# Supplementary material
Source: HighWire-hosted journal article supplement (https://bmjopen.bmj.com/content/10/9/e034147)
Supplement: inline-supplementary-material-2 [file inline-supplementary-material-2.pdf]

Appendix B: Additional details of Systematic literature review

A.1 Literature search strategies for non-transfusions SLR

Table 1: Search strategy for non-transfusions search of MEDLINE

| #  | Searches                                                                                                                                                                                                                                                          | Concept                   |
|----|-------------------------------------------------------------------------------------------------------------------------------------------------------------------------------------------------------------------------------------------------------------------|---------------------------|
| 1  | exp pain/                                                                                                                                                                                                                                                         | Outcomes                  |
| 2  | (pain or painfull).tw.                                                                                                                                                                                                                                            |                           |
| 3  | (venooclusive or "vein occlusive" or "vein interruption" or "vein obstruction" or "vein occlusion" or "vena obstruction" or "veno occlusive" or "venous obstruction" or "venous occlusion" or vaso-occlusiv* or crisis or crises).tw.                             |                           |
| 4  | exp length of stay/                                                                                                                                                                                                                                               |                           |
| 5  | (hospital adj3 (admission or stay)).tw.                                                                                                                                                                                                                           |                           |
| 6  | (patient adj3 (admission or stay)).tw.                                                                                                                                                                                                                            |                           |
| 7  | or/1-6                                                                                                                                                                                                                                                            |                           |
| 8  | anemia, sickle cell/                                                                                                                                                                                                                                              | Population                |
| 9  | hemoglobin, sickle/                                                                                                                                                                                                                                               |                           |
| 10 | (sickle cell or sickle h?emoglobin or drepanocyt* or drepanotic or drepanocytemia or h?emoglobin-s or Hb-S or sickle an?emia or meniscocytosis).mp.                                                                                                               |                           |
| 11 | or/8-10                                                                                                                                                                                                                                                           |                           |
| 12 | exp antisickling agents/                                                                                                                                                                                                                                          | Interventions             |
| 13 | (antisickling agent* or sickling inhibitor* or Efavproxiral or Dimethyl Adipimidate or desickling agent* or cetiedil or glutamine or hydroxyurea or rivipansel or senicapoc or tucaresol or velaresol or crizanlizumab or L-glutamine or voxelotor or GBT440).mp. |                           |
| 14 | (8 or 9 or 10) and prevent vaso-occlusiv*.tw.                                                                                                                                                                                                                     |                           |
| 15 | or/12-14                                                                                                                                                                                                                                                          |                           |
| 16 | 7 and 11 and 15                                                                                                                                                                                                                                                   |                           |
| 17 | meta analysis.pt.                                                                                                                                                                                                                                                 | Systematic review         |
| 18 | ((meta adj analys*) or metaanalys or meta-analys*).ti,ab,sh.                                                                                                                                                                                                      | and meta-analysis studies |
| 19 | (systematic adj5 (review or overview*)).ti,ab,sh.                                                                                                                                                                                                                 |                           |
| 20 | or/17-19                                                                                                                                                                                                                                                          |                           |
| 21 | 16 and 20                                                                                                                                                                                                                                                         |                           |
| 22 | clinical trial/                                                                                                                                                                                                                                                   | RCTs                      |
| 23 | (clinic adj5 trial*).ti,ab,sh.                                                                                                                                                                                                                                    |                           |

| #  | Searches                                                                                                                                                                                          | Concept           |
|----|---------------------------------------------------------------------------------------------------------------------------------------------------------------------------------------------------|-------------------|
| 24 | single blind method/                                                                                                                                                                              |                   |
| 25 | double blind method/                                                                                                                                                                              |                   |
| 26 | random allocation/                                                                                                                                                                                |                   |
| 27 | placebos/                                                                                                                                                                                         |                   |
| 28 | (placebo or random*).ti,ab,sh.                                                                                                                                                                    |                   |
| 29 | randomized controlled trial/                                                                                                                                                                      |                   |
| 30 | (randomized controlled trial or controlled clinical trial or clinical trial).pt.                                                                                                                  |                   |
| 31 | ((single or double or triple or treble) adj (blind or mask*)).ti,ab,sh.                                                                                                                           |                   |
| 32 | randomi?ed control trial*.tw.                                                                                                                                                                     |                   |
| 33 | or/22-32                                                                                                                                                                                          |                   |
| 34 | 16 and 33                                                                                                                                                                                         |                   |
| 35 | epidemiologic studies/ or case-control studies/ or cross-sectional studies/ or cohort studies/ or follow-up studies/ or longitudinal studies/ or prospective studies/ or retrospective studies/   | Single arm trials |
| 36 | ((epidemiologic or prospective or retrospective or cross-sectional or feasibil* or pilot or case control* or cohort or longitudinal) adj3 (study or trial* or studies)).ti,ab,kf.                 |                   |
| 37 | (case control* or cross-sectional or cohort? or follow-up or followup or longitudinal or prospective or retrospective or observational or population).ti.                                         |                   |
| 38 | ((cohort? adj2 (analys* or compar* or data or study or studies)) or (population adj2 (based or data* or study or studies or register? or registry or registries or survey? or surveillance))).ab. |                   |
| 39 | Clinical Trial, Phase I.pt.                                                                                                                                                                       |                   |
| 40 | Clinical Trial, Phase II.pt.                                                                                                                                                                      |                   |
| 41 | Clinical Trial, Phase III.pt.                                                                                                                                                                     |                   |
| 42 | (registry or registries).ti,ab,kf,hw.                                                                                                                                                             |                   |
| 43 | ((single adj arm*) or single-arm or single group or uncontrol* or un-control* or "no control*").ti,ab,kf,hw.                                                                                      |                   |
| 44 | ((phase 1 or Phase i or Phase 2 or Phase ii or Phase 3 or Phase iii) and (trial* or study or studies)).ti,ab,kf.                                                                                  |                   |
| 45 | (nonrandom* or non-random*).ti,ab,kf.                                                                                                                                                             |                   |
| 46 | ((control* adj2 before adj2 after) or CBA study).ti,ab,kf.                                                                                                                                        |                   |
| 47 | {all adj3 received).ab.                                                                                                                                                                           |                   |
| 48 | or/35-47                                                                                                                                                                                          |                   |
| 49 | 16 and 48                                                                                                                                                                                         |                   |

| #  | Searches                         | Concept                                      |
|----|----------------------------------|----------------------------------------------|
| 50 | limit 21 to ed=20170130-20180620 | Date limit on rSLR and meta-analysis studies |
| 51 | limit 34 to ed=20170130-20180620 | Date limit on RCTs                           |
| 52 | limit 49 to ed=20170130-20180620 | Date limit on single arm trials              |

**Table 2: Search strategy for non-transfusions search of EMBASE**

| #  | Searches                                                                                                                                                                                                                                                          |              |
|----|-------------------------------------------------------------------------------------------------------------------------------------------------------------------------------------------------------------------------------------------------------------------|--------------|
| 1  | exp pain/                                                                                                                                                                                                                                                         | Outcomes     |
| 2  | (pain or painfull).tw.                                                                                                                                                                                                                                            |              |
| 3  | (venooclusive or "vein occlusive" or "vein interruption" or "vein obstruction" or "vein occlusion" or "vena obstruction" or "veno occlusive" or "venous obstruction" or "venous occlusion" or vaso-occlusiv* or crisis or crises).tw.                             |              |
| 4  | exp "length of stay"/                                                                                                                                                                                                                                             |              |
| 5  | (hospital adj3 (admission or stay)).tw.                                                                                                                                                                                                                           |              |
| 6  | (patient adj3 (admission or stay)).tw.                                                                                                                                                                                                                            |              |
| 7  | or/1-6                                                                                                                                                                                                                                                            |              |
| 8  | sickle cell anemia/                                                                                                                                                                                                                                               | Population   |
| 9  | hemoglobin S/                                                                                                                                                                                                                                                     |              |
| 10 | (sickle cell or sickle h\$emoglobin or drepanocyt* or drepanotic or drepanocytemia or h\$emoglobin-s or Hb-S or sickle an\$emia or meniscocytosis).mp.                                                                                                            |              |
| 11 | or/8-10                                                                                                                                                                                                                                                           |              |
| 12 | antisickling agent/                                                                                                                                                                                                                                               | Intervention |
| 13 | (antisickling agent* or sickling inhibitor* or Efavproxiral or Dimethyl Adipimidate or desickling agent* or cetiedil or glutamine or hydroxyurea or rivipansel or senicapoc or tucaresol or velaresol or crizanlizumab or L-glutamine or voxelotor or GBT440).mp. |              |
| 14 | (8 or 9 or 10) and prevent vaso-occlusiv*.tw.                                                                                                                                                                                                                     |              |
| 15 | or/12-14                                                                                                                                                                                                                                                          |              |
| 16 | 7 and 11 and 15                                                                                                                                                                                                                                                   | RCTs         |
| 17 | randomized controlled trial/                                                                                                                                                                                                                                      |              |
| 18 | (RCT or randomi#ed or randomi#ation).ab,ti,kw,hw.                                                                                                                                                                                                                 |              |

| #  | Searches                                                                                                                                                                                              |                                 |
|----|-------------------------------------------------------------------------------------------------------------------------------------------------------------------------------------------------------|---------------------------------|
| 19 | (random* adj3 (administ* or allocat* or assign* or class* or control* or determine* or divide* or distribut* or expose* or fashion* or number* or place* or recruit* or substitut* or treat*)).ab,kw. |                                 |
| 20 | trial.ti.                                                                                                                                                                                             |                                 |
| 21 | crossover procedure/                                                                                                                                                                                  |                                 |
| 22 | ((singl* or doubl* or tripl* or trebl*) adj3 (blind* or mask* or dumm*)).ti,ab,kw,hw.                                                                                                                 |                                 |
| 23 | phase 2 clinical trial/ or phase 3 clinical trial/ or phase 4 clinical trial/                                                                                                                         |                                 |
| 24 | or/17-23                                                                                                                                                                                              |                                 |
| 25 | 16 and 24                                                                                                                                                                                             |                                 |
| 26 | prospective study/ or retrospective study/ or longitudinal study/ or cohort analysis/ or cross-sectional study/ or case control study/ or population based case control study/                        | Single-arm trials               |
| 27 | ((epidemiologic or prospective or retrospective or cross-sectional or feasibil* or pilot or case control* or cohort or longitudinal) adj3 study).ti,ab,kw.                                            |                                 |
| 28 | (case control* or cross-sectional or cohort? or follow-up or followup or longitudinal or prospective or retrospective or observational or population).ti.                                             |                                 |
| 29 | ((cohort? adj2 (analys* or compar* or data or study or studies)) or (population adj2 (based or data* or study or studies or register? or registry or registries or survey? or surveillance))).ab,kw.  |                                 |
| 30 | (registry or registries).ti,ab,kw,hw.                                                                                                                                                                 |                                 |
| 31 | (nonrandom* or non-random*).ti,ab,kw.                                                                                                                                                                 |                                 |
| 32 | ((control* adj2 before adj2 after) or CBA study).ti,ab,kw.                                                                                                                                            |                                 |
| 33 | ((single adj arm*) or single-arm or single group or uncontrol* or un-control* or "no control*").ti,ab,kw.                                                                                             |                                 |
| 34 | (all adj3 received).ab.                                                                                                                                                                               |                                 |
| 35 | phase 2 clinical trial/ or phase 3 clinical trial/ or phase 1 clinical trial/                                                                                                                         |                                 |
| 36 | ((phase 1 or Phase i or Phase 2 or Phase ii or Phase 3 or Phase iii) and (trial* or study or studies)).ti,ab,kw.                                                                                      |                                 |
| 37 | or/26-36                                                                                                                                                                                              |                                 |
| 38 | 16 and 37                                                                                                                                                                                             |                                 |
| 39 | limit 25 to em=201705-201825                                                                                                                                                                          | Date limit on RCTs              |
| 49 | limit 38 to em=201705-201825                                                                                                                                                                          | Date limit on single arm trials |

**Table 3: Search strategy for non-transfusions search of Cochrane Register of Controlled Trials**

| #   | Searches                                                                                                                                                                                                                                                             |               |
|-----|----------------------------------------------------------------------------------------------------------------------------------------------------------------------------------------------------------------------------------------------------------------------|---------------|
| #1  | MeSH descriptor: [Pain] explode all trees                                                                                                                                                                                                                            | Outcomes      |
| #2  | (pain or painfull):ti,ab,kw                                                                                                                                                                                                                                          |               |
| #3  | (venoocclusive or "vein occlusive" or "vein interruption" or "vein obstruction" or "vein occlusion" or "vena obstruction" or "veno occlusive" or "venous obstruction" or "venous occlusion" or vaso-occlusiv* or crisis or crises):ti,ab,kw                          |               |
| #4  | MeSH descriptor: [Length of Stay] explode all trees                                                                                                                                                                                                                  |               |
| #5  | (hospital near/3 (admission or stay)):ti,ab,kw                                                                                                                                                                                                                       |               |
| #6  | (patient near/3 (admission or stay)):ti,ab,kw                                                                                                                                                                                                                        |               |
| #7  | #1 or #2 or #3 or #4 or #5 or #6                                                                                                                                                                                                                                     |               |
| #8  | MeSH descriptor: [Anemia, Sickle Cell] this term only                                                                                                                                                                                                                | Population    |
| #9  | MeSH descriptor: [Hemoglobin, Sickle] this term only                                                                                                                                                                                                                 |               |
| #10 | (sickle cell or sickle h*emoglobin or drepanocyt* or drepanotic or drepanocytemia or h*emoglobin-s or Hb-S or sickle an*emia or meniscocytosis):ti,ab,kw                                                                                                             |               |
| #11 | #8 or #9 or #10                                                                                                                                                                                                                                                      |               |
| #12 | MeSH descriptor: [Antisickling Agents] explode all trees                                                                                                                                                                                                             | Interventions |
| #13 | (antisickling agent* or sickling inhibitor* or Efavoxiral or Dimethyl Adipimidate or desickling agent* or cetiedil or glutamine or hydroxyurea or rivipansel or senicapoc or tucaresol or velaresol or crizanlizumab or L-glutamine or voxelotor or GBT440):ti,ab,kw |               |
| #14 | (#8 or #9 or #10) and prevent vaso-occlusiv*                                                                                                                                                                                                                         |               |
| #15 | #11 or #12 or #13                                                                                                                                                                                                                                                    |               |
| #16 | #7 and #11 and #14                                                                                                                                                                                                                                                   |               |

**Table 6: Search strategy for non-transfusions search of ClinicalTrials.gov\***

| #  | Searches                                                                                                                                                                                                                           | Search column          |
|----|------------------------------------------------------------------------------------------------------------------------------------------------------------------------------------------------------------------------------------|------------------------|
| #1 | Anemia, Sickle Cell OR Sickle Beta Thalassemia OR Sickle Cell Anemia OR Sickle Cell trait                                                                                                                                          | Condition or disease   |
| #2 | SCD OR SCA OR Sickle                                                                                                                                                                                                               | Other terms            |
| #3 | Drug OR Placebo OR Crizanlizumab OR Hydroxyurea OR L-glutamine OR Voxelotor OR GBT440 OR hydroxycarbamide                                                                                                                          | Intervention/treatment |
| #4 | pain OR hospitalisation OR hospitalization OR (hospital AND (admission OR stay)) OR crisis OR VOC OR ((vaso OR vein OR vena OR venous) AND (occlusive OR occlusive OR interruption OR obstruction)) OR survival OR quality of life | Outcome Measures       |
|    | #1 or #2 or #3 or #4                                                                                                                                                                                                               |                        |

\*Advanced Search option without any restrictions except search strings listed.

A.2 Literature search strategies for transfusions SLR

Table 4: Search strategy for transfusions search on CENTRAL database

| #   | Searches                                                                                                                                                                                                                                                                                        | Results |
|-----|-------------------------------------------------------------------------------------------------------------------------------------------------------------------------------------------------------------------------------------------------------------------------------------------------|---------|
| #1  | MeSH descriptor: [Anemia, Sickle Cell] this term only                                                                                                                                                                                                                                           | 583     |
| #2  | MeSH descriptor: [Hemoglobin, Sickle] this term only                                                                                                                                                                                                                                            | 19      |
| #3  | (sickle cell or sickle h*emoglobin or drepanocyt* or drepanotic or drepanocytemia or h*emoglobin-s or Hb-S or sickle an*emia or meniscocytosis):ti,ab,kw                                                                                                                                        | 4790    |
| #4  | #1 or #2 or #3                                                                                                                                                                                                                                                                                  | 4790    |
| #5  | MeSH descriptor: [Blood Transfusion] this term only                                                                                                                                                                                                                                             | 1766    |
| #6  | MeSH descriptor: [Erythrocyte Transfusion] explode all trees                                                                                                                                                                                                                                    | 564     |
| #7  | ((blood or erythrocyte* or "red cell*" or "red blood cell*" or RBC*) near/5 (transfus* or infus* or unit*))                                                                                                                                                                                     | 14775   |
| #8  | ((red cell* or RBC* or erythrocyte* or red blood cell* or whole blood or transfus*) near/5 (use* or usage* or utiliz* or utilis* or requir* or need* or administ* or replac* or support* or strateg* or management or practic* or indicat* or criteri* or standard* or program* or therapy)):ab | 30189   |
| #9  | ((red cell* or RBC* or erythrocyte* or blood or transfus*) and (use* or usage* or utiliz* or utilis* or requir* or need* or administ* or replac* or support* or strateg* or management or practic* or indicat* or criteri* or standard* or program*)):ti                                        | 3612    |
| #10 | ("allogeneic blood" or (unit* near/2 blood) or "allogenic blood" or (blood near/2 exposure) or "donor blood" or "blood product*" or "blood component*" or "blood support")                                                                                                                      | 3365    |
| #11 | hemotransfus* or haemotransfus* or hypertransfus* or hemotherap* or haemotherap*                                                                                                                                                                                                                | 107     |
| #12 | (red cell* or erythrocyte* or blood or RBC*) and transfus*:ti                                                                                                                                                                                                                                   | 2434    |
| #13 | #5 or #6 or #7 or #8 or #9 or #10 or #11 or #12                                                                                                                                                                                                                                                 | 41927   |
| #14 | MeSH descriptor: [Blood Component Transfusion] this term only                                                                                                                                                                                                                                   | 115     |
| #15 | MeSH descriptor: [Erythrocytes] this term only                                                                                                                                                                                                                                                  | 1478    |
| #16 | (red cell* or red blood cell* or erythrocyte* or RBC*)                                                                                                                                                                                                                                          | 12756   |
| #17 | #14 and (#15 or #16)                                                                                                                                                                                                                                                                            | 39      |
| #18 | #13 or #17                                                                                                                                                                                                                                                                                      | 41927   |
| #19 | MeSH descriptor: [Pain] explode all trees                                                                                                                                                                                                                                                       | 42323   |
| #20 | (pain or painful):ti,ab,kw                                                                                                                                                                                                                                                                      | 124349  |

| #   | Searches                                                                                                                                                                                                                                    | Results |
|-----|---------------------------------------------------------------------------------------------------------------------------------------------------------------------------------------------------------------------------------------------|---------|
| #21 | (venoocclusive or "vein occlusive" or "vein interruption" or "vein obstruction" or "vein occlusion" or "vena obstruction" or "veno occlusive" or "venous obstruction" or "venous occlusion" or vaso-occlusiv* or crisis or crises):ti,ab,kw | 4404    |
| #22 | MeSH descriptor: [Length of Stay] explode all trees                                                                                                                                                                                         | 6488    |
| #23 | (hospital near/3 (admission or stay)):ti,ab,kw                                                                                                                                                                                              | 20854   |
| #24 | (patient near/3 (admission or stay)):ti,ab,kw                                                                                                                                                                                               | 1779    |
| #25 | #19 or #20 or #21 or #22 or #23 or #24                                                                                                                                                                                                      | 153780  |
| #26 | #4 and #18 and #25                                                                                                                                                                                                                          | 332     |

Table 5: Search strategy for transfusions search on MEDLINE database

| #  | Searches                                                                                                                                                                                                                                                                            | Results |
|----|-------------------------------------------------------------------------------------------------------------------------------------------------------------------------------------------------------------------------------------------------------------------------------------|---------|
| 1  | anemia, sickle cell/                                                                                                                                                                                                                                                                | 19329   |
| 2  | hemoglobin, sickle/                                                                                                                                                                                                                                                                 | 3011    |
| 3  | (sickle cell or sickle h?emoglobin or drepanocyt* or drepanotic or drepanocytemia or h?emoglobin-s or Hb-S or sickle an?emia or meniscocytosis).mp.                                                                                                                                 | 27120   |
| 4  | 1 or 2 or 3                                                                                                                                                                                                                                                                         | 27602   |
| 5  | Blood Transfusion/                                                                                                                                                                                                                                                                  | 48056   |
| 6  | Erythrocyte Transfusion/                                                                                                                                                                                                                                                            | 8033    |
| 7  | ((blood or erythrocyte* or red cell* or red blood cell* or RBC*) adj5 (transfus* or infus* or unit* or therap*)):ti,ab.                                                                                                                                                             | 90906   |
| 8  | ((red cell* or RBC* or erythrocyte* or red blood cell* or whole blood or transfus*) adj5 (use* or usage* or utiliz* or utilis* or requir* or need* or administ* or replac* or support* or strateg* or management or practic* or indicat* or criteri* or standard* or program*)):ab. | 47785   |
| 9  | ((red cell* or RBC* or erythrocyte* or blood or transfus*) and (use* or usage* or utiliz* or utilis* or requir* or need* or administ* or replac* or support* or strateg* or management or practic* or indicat* or criteri* or standard* or program*)):ti.                           | 35184   |
| 10 | (allogeneic blood or (unit* adj2 blood) or allogenic blood or (blood adj2 exposure) or donor blood or blood product* or blood component* or blood support).ti,ab.                                                                                                                   | 26829   |
| 11 | (hemotransfus* or haemotransfus* or hypertransfus* or hemotherap* or haemotherap*).tw.                                                                                                                                                                                              | 1217    |
| 12 | (red cell* or erythrocyte* or blood or RBC*).tw. and transfus*.ti.                                                                                                                                                                                                                  | 24060   |
| 13 | 5 or 6 or 7 or 8 or 9 or 10 or 11 or 12                                                                                                                                                                                                                                             | 183648  |
| 14 | Blood Component Transfusion/                                                                                                                                                                                                                                                        | 3477    |
| 15 | PLASMA EXCHANGE/ or PLATELET TRANSFUSION/ or exp LEUKOCYTE TRANSFUSION/                                                                                                                                                                                                             | 16726   |

| #  | Searches                                                                                                                                                                                                                                              | Results |
|----|-------------------------------------------------------------------------------------------------------------------------------------------------------------------------------------------------------------------------------------------------------|---------|
| 16 | 14 not 15                                                                                                                                                                                                                                             | 3229    |
| 17 | ERYTHROCYTES/                                                                                                                                                                                                                                         | 128578  |
| 18 | (red cell* or red blood cell* or erythrocyte* or RBC*).tw.                                                                                                                                                                                            | 216650  |
| 19 | 17 or 18                                                                                                                                                                                                                                              | 258199  |
| 20 | 16 and 19                                                                                                                                                                                                                                             | 834     |
| 21 | ((transfus* or red cell* or red blood cell* or RBC*) adj10 (trigger* or thresh?old* or target* or restrict* or liberal* or aggressive* or conservative* or prophylactic* or limit* or protocol* or policy or policies or practice* or standard*)).tw. | 13177   |
| 22 | ((((transfus* or red cell* or red blood cell* or RBC* or h?ematocrit*) and (level* or critical* or intensive* or h?emorrhag* or bleed*)) or hypertransfus*).ti.                                                                                       | 3326    |
| 23 | 13 or 20 or 21 or 22                                                                                                                                                                                                                                  | 188025  |
| 24 | exp pain/                                                                                                                                                                                                                                             | 362648  |
| 25 | (pain or painfull).tw.                                                                                                                                                                                                                                | 547392  |
| 26 | (venooclusive or "vein occlusive" or "vein interruption" or "vein obstruction" or "vein occlusion" or "vena obstruction" or "veno occlusive" or "venous obstruction" or "venous occlusion" or vaso -occlusiv* or crisis or crises).tw.                | 66169   |
| 27 | exp length of stay/                                                                                                                                                                                                                                   | 77857   |
| 28 | (hospital adj3 (admission or stay)).tw.                                                                                                                                                                                                               | 104873  |
| 29 | (patient adj3 (admission or stay)).tw.                                                                                                                                                                                                                | 6507    |
| 30 | or/24-29                                                                                                                                                                                                                                              | 901074  |
| 31 | 4 and 23 and 30                                                                                                                                                                                                                                       | 848     |
| 32 | clinical trial/                                                                                                                                                                                                                                       | 512148  |
| 33 | (clinic adj5 trial*).ti,ab,sh.                                                                                                                                                                                                                        | 1010    |
| 34 | single blind method/                                                                                                                                                                                                                                  | 25632   |
| 35 | double blind method/                                                                                                                                                                                                                                  | 147368  |
| 36 | random allocation/                                                                                                                                                                                                                                    | 95709   |
| 37 | placebos/                                                                                                                                                                                                                                             | 34063   |
| 38 | (placebo or random*).ti,ab,sh.                                                                                                                                                                                                                        | 1263924 |
| 39 | randomized controlled trial/                                                                                                                                                                                                                          | 467730  |
| 40 | (randomized controlled trial or controlled clinical trial or clinical trial).pt.                                                                                                                                                                      | 786522  |
| 41 | ((single or double or triple or treble) adj (blind or mask*)).ti,ab,sh.                                                                                                                                                                               | 145215  |
| 42 | randomi?ed control trial*.tw.                                                                                                                                                                                                                         | 6481    |
| 43 | or/32-42                                                                                                                                                                                                                                              | 1565168 |

| #  | Searches                                                                                                                                                                                          | Results |
|----|---------------------------------------------------------------------------------------------------------------------------------------------------------------------------------------------------|---------|
| 44 | epidemiologic studies/ or case-control studies/ or cross-sectional studies/ or cohort studies/ or follow-up studies/ or longitudinal studies/ or prospective studies/ or retrospective studies/   | 2187051 |
| 45 | ((epidemiologic or prospective or retrospective or cross-sectional or feasibil* or pilot or case control* or cohort or longitudinal) adj3 (study or trial* or studies)).ti,ab,kf.                 | 1071161 |
| 46 | (case control* or cross-sectional or cohort? or follow-up or followup or longitudinal or prospective or retrospective or observational or population).ti.                                         | 615678  |
| 47 | ((cohort? adj2 (analys* or compar* or data or study or studies)) or (population adj2 (based or data* or study or studies or register? or registry or registries or survey? or surveillance))).ab. | 340559  |
| 48 | Clinical Trial, Phase I.pt.                                                                                                                                                                       | 18409   |
| 49 | Clinical Trial, Phase II.pt.                                                                                                                                                                      | 29604   |
| 50 | Clinical Trial, Phase III.pt.                                                                                                                                                                     | 14110   |
| 51 | (registry or registries).ti,ab,kf,hw.                                                                                                                                                             | 139501  |
| 52 | ((single adj arm*) or single-arm or single group or uncontrol* or un-control* or "no control").ti,ab,kf,hw.                                                                                       | 53439   |
| 53 | ((phase 1 or Phase i or Phase 2 or Phase ii or Phase 3 or Phase iii) and (trial* or study or studies)).ti,ab,kf.                                                                                  | 114108  |
| 54 | (nonrandom* or non-random*).ti,ab,kf.                                                                                                                                                             | 34084   |
| 55 | ((control* adj2 before adj2 after) or CBA study).ti,ab,kf.                                                                                                                                        | 2644    |
| 56 | (all adj3 received).ab.                                                                                                                                                                           | 41192   |
| 57 | or/44-56                                                                                                                                                                                          | 3114626 |
| 58 | 31 and 43                                                                                                                                                                                         | 120     |
| 59 | 31 and 57                                                                                                                                                                                         | 278     |

**Table 6: Search strategy for transfusions search on EMBASE database**

| #  | Searches                                                                                                                                                                                                                                                                            | Results |
|----|-------------------------------------------------------------------------------------------------------------------------------------------------------------------------------------------------------------------------------------------------------------------------------------|---------|
| 1  | exp Anemia, Sickle Cell/                                                                                                                                                                                                                                                            | 32009   |
| 2  | (h?emoglobin s or h?emoglobin sc or h?emoglobin se or h?emoglobin ss or h?emoglobin c or h?emoglobin d or Hb s or Hb sc or Hb se or Hb ss or Hb c or Hb d or sc disease*).tw.                                                                                                       | 5794    |
| 3  | (sickle cell or sicklemlia or sickled or sickling or meniscocyt* or drepanocyt*).tw.                                                                                                                                                                                                | 29569   |
| 4  | 1 or 2 or 3                                                                                                                                                                                                                                                                         | 38361   |
| 5  | Blood Transfusion/                                                                                                                                                                                                                                                                  | 108332  |
| 6  | Erythrocyte Transfusion/                                                                                                                                                                                                                                                            | 23021   |
| 7  | ((blood or erythrocyte* or red cell* or red blood cell* or RBC*) adj5 (transfus* or infus* or unit* or therap*)).ti,ab.                                                                                                                                                             | 135137  |
| 8  | ((red cell* or RBC* or erythrocyte* or red blood cell* or whole blood or transfus*) adj5 (use* or usage* or utiliz* or utilis* or requir* or need* or administ* or replac* or support* or strateg* or management or practic* or indicat* or criteri* or standard* or program*)).ab. | 77239   |
| 9  | ((red cell* or RBC* or erythrocyte* or blood or transfus*) and (use* or usage* or utiliz* or utilis* or requir* or need* or administ* or replac* or support* or strateg* or management or practic* or indicat* or criteri* or standard* or program*)).ti.                           | 38387   |
| 10 | (allogeneic blood or (unit* adj2 blood) or allogenic blood or (blood adj2 exposure) or donor blood or blood product* or blood component* or blood support).ti,ab.                                                                                                                   | 43111   |
| 11 | (hemotransfus* or haemotransfus* or hypertransfus* or hemotherap* or haemotherap*).tw.                                                                                                                                                                                              | 1555    |
| 12 | (red cell* or erythrocyte* or blood or RBC*).tw. and transfus*.ti.                                                                                                                                                                                                                  | 28985   |
| 13 | 5 or 6 or 7 or 8 or 9 or 10 or 11 or 12                                                                                                                                                                                                                                             | 273982  |
| 14 | Blood Component Transfusion/                                                                                                                                                                                                                                                        | 2629    |
| 15 | PLASMA EXCHANGE/ or PLATELET TRANSFUSION/ or exp LEUKOCYTE TRANSFUSION/                                                                                                                                                                                                             | 19765   |
| 16 | 14 not 15                                                                                                                                                                                                                                                                           | 2279    |
| 17 | ERYTHROCYTES/                                                                                                                                                                                                                                                                       | 112741  |
| 18 | (red cell* or red blood cell* or erythrocyte* or RBC*).tw.                                                                                                                                                                                                                          | 256379  |
| 19 | 17 or 18                                                                                                                                                                                                                                                                            | 278120  |
| 20 | 16 and 19                                                                                                                                                                                                                                                                           | 523     |
| 21 | ((transfus* or red cell* or red blood cell* or RBC*) adj10 (trigger* or thresh?old* or target* or restrict* or liberal* or aggressive* or conservative* or prophylactic* or limit* or protocol* or policy or policies or practice* or standard*)).tw.                               | 22304   |
| 22 | ((((transfus* or red cell* or red blood cell* or RBC* or h?ematocrit*) and (level* or critical* or intensive* or h?emorrhag* or bleed*)) or hypertransfus*).ti.                                                                                                                     | 4095    |
| 23 | 13 or 20 or 21 or 22                                                                                                                                                                                                                                                                | 279695  |

| #  | Searches                                                                                                                                                                                                                               | Results |
|----|----------------------------------------------------------------------------------------------------------------------------------------------------------------------------------------------------------------------------------------|---------|
| 24 | exp pain/                                                                                                                                                                                                                              | 1146280 |
| 25 | (pain or painfull).tw.                                                                                                                                                                                                                 | 789805  |
| 26 | (venoocclusive or "vein occlusive" or "vein interruption" or "vein obstruction" or "vein occlusion" or "vena obstruction" or "veno occlusive" or "venous obstruction" or "venous occlusion" or vaso-occlusiv* or crisis or crises).tw. | 82887   |
| 27 | exp length of stay/                                                                                                                                                                                                                    | 150699  |
| 28 | (hospital adj3 (admission or stay)).tw.                                                                                                                                                                                                | 169748  |
| 29 | (patient adj3 (admission or stay)).tw.                                                                                                                                                                                                 | 12514   |
| 30 | or/24-29                                                                                                                                                                                                                               | 1690290 |
| 31 | 4 and 23 and 30                                                                                                                                                                                                                        | 2325    |
| 32 | randomized controlled trial/                                                                                                                                                                                                           | 508600  |
| 33 | (RCT or randomi#ed or randomi#ation).ab,ti,kw,hw.                                                                                                                                                                                      | 1062285 |
| 34 | (random* adj3 (administ* or allocat* or assign* or class* or control* or determine* or divide* or distribut* or expose* or fashion* or number* or place* or recruit* or substitut* or treat*)).ab,kw.                                  | 560662  |
| 35 | trial.ti.                                                                                                                                                                                                                              | 248694  |
| 36 | crossover procedure/                                                                                                                                                                                                                   | 56042   |
| 37 | ((singl* or doubl* or tripl* or trebl*) adj3 (blind* or mask* or dumm*)).ti,ab,kw,hw.                                                                                                                                                  | 276112  |
| 38 | phase 2 clinical trial/ or phase 3 clinical trial/ or phase 4 clinical trial/                                                                                                                                                          | 99658   |
| 39 | or/32-38                                                                                                                                                                                                                               | 1386841 |
| 40 | prospective study/ or retrospective study/ or longitudinal study/ or cohort analysis/ or cross - sectional study/ or case control study/ or population based case control study/                                                       | 1771952 |
| 41 | ((epidemiologic or prospective or retrospective or cross-sectional or feasibil* or pilot or case control* or cohort or longitudinal) adj3 study).ti,ab,kw.                                                                             | 1282224 |
| 42 | (case control* or cross-sectional or cohort? or follow-up or followup or longitudinal or prospective or retrospective or observational or population).ti.                                                                              | 790240  |
| 43 | ((cohort? adj2 (analys* or compar* or data or study or studies)) or (population adj2 (based or data* or study or studies or register? or registry or registries or survey? or surveillance))).ab,kw.                                   | 500633  |
| 44 | (registry or registries).ti,ab,kw,hw.                                                                                                                                                                                                  | 183687  |
| 45 | (nonrandom* or non-random*).ti,ab,kw.                                                                                                                                                                                                  | 42777   |
| 46 | ((control* adj2 before adj2 after) or CBA study).ti,ab,kw.                                                                                                                                                                             | 3333    |
| 47 | ((single adj arm*) or single-arm or single group or uncontrol* or un-control* or "no control*").ti,ab,kw.                                                                                                                              | 80316   |
| 48 | (all adj3 received).ab.                                                                                                                                                                                                                | 75969   |

| #  | Searches                                                                                                         | Results |
|----|------------------------------------------------------------------------------------------------------------------|---------|
| 49 | phase 2 clinical trial/ or phase 3 clinical trial/ or phase 1 clinical trial/                                    | 126474  |
| 50 | ((phase 1 or Phase i or Phase 2 or Phase ii or Phase 3 or Phase iii) and (trial* or study or studies)).ti,ab,kw. | 205403  |
| 51 | or/40-50                                                                                                         | 3180246 |
| 52 | 31 and 39                                                                                                        | 245     |
| 53 | 31 and 51                                                                                                        | 599     |

Table 7: Search strategy for transfusions search on clinicaltrials.gov database

| #  | Searches                                                                                                                                                                                                                           | Search column          |
|----|------------------------------------------------------------------------------------------------------------------------------------------------------------------------------------------------------------------------------------|------------------------|
| #1 | Anemia, Sickle Cell OR Sickle Beta Thalassemia OR Sickle Cell Anemia OR Sickle Cell trait                                                                                                                                          | Condition or disease   |
| #2 | SCD OR SCA OR Sickle                                                                                                                                                                                                               | Other terms            |
| #3 | Transfusion OR blood OR RBC OR hematocrit OR erythrocyte                                                                                                                                                                           | Intervention/treatment |
| #4 | pain OR hospitalisation OR hospitalization OR (hospital AND (admission OR stay)) OR crisis OR VOC OR ((vaso OR vein OR vena OR venous) AND (occlusive OR occlusive OR interruption OR obstruction)) OR survival OR quality of life | Outcome Measures       |
|    | #1 or #2 or #3 or #4                                                                                                                                                                                                               |                        |

\*Advanced Search option without any restrictions except search strings listed.

A.3 Additional results from systematic literature review

Table 8: Cochrane risk of bias assessment of randomized controlled trials included in the feasibility assessment

| Trial ID    | Random sequence generation | Allocation concealment | Blinding (personal) | Blinding (outcome assessor) | Incomplete outcome data | Selective reporting | Other bias                                           |
|-------------|----------------------------|------------------------|---------------------|-----------------------------|-------------------------|---------------------|------------------------------------------------------|
| Arruda 2013 | Low                        | Low                    | Unclear             | Unclear                     | Low                     | Unclear             | None                                                 |
| Ataga 2008  | Low                        | Low                    | Low                 | Low                         | Low                     | Low                 | Industry funded; Any conflict of interest of authors |
| Ataga 2011  | Low                        | Low                    | Low                 | Low                         | Low                     | Low                 | Industry funded; Any conflict of                     |

| Trial ID              | Random sequence generation | Allocation concealment | Blinding (personal) | Blinding (outcome assessor) | Incomplete outcome data | Selective reporting | Other bias                                                            |
|-----------------------|----------------------------|------------------------|---------------------|-----------------------------|-------------------------|---------------------|-----------------------------------------------------------------------|
|                       |                            |                        |                     |                             |                         |                     | interest of authors                                                   |
| <b>Ataga 2017</b>     | Low                        | Low                    | Low                 | Low                         | Unclear                 | Low                 | Industry funded; Any conflict of interest of authors                  |
| <b>Bao 2008</b>       | Unclear                    | Unclear                | Low                 | Low                         | Low                     | Low                 | None                                                                  |
| <b>Cabannes 1984</b>  | Low                        | Low                    | Low                 | Low                         | Unclear                 | Low                 | Baseline imbalances or not assessed                                   |
| <b>Deceulaer 1982</b> | Unclear                    | Unclear                | Unclear             | Low                         | Unclear                 | Unclear             | Baseline imbalances or not assessed; Industry funded                  |
| <b>Diop 2011</b>      | Low                        | Low                    | Low                 | Low                         | Low                     | Low                 | None                                                                  |
| <b>Glassberg 2017</b> | Low                        | Low                    | Low                 | Low                         | Low                     | Low                 | None                                                                  |
| <b>NCT02482298</b>    | Unclear                    | Unclear                | Low                 | Low                         | Low                     | Low                 | Industry funded                                                       |
| <b>Niihara 2018</b>   | Unclear                    | Unclear                | Low                 | Low                         | High                    | Low                 | Industry funded                                                       |
| <b>Pace 2003</b>      | Unclear                    | Unclear                | Low                 | Low                         | High                    | Low                 | Industry funded                                                       |
| <b>Schlaeger 2017</b> | Low                        | Low                    | Low                 | Low                         | Low                     | Low                 | None                                                                  |
| <b>Sins 2017</b>      | Low                        | Low                    | Low                 | Low                         | High                    | Low                 | None                                                                  |
| <b>Tomer 2001</b>     | Unclear                    | Unclear                | Unclear             | Unclear                     | Low                     | Unclear             | Baseline imbalances                                                   |
| <b>Wun 2013</b>       | Unclear                    | Unclear                | Unclear             | Low                         | Low                     | Low                 | Industry funded                                                       |
| Adegoke 2013          | Low                        | Unclear                | High                | High                        | High                    | Unclear             | No placebo used in control group                                      |
| Alvim 2005            | Unclear                    | Unclear                | Unclear             | Unclear                     | Low                     | Unclear             | None                                                                  |
| Charnigo 2017         | Unclear                    | Unclear                | Unclear             | Unclear                     | Unclear                 | Unclear             | Subset of a RCT database                                              |
| Daak 2013             | Low                        | Low                    | Low                 | Low                         | Low                     | Low                 | Industry funded                                                       |
| Daak 2018             | Unclear                    | Unclear                | Low                 | Low                         | Low                     | Unclear             | Baseline imbalances or not assessed                                   |
| de Abood 1997         | High                       | High                   | High                | High                        | Unclear                 | Unclear             | Baseline imbalances or not assessed; No placebo used in control group |
| Eke 2003              | Low                        | Low                    | High                | High                        | Low                     | Low                 | Baseline imbalances or not assessed                                   |

| Trial ID        | Random sequence generation | Allocation concealment | Blinding (personal) | Blinding (outcome assessor) | Incomplete outcome data | Selective reporting | Other bias                                                                     |
|-----------------|----------------------------|------------------------|---------------------|-----------------------------|-------------------------|---------------------|--------------------------------------------------------------------------------|
| Gail 1982       | Low                        | Low                    | Low                 | Low                         | Low                     | Unclear             | None                                                                           |
| Gupta 1995      | Low                        | Unclear                | Low                 | Low                         | Unclear                 | Unclear             | None                                                                           |
| Heeney 2016     | Low                        | Low                    | Low                 | Low                         | Low                     | Low                 | Industry funded; Any conflict of interest of authors                           |
| Isaacs 1972     | Unclear                    | Unclear                | Unclear             | Low                         | Unclear                 | Unclear             | Baseline imbalances or not assessed; Industry funded                           |
| Mann 1974       | Unclear                    | Unclear                | High                | High                        | Low                     | Unclear             | Risk of carry-over effect in crossover study; No placebo used in control group |
| Manrique 1987   | Unclear                    | Unclear                | Unclear             | Unclear                     | Low                     | High                | None                                                                           |
| Oski 1968       | Unclear                    | Unclear                | Low                 | Low                         | Low                     | Unclear             | Industry funded; Risk of carry-over effect in crossover study                  |
| Reid 2014       | Unclear                    | Low                    | Low                 | Low                         | High                    | Low                 | Industry funded; Any conflict of interest of authors                           |
| Vinchinsky 2010 | Unclear                    | Unclear                | High                | High                        | Unclear                 | Unclear             | Industry funded                                                                |
| Wambebe 2001    | Low                        | Low                    | Low                 | Unclear                     | Unclear                 | Unclear             | Risk of carry-over effect in crossover study                                   |
| Zago 1984       | Unclear                    | Unclear                | Unclear             | Unclear                     | High                    | Unclear             | Risk of carry-over effect in crossover study                                   |

\* Note: Trial bolded were base case studies; Trials shaded in grey were not included in the final network meta-analyses.

**Table 9: Newcastle-Ottawa quality assessment of non-randomized controlled trials included in the feasibility assessment**

|                  |     |   |     |     |     |     |     |     |     |   |
|------------------|-----|---|-----|-----|-----|-----|-----|-----|-----|---|
| Al Hashmi 2017   | --- | ★ | ★   | --- | ★   | --- | --- | --- | ★   | 4 |
| Brandalise 2017  | --- | ★ | ★   | --- | ★   | ★   | ★   | --- | ★   | 6 |
| Bridges 2017     | --- | ★ | ★   | --- | --- | --- | --- | --- | ★   | 3 |
| Bumma 2017       | --- | ★ | ★   | --- | ★   | --- | --- | --- | --- | 3 |
| Colombatti 2018  | ★   | ★ | ★   | --- | ★   | --- | --- | ★   | ★   | 6 |
| Di Maggio 2018   | ★   | ★ | ★   | --- | ★   | ★   | --- | ★   | ★   | 7 |
| Hoppe 2017       | ★   | ★ | --- | --- | ★   | --- | --- | --- | --- | 3 |
| Keikhaei 2015    | ★   | ★ | ★   | --- | --- | --- | --- | --- | ★   | 4 |
| Kwiatkowski 2017 | ★   | ★ | --- | --- | --- | --- | --- | ★   | ★   | 4 |
| LeBlanc 2016     | --- | ★ | ★   | ★   | --- | --- | --- | ★   | ★   | 5 |
| Lemonne 2017     | --- | ★ | ★   | --- | --- | --- | ★   | ★   | ★   | 5 |
| NCT01476696      | --- | ★ | --- | --- | --- | --- | --- | --- | ★   | 2 |
| Quarmyne 2017    | ★   | ★ | ★   | --- | ★   | --- | --- | ★   | --- | 5 |
| Rigano 2018      | ★   | ★ | ★   | --- | ★   | ★   | --- | ★   | ★   | 7 |
| Sethy 2018       | ★   | ★ | ★   | --- | --- | --- | --- | ★   | ★   | 5 |
| Styles 2010      | --- | ★ | ★   | ★   | --- | --- | --- | --- | --- | 3 |
| Youssry 2017     | ★   | ★ | ★   | --- | ★   | ★   | --- | ★   | ★   | 7 |

**Figure 1: Cochrane assessment of randomized controlled trials included in the feasibility assessment**

|                 | Random sequence generation | Allocation concealment | Blinding (participant/personnel) | Blinding (outcome assessor) | Incomplete outcome data | Selective reporting |
|-----------------|----------------------------|------------------------|----------------------------------|-----------------------------|-------------------------|---------------------|
| Adegoke 2013    | +                          | ?                      | +                                | +                           | +                       | ?                   |
| Alvim 2005      | ?                          | ?                      | ?                                | ?                           | +                       | ?                   |
| Arruda 2013     | +                          | +                      | ?                                | ?                           | +                       | ?                   |
| Ataga 2008      | +                          | +                      | +                                | +                           | +                       | +                   |
| Ataga 2011      | +                          | +                      | +                                | +                           | +                       | +                   |
| Ataga 2017      | +                          | +                      | +                                | +                           | ?                       | +                   |
| Bao 2008        | ?                          | ?                      | +                                | +                           | +                       | +                   |
| Cabannes 1984   | +                          | +                      | +                                | +                           | ?                       | +                   |
| Charnigo 2017   | ?                          | ?                      | ?                                | ?                           | ?                       | ?                   |
| Daak 2013       | +                          | +                      | +                                | +                           | +                       | +                   |
| Daak 2018       | ?                          | ?                      | +                                | +                           | +                       | ?                   |
| de Abood 1997   | +                          | +                      | +                                | +                           | ?                       | ?                   |
| Deceulaer 1982  | ?                          | ?                      | ?                                | +                           | ?                       | ?                   |
| Diop 2011       | +                          | +                      | +                                | +                           | +                       | +                   |
| Eke 2003        | +                          | +                      | +                                | +                           | +                       | +                   |
| Gail 1982       | +                          | +                      | +                                | +                           | +                       | ?                   |
| Glassberg 2017  | +                          | +                      | +                                | +                           | +                       | +                   |
| Gupta 1995      | +                          | ?                      | +                                | +                           | ?                       | ?                   |
| Heeney 2016     | +                          | +                      | +                                | +                           | +                       | +                   |
| Isaacs 1972     | ?                          | ?                      | ?                                | +                           | ?                       | ?                   |
| Mann 1974       | ?                          | ?                      | +                                | +                           | +                       | ?                   |
| Manrique 1987   | ?                          | ?                      | ?                                | ?                           | +                       | +                   |
| NCT02482298     | ?                          | ?                      | +                                | +                           | +                       | +                   |
| Niihara 2018    | ?                          | ?                      | +                                | +                           | +                       | +                   |
| Oski 1968       | ?                          | ?                      | +                                | +                           | +                       | ?                   |
| Pace 2003       | ?                          | ?                      | +                                | +                           | +                       | +                   |
| Reid 2014       | ?                          | +                      | +                                | +                           | +                       | +                   |
| Schlaeger 2017  | +                          | +                      | +                                | +                           | +                       | +                   |
| Sins 2017       | +                          | +                      | +                                | +                           | +                       | +                   |
| Tomer 2001      | ?                          | ?                      | ?                                | ?                           | +                       | ?                   |
| Vinchinsky 2010 | ?                          | ?                      | +                                | +                           | ?                       | ?                   |
| Wambebe 2001    | +                          | +                      | +                                | ?                           | ?                       | ?                   |
| Wun 2013        | ?                          | ?                      | ?                                | +                           | +                       | +                   |
| Zago 1984       | ?                          | ?                      | ?                                | ?                           | +                       | ?                   |

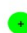 Low risk  
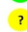 Unclear  
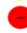 High risk



**Table 10: Study characteristics of trials included in the feasibility assessment**

| Trial         | Registry number | Treatment 1                     | Treatment 2                  | Treatment 3 | Treatment 4 | Blinding     | Design         | Follow-up                                                     | Country                                                                  |
|---------------|-----------------|---------------------------------|------------------------------|-------------|-------------|--------------|----------------|---------------------------------------------------------------|--------------------------------------------------------------------------|
| Adegoke 2013  | ---             | Lime juice + Routine oral drugs | Control (Routine oral drugs) | ---         | ---         | Open         | RCT            | 6 months                                                      | Nigeria                                                                  |
| Alvim 2005    | ---             | Piracetam                       | Placebo                      | ---         | ---         | Double-blind | RCT, crossover | 1 year (6 months, then crossover with 2 weeks washout period) | Saudi Arabia                                                             |
| Arruda 2013   | ---             | Placebo                         | Vitamins C and E             | ---         | ---         | Double-blind | RCT            | 180 days                                                      | Brazil                                                                   |
| Ataga 2008    | NCT00040677     | Senicapoc (high-dose)           | Senicapoc (low-dose)         | Placebo     | ---         | Double-blind | RCT            | 12 week                                                       | US                                                                       |
| Ataga 2011    | NCT00102791     | Senicapoc                       | Placebo                      | ---         | ---         | Double-blind | RCT            | 52 weeks                                                      | United States, Jamaica, Brazil, France, Trinidad and the United Kingdom. |
| Ataga 2017    | NCT01895361     | Crizanlizumab (high-dose)       | Crizanlizumab (low-dose)     | Placebo     | ---         | Double-blind | RCT (Phase 2)  | 52 weeks                                                      | Brazil, Jamaica, USA                                                     |
| Bao 2008      | ---             | Zinc                            | Placebo                      | ---         | ---         | Double-blind | RCT            | 3 months                                                      | US                                                                       |
| Cabannes 1984 | ---             | Ticlopidine                     | Placebo                      | ---         | ---         | Double-blind | RCT            | 6 months                                                      | Africa                                                                   |
| Charnigo 2017 | ---             | PF-04447943                     | Placebo                      | ---         | ---         | ---          | RCT (Phase 1b) | 29 days                                                       | ---                                                                      |
| Daak 2013     | ISRCTN80844630  | Omega-3                         | Placebo                      | ---         | ---         | Double-blind | RCT            | 1 year                                                        | Sudan                                                                    |
| Daak 2018     | ---             | AltemiaTM                       | Placebo                      | ---         | ---         | Double-blind | RCT (Phase 2)  | 2 months                                                      | USA                                                                      |

| Trial          | Registry number | Treatment 1                          | Treatment 2                        | Treatment 3                      | Treatment 4 | Blinding     | Design                                               | Follow-up                                                 | Country                           |
|----------------|-----------------|--------------------------------------|------------------------------------|----------------------------------|-------------|--------------|------------------------------------------------------|-----------------------------------------------------------|-----------------------------------|
| de Abood 1997  | ---             | DMPA                                 | Levonorgestrel + ethinyl estradiol | Surgical sterilized (injectable) | ---         | Double-blind | RCT                                                  | 12 months                                                 | Spain                             |
| Deceulaer 1982 | ---             | Medroxyprogesterone acetate          | Placebo                            | ---                              | ---         | Double-blind | RCT, crossover                                       | 2 years (9 months, then crossover after 6 months washout) | Jamaica                           |
| Diop 2011      | ---             | Sulfadoxine-pyrimethamine            | Placebo                            | ---                              | ---         | Open         | RCT                                                  | 3 months                                                  | Senegal                           |
| Eke 2003       | ---             | Placebo (Vitamin c)                  | Proguanil                          | ---                              | ---         | Open         | RCT (Phase 2)                                        | 9 months                                                  | Nigeria                           |
| Gail 1982      | ---             | Urea                                 | Control                            | ---                              | ---         | Double-blind | RCT (Phase 2)                                        | Average: 13.7 months                                      | Ghana                             |
| Glassberg 2017 | NCT02061202     | Mometasone furoate                   | Placebo                            | ---                              | ---         | Triple-blind | RCT                                                  | 16 weeks                                                  | US                                |
| Gupta 1995     | ---             | Zinc                                 | Placebo                            | ---                              | ---         | Double-blind | RCT (Phase 2)                                        | 1.5 years                                                 | India                             |
| Heeney 2016    | NCT01794000     | Prasugrel                            | Placebo                            | ---                              | ---         | Double-blind | RCT (Phase 3)                                        | A minimum of 9 months and a maximum of 24 months          | Americas, Europe, Asia and Africa |
| Isaacs 1972    | ---             | Steroid (Testosterone/ Progesterone) | Saline                             | ---                              | ---         | ---          | RCT, crossover (preliminary report before crossover) | 4-6 months                                                | Nigeria                           |
| Mann 1974      | ---             | Folic acid                           | Folic acid + Sodium bicarbonate    | ---                              | ---         | ---          | RCT, crossover                                       | 2 years (crossover after 1 year, no washout)              | UK                                |
| Manrique 1987  | ---             | Pentoxifylline                       | Placebo                            | ---                              | ---         | ---          | RCT (Phase 2)                                        | 6 weeks                                                   | Brazil                            |
| NCT02482298    | NCT02482298     | Ticagrelor 45 mg                     | Ticagrelor 10 mg                   | Placebo                          | ---         | Double-blind | RCT                                                  | 12 weeks                                                  | USA, Egypt, France, Italy,        |

| Trial          | Registry number | Treatment 1             | Treatment 2         | Treatment 3    | Treatment 4 | Blinding     | Design                   | Follow-up                                                      | Country                                           |
|----------------|-----------------|-------------------------|---------------------|----------------|-------------|--------------|--------------------------|----------------------------------------------------------------|---------------------------------------------------|
|                |                 |                         |                     |                |             |              |                          |                                                                | Kenya, Lebanon, UK, Turkey                        |
| Niihara 2018   | NCT01179217     | L-glutamine             | Placebo             | ---            | ---         | Double-blind | RCT (Phase 3)            | 48 weeks                                                       | USA                                               |
| Oski 1968      | ---             | Promazine hydrochloride | Placebo             | ---            | ---         | Double-blind | RCT, crossover           | 3 months                                                       | USA                                               |
| Pace 2003      | ---             | NAC (high-dose)         | NAC (mid-dose)      | NAC (low-dose) | Placebo     | Double-blind | RCT                      | 7 months                                                       | USA                                               |
| Reid 2014      | NCT01601340     | HQK-1001                | Placebo             | ---            | ---         | Double-blind | RCT                      | 48 weeks                                                       | United States, Lebanon, Egypt, Jamaica and Canada |
| Schlaeger 2017 | ---             | Pregabalin              | Placebo             | ---            | ---         | Double-blind | RCT                      | 3 months                                                       | USA                                               |
| Sins 2017      | NCT01849016     | NAC                     | Placebo             | ---            | ---         | Double-blind | RCT                      | 6 months                                                       | Netherlands, Belgium, UK                          |
| Styles 2010    | ---             | GMI-1070                | ---                 | ---            | ---         | ---          | Single-arm               | 1 month                                                        | USA                                               |
| Tomer 2001     | ---             | mehaden fish oil        | Placebo (olive oil) | ---            | ---         | Double-blind | RCT                      | 12 months                                                      | US                                                |
| Vichinsky 2010 | ---             | Transfusion             | Standard of care    | ---            | ---         | ---          | RCT                      | ---                                                            | USA                                               |
| Wambebe 2001   | ---             | Niprisan                | Placebo             | ---            | ---         | Phase 2      | RCT, crossover (Phase 2) | 13 months (6 months per treatment, 1-month washout in-between) | Nigeria                                           |
| Wun 2013       | NCT01167023     | Prasugrel               | Placebo             | ---            | ---         | Double-blind | RCT (Phase 2)            | 30 days                                                        | United States and Canada                          |
| Zago 1984      | ---             | Aspirin                 | Placebo             | ---            | ---         | ---          | RCT, crossover (Phase 2) | 10 months (5 months per treatment)                             | Brazil                                            |

| Trial            | Registry number | Treatment 1                                      | Treatment 2 | Treatment 3 | Treatment 4 | Blinding | Design                      | Follow-up        | Country    |
|------------------|-----------------|--------------------------------------------------|-------------|-------------|-------------|----------|-----------------------------|------------------|------------|
| Al Hashmi 2017   | ---             | Hydroxyurea                                      | ---         | ---         | ---         | ---      | Single-arm                  | 6 months         | Oman       |
| Brandalise 2017  | ---             | Methotrexate                                     | ---         | ---         | ---         | ---      | Single-arm                  | 12 weeks         | Brazil     |
| Bridges 2017     | ---             | GBT440                                           | ---         | ---         | ---         | ---      | Single-arm                  | 10 weeks         | Unclear    |
| Bumma 2017       | ---             | Scheduled outpatient red cell exchange programme | ---         | ---         | ---         | ---      | Single-arm                  | 1 year           | ---        |
| Colombatti 2018  | NCT02709681     | Hydroxyurea                                      | ---         | ---         | ---         | ---      | Single-arm                  | 1 years          | Italy      |
| Di Maggio 2018   | ---             | Hydroxyurea                                      | ---         | ---         | ---         | ---      | Single-arm                  | Mean: 6.6 years  | Italy      |
| Hoppe 2017       | NCT00508027     | Simvastatin                                      | ---         | ---         | ---         | ---      | Single-arm                  | 3 months         | USA        |
| Keikhaei 2015    | ---             | Hydroxyurea                                      | ---         | ---         | ---         | ---      | Single-arm                  | 1 year           | Iran       |
| Kwiatkowski 2017 | ---             | Deferiprone                                      | ---         | ---         | ---         | ---      | Single-arm                  | 1 year           | USA        |
| LeBlanc 2016     | NCT02709681     | Methadone                                        | ---         | ---         | ---         | ---      | Single-arm                  | Mean: 2.1 years  | USA        |
| Lemonne 2017     | ---             | Hydroxyurea                                      | ---         | ---         | ---         | ---      | Single-arm                  | 2 years          | Guadeloupe |
| NCT01476696      | NCT01476696     | Prasugrel                                        | ---         | ---         | ---         | ---      | Single-arm (Phase 2 part B) | 28 days          | USA        |
| Quarmyne 2017    | ---             | Hydroxyurea                                      | ---         | ---         | ---         | ---      | Single-arm                  | 3 months         | USA        |
| Rigano 2018      | ---             | Hydroxyurea                                      | ---         | ---         | ---         | ---      | Single-arm                  | Median: 7 years  | Italy      |
| Sethy 2018       | ---             | Hydroxyurea                                      | ---         | ---         | ---         | ---      | Single-arm                  | 12 months        | India      |
| Youssry 2017     | ---             | Hydroxyurea                                      | ---         | ---         | ---         | ---      | Single-arm                  | up to 120 months | Egypt      |

Note: Trial bolded were base case studies; Trials shaded in grey were not included in the final network meta-analyses.

**Table 11:** Eligibility criteria of RCTs included in the feasibility assessment

| Trial              | Interventions                                                                                                                                               | Age        | Genotype                  | History of pain/crises/complications                                                     | Status of hydroxyurea treatment | Prior transfusion (exclusion criteria) | Concurrent medications (exclusion criteria)                                                                                                                                                                                                                  |
|--------------------|-------------------------------------------------------------------------------------------------------------------------------------------------------------|------------|---------------------------|------------------------------------------------------------------------------------------|---------------------------------|----------------------------------------|--------------------------------------------------------------------------------------------------------------------------------------------------------------------------------------------------------------------------------------------------------------|
| Adegoke 2013       | Lime juice + Routine oral drugs (folic acid, vitamin B complex and proguanil) vs Control (Routine oral drugs (folic acid, vitamin B complex and proguanil)) | ---        | ---                       | Steady state (no painful episode, anemic crisis, or infection on the day of recruitment) | No hydroxyurea treatment        | ---                                    | Not on any other alternative medicine commonly used by some patients with SCA in Nigeria such as Aloe vera gel, Moringa oleifera, Solamine syrup, and Ciklavit (Cajanus cajan) suspension as well as Discrivite suspension and or Nicosan (Niprisan) capsule |
| Alvim 2005         | Piracetam vs Placebo                                                                                                                                        | 5-20 years | ---                       | ---                                                                                      | No hydroxyurea treatment        | Regular blood transfusion programmes   | ---                                                                                                                                                                                                                                                          |
| <b>Arruda 2013</b> | Placebo vs Vitamins C and E                                                                                                                                 | ≥ 18 years | HbSS or HbSβ <sup>0</sup> | ---                                                                                      | ---                             | ---                                    | Other investigational drugs in the last 12 months                                                                                                                                                                                                            |

| Trial             | Interventions                                                    | Age         | Genotype                                          | History of pain/crises/compl ications                                                                                   | Status of hydroxyurea treatment                                                                                         | Prior transfusion (exclusion criteria)                                                                                | Concurrent medications (exclusion criteria)                                                                                                                                                                                                               |
|-------------------|------------------------------------------------------------------|-------------|---------------------------------------------------|-------------------------------------------------------------------------------------------------------------------------|-------------------------------------------------------------------------------------------------------------------------|-----------------------------------------------------------------------------------------------------------------------|-----------------------------------------------------------------------------------------------------------------------------------------------------------------------------------------------------------------------------------------------------------|
| <b>Ataga 2008</b> | Senicapoc (high-dose) vs Senicapoc (low-dose) vs Placebo         | 18-60 years | HbSS                                              | ≥ 1 nacute sickle-related painful episode that had required hospitalization, but none in the 4 weeks prior to screening | Stable dose for a minimum of 3 months at study enrollment.                                                              | Received a transfusion within 30 days of enrollment or undergone an exchange transfusion within 60 days of enrollment | One or more nonallowed medications within 30 days of enrollment (eg, amiodarone, chlorperazine, disopyramide, dofetilide, haloperidol, procainamide, quinidine, risperidone, sotalol, thioridazine, trifluoperazine, warfarin sodium, and erythropoietin) |
| <b>Ataga 2011</b> | Senicapoc vs Placebo                                             | 16-65 years | HbSS, HbSC, HbSβ <sup>0</sup> , HbSβ <sup>+</sup> | ≥ 2 acute sickle-related painful crises in the previous 12 months                                                       | Received hydroxyurea for the preceding 12 months and their dose was stabilized for at least 3 months prior to the study | Participated in a chronic transfusion programme                                                                       | Received previous treatment with senicapoc                                                                                                                                                                                                                |
| <b>Ataga 2017</b> | Crizanlizumab (high-dose) vs Crizanlizumab (low-dose) vs Placebo | 16-65 years | HbSS, HbSC, HbSβ <sup>0</sup> , HbSβ <sup>+</sup> | 2-10 SCD-related pain crises in the 12 months before enrollment                                                         | ---                                                                                                                     | Undergoing long-term red-cell transfusion therapy                                                                     | ---                                                                                                                                                                                                                                                       |

| Trial                | Interventions                                                                  | Age        | Genotype | History of pain/crises/compl ications                                                                       | Status of hydroxyurea treatment                                 | Prior transfusion (exclusion criteria) | Concurrent medications (exclusion criteria)                      |
|----------------------|--------------------------------------------------------------------------------|------------|----------|-------------------------------------------------------------------------------------------------------------|-----------------------------------------------------------------|----------------------------------------|------------------------------------------------------------------|
| <b>Bao 2008</b>      | Zinc vs Placebo                                                                | ---        | HbSS     | ---                                                                                                         | No hydroxyurea treatment                                        | receiving > 6 transfusions per year    | ---                                                              |
| <b>Cabannes 1984</b> | Ticlopidine vs Placebo                                                         | ---        | ---      | ---                                                                                                         | ---                                                             | ---                                    | Received no antisickling treatment for 2 months before admission |
| Charnigo 2017        | PF-04447943 vs Placebo                                                         | ---        | SCD      | ---                                                                                                         | ---                                                             | ---                                    | ---                                                              |
| Daak 2013            | Omega-3 vs Placebo                                                             | ---        | ---      | Steady state, defined as no evidence of fever, infection, or crisis for .4 wk before the start of the study | No hydroxyurea treatment                                        | Presence of blood transfusion          | ---                                                              |
| Daak 2018            | AltemiaTM vs Placebo                                                           | 5–17 years | ---      | 2-10 documented sickle cell crises during the 12 months prior to screening                                  | Either not received, or were on a stable regimen of hydroxyurea | ---                                    | ---                                                              |
| de Abood 1997        | DMPA vs Levonorgestrel + ethinyl estradiol vs Surgical sterilized (injectable) | ---        | ---      | ---                                                                                                         | ---                                                             | ---                                    | ---                                                              |

| Trial                 | Interventions                           | Age        | Genotype                  | History of pain/crises/compl ications                | Status of hydroxyurea treatment | Prior transfusion (exclusion criteria)                                                                            | Concurrent medications (exclusion criteria)     |
|-----------------------|-----------------------------------------|------------|---------------------------|------------------------------------------------------|---------------------------------|-------------------------------------------------------------------------------------------------------------------|-------------------------------------------------|
| <b>Deceulaer 1982</b> | Medroxyprogester one acetate vs Placebo | ---        | ---                       | ---                                                  | ---                             | ---                                                                                                               | ---                                             |
| <b>Diop 2011</b>      | Sulfadoxine-pyrimethamine vs Placebo    | ---        | ---                       | ---                                                  | ---                             | ---                                                                                                               | ---                                             |
| Eke 2003              | Placebo (Vitamin c) vs Proguanil        | 1-16 years | HbSS                      | ---                                                  | ---                             | ---                                                                                                               | ---                                             |
| Gail 1982             | Urea vs Control                         | ---        | HbSS                      | ---                                                  | ---                             | ---                                                                                                               | ---                                             |
| <b>Glassberg 2017</b> | Mometasone furoate vs Placebo           | ≥ 15 years | HbSS or HbSβ <sup>0</sup> | < 15 ED visits for SCD pain over the prior 12 months | ---                             | ---                                                                                                               | ---                                             |
| Gupta 1995            | Zinc vs Placebo                         | > 5 years  | HbSS                      | ---                                                  | ---                             | ---                                                                                                               | Patients on drug therapy for some other disease |
| Heeney 2016           | Prasugrel vs Placebo                    | 2-18 years | HbSS, HbSβ <sup>0</sup>   | ≥2 VOC in the year prior to screening                | ---                             | History of chronic RBC transfusion for prevention of stroke or current chronic treatment with RBC for any reason. | ---                                             |

| Trial                   | Interventions                                   | Age         | Genotype                       | History of pain/crises/compl ications                                                                   | Status of hydroxyurea treatment                           | Prior transfusion (exclusion criteria)                      | Concurrent medications (exclusion criteria)                             |
|-------------------------|-------------------------------------------------|-------------|--------------------------------|---------------------------------------------------------------------------------------------------------|-----------------------------------------------------------|-------------------------------------------------------------|-------------------------------------------------------------------------|
| Isaacs 1972             | Steroid (Testosterone/Prog esterone) vs Saline  | ---         | HbSS                           | Moderately severe pain at least once in 3 months (with little or no fever or exacerbations of jaundice) | ---                                                       | ---                                                         | ---                                                                     |
| Mann 1974               | Folic acid vs Folic acid + Sodium bicarbonate   | 5-17 years  | HbSS, HbSC, HbS $\beta$        | Previously suffered painful crises                                                                      | ---                                                       | ---                                                         | ---                                                                     |
| Manrique 1987           | Pentoxifylline vs Placebo                       | ---         | HbSS                           | ---                                                                                                     | ---                                                       | ---                                                         | ---                                                                     |
| <b>NCT02482298 2017</b> | Ticagrelor 45 mg vs Ticagrelor 10 mg vs Placebo | 18-30 years | HbSS, HbS $\beta$ <sup>0</sup> | ---                                                                                                     | Dose must have been stable for 3 months                   | Treatment with chronic red blood cell transfusion therapy.  | Chronic treatment with anticoagulants or antiplatelet drugs             |
| <b>Niihara 2018</b>     | L-glutamine vs Placebo                          | > 5 years   | HbSS, HbS $\beta$ <sup>0</sup> | ≥ 2 pain crises (no upper limit) documented during the previous year                                    | Stable dose within 3 months and continue during the trial | Received any blood products within 3 weeks before screening | Received treatment with l-glutamine within 30 days before the screening |
| Oski 1968               | Promazine hydrochloride vs Placebo              | ---         | ---                            | ≥2 painful episodes during                                                                              | ---                                                       | ---                                                         | ---                                                                     |

| Trial                 | Interventions                                                  | Age         | Genotype                | History of pain/crises/complications                                                                     | Status of hydroxyurea treatment                                             | Prior transfusion (exclusion criteria)                                                                          | Concurrent medications (exclusion criteria) |
|-----------------------|----------------------------------------------------------------|-------------|-------------------------|----------------------------------------------------------------------------------------------------------|-----------------------------------------------------------------------------|-----------------------------------------------------------------------------------------------------------------|---------------------------------------------|
|                       |                                                                |             |                         | the 2 year period prior to study.                                                                        |                                                                             |                                                                                                                 |                                             |
| <b>Pace 2003</b>      | NAC (high-dose) vs NAC (mid-dose) vs NAC (low-dose) vs Placebo | > 15 years  | HbSS, HbSβ <sup>0</sup> | With dense cells greater than 6% and 2 or more VOC episodes per year for the 2 years prior to enrollment | ---                                                                         | Chronic transfusions                                                                                            | Investigational drug therapy                |
| Reid 2014             | HQK-1001 vs Placebo                                            | 12-60 years | HbSS, HbSβ              | ≥ 1 acute SCD-related complication or leg ulcers in 12 months                                            | No current (i.e., within 3 months prior to enrolment) hydroxyurea treatment | Regular transfusion program or transfusion in the preceding 3 months unless Hb A had decreased to less than 20% | ---                                         |
| <b>Schlaeger 2017</b> | Pregabalin vs Placebo                                          | 18-82 years | ---                     | Pain now score ≥ 4 on a 0-10 scale at registration                                                       | ---                                                                         | ---                                                                                                             | ---                                         |

| Trial             | Interventions                           | Age         | Genotype                                          | History of pain/crises/compl ications                     | Status of hydroxyurea treatment                                           | Prior transfusion (exclusion criteria)                             | Concurrent medications (exclusion criteria)                                                              |
|-------------------|-----------------------------------------|-------------|---------------------------------------------------|-----------------------------------------------------------|---------------------------------------------------------------------------|--------------------------------------------------------------------|----------------------------------------------------------------------------------------------------------|
| <b>Sins 2017</b>  | NAC vs Placebo                          | ≥ 12 years  | HbSS, HbSC, HbSβ <sup>0</sup> , HbSβ <sup>+</sup> | ≥ 1 VOC per year in the past 3 years                      | Stable dose for 6 months prior to study                                   | Chronic blood transfusion or transfusion in the preceding 3 months | Use of pain medication for sickle-cell related pains on more than 15 days per month in the past 6 months |
| Styles 2010       | GMI-1070                                | 18-50 years | HbSS and HBSB0thal                                | ---                                                       | ---                                                                       | ---                                                                | ---                                                                                                      |
| <b>Tomer 2001</b> | mehaden fish oil vs Placebo (olive oil) | ≥ 18 years  | ---                                               | Frequent pain episodes (≥3 events/year)                   | Not on hydroxyurea                                                        | ---                                                                | ---                                                                                                      |
| Vichinsky 2010    | Transfusions vs standard of care        | 21-55 years | ---                                               | ---                                                       | 30% on hydroxyurea on transfusion, 50% on hydroxyurea on standard of care | ---                                                                | ---                                                                                                      |
| Wambebe 2001      | Niprisan vs Placebo                     | 2-45 years  | HbSS                                              | ≥ 3 painful or vaso-occlusive crises in the previous year | ---                                                                       | ---                                                                | ---                                                                                                      |

| Trial                  | Interventions        | Age            | Genotype                                          | History of pain/crises/compl ications                                                                                       | Status of hydroxyurea treatment            | Prior transfusion (exclusion criteria) | Concurrent medications (exclusion criteria) |
|------------------------|----------------------|----------------|---------------------------------------------------|-----------------------------------------------------------------------------------------------------------------------------|--------------------------------------------|----------------------------------------|---------------------------------------------|
| <b>Wun 2013</b>        | Prasugrel vs Placebo | 18 to 55 years | HbSS, HbSC, HbSβ <sup>0</sup> , HbSβ <sup>+</sup> | Did not have a diagnosis of acute VOC within 30 days of the study screening visit                                           | Stable dose 30 days prior to randomization | ---                                    | ---                                         |
| Zago 1984              | Aspirin vs Placebo   | ---            | ---                                               | ---                                                                                                                         | ---                                        | ---                                    | ---                                         |
| Al Hashmi 2017         | Hydroxyurea          | ≥ 18 years     | ---                                               | > 3 admissions with VOC/year, history of acute chest syndrome, history of priapism, history of splenic sequestration crises | On hydroxyurea 5-10mg/kg/day               | Blood transfusion during the study     | ---                                         |
| <b>Brandalise 2017</b> | Methotrexate         | ---            | ---                                               | > 3 severe VOC episodes/year, that were refractory to opioids for periods longer than 3 weeks duration.                     | Under chronic hydroxyurea treatment        | ---                                    | ---                                         |
| Bridges 2017           | GBT440               | ---            | SCD and severe anemia, i.e.                       | ---                                                                                                                         | ---                                        | ---                                    | ---                                         |

| Trial             | Interventions                                    | Age        | Genotype                  | History of pain/crises/compl ications                              | Status of hydroxyurea treatment | Prior transfusion (exclusion criteria)                     | Concurrent medications (exclusion criteria)                                                                                                    |
|-------------------|--------------------------------------------------|------------|---------------------------|--------------------------------------------------------------------|---------------------------------|------------------------------------------------------------|------------------------------------------------------------------------------------------------------------------------------------------------|
|                   |                                                  |            | HB < 6.5 g/dL             |                                                                    |                                 |                                                            |                                                                                                                                                |
| <b>Bumma 2017</b> | Scheduled outpatient red cell exchange programme | ---        | ---                       | ---                                                                | ---                             | ---                                                        | ---                                                                                                                                            |
| Colombatti 2018   | Hydroxyurea                                      | ---        | ---                       | 2-3 vaso-occlusive crisis and/or hospitalizations in the last year | ---                             | ---                                                        | ---                                                                                                                                            |
| Di Maggio 2018    | Hydroxyurea                                      | ---        | ---                       | >3 painful VOC per year and/or >2 Acute Chest Syndrome             | New to hydroxyurea treatment    | ---                                                        | ---                                                                                                                                            |
| Hoppe 2017        | Simvastatin                                      | >10 years  | HbSS or HbSβ <sup>0</sup> | ≥ 3 vaso-occlusive pain episodes in the preceding year             | At a stable dose for ≥ 3 months | Red cell transfusion within the 30 days prior to enrolment | Current treatment with statins, amiodarone or other drugs with known metabolic interactions with statins (e.g. cytochrome P450 3A4 metabolism) |
| Keikhaei 2015     | Hydroxyurea                                      | 6-18 years | SCD                       | ---                                                                | ---                             | ---                                                        | Treatment other than hydroxyurea                                                                                                               |

| Trial            | Interventions | Age                                            | Genotype                | History of pain/crises/compl ications                                                                                 | Status of hydroxyurea treatment                  | Prior transfusion (exclusion criteria)                                                      | Concurrent medications (exclusion criteria)                                                                                                                                                                                                                                                                          |
|------------------|---------------|------------------------------------------------|-------------------------|-----------------------------------------------------------------------------------------------------------------------|--------------------------------------------------|---------------------------------------------------------------------------------------------|----------------------------------------------------------------------------------------------------------------------------------------------------------------------------------------------------------------------------------------------------------------------------------------------------------------------|
| Kwiatkowski 2017 | Deferiprone   | ---                                            | ---                     | ---                                                                                                                   | ---                                              | ---                                                                                         | ---                                                                                                                                                                                                                                                                                                                  |
| LeBlanc 2016     | Methadone     | ---                                            | ---                     | > 5 pain events per year                                                                                              | ---                                              | ---                                                                                         | ---                                                                                                                                                                                                                                                                                                                  |
| Lemonne 2017     | Hydroxyurea   | ---                                            | ---                     | Absence of acute episodes (infection, VOC, ACS, stroke, priapism) at least one month before inclusion into the study. | ---                                              | No blood transfusions in the previous three months                                          | ---                                                                                                                                                                                                                                                                                                                  |
| NCT01476696      | Prasugrel     | ≥2 to <18 years of age and ≥ 12 kg body weight | HbSS, HbSβ <sup>0</sup> | ---                                                                                                                   | A stable dose for the 60 days prior to enrolment | Treatment with packed RBC or whole blood transfusion therapy within 30 days prior to dosing | Any nonsteroidal anti-inflammatory drug (NSAID) use within 5 days prior to screening or Any aspirin, warfarin, thienopyridine, or other antiplatelet medication use within 10 days prior to dosing or Anticipated use of aspirin, warfarin, thienopyridine, or other antiplatelet medication during the study period |

| Trial             | Interventions | Age        | Genotype                | History of pain/crises/compl ications                                  | Status of hydroxyurea treatment      | Prior transfusion (exclusion criteria) | Concurrent medications (exclusion criteria) |
|-------------------|---------------|------------|-------------------------|------------------------------------------------------------------------|--------------------------------------|----------------------------------------|---------------------------------------------|
| Quarmyne 2017     | Hydroxyurea   | ---        | HbSS, HbSβ <sup>0</sup> | ---                                                                    | ---                                  | Concurrent chronic transfusion         | ---                                         |
| Rigano 2018       | Hydroxyurea   | ---        | ---                     | 2–3 VOC and/or acute chest syndrome in the year prior                  | Received hydroxyurea therapy         | ---                                    | ---                                         |
| <b>Sethy 2018</b> | Hydroxyurea   | ≥ 18 years | HbSS                    | > 2 attacks of VOC per year and/or rate of transfusion 1–2 units/month | ---                                  | ---                                    | ---                                         |
| Youssry 2017      | Hydroxyurea   | ---        | ---                     | ---                                                                    | On hydroxyurea ≥3 consecutive months | Chronic blood transfusion protocol     | ---                                         |

\* - VOC: vaso-occlusive crisis; SCD: sickle cell disease; ED: emergency department; Note: Trial bolded were base case studies; Trials shaded in grey were not included in the final network meta-analyses.

## A.4 Outcome definitions

**Table 12: Definitions of crisis used in 5 RCTs included in adult network**

| Study        | Treatments                                                                                | Crisis                                                                                                                                                                                                                                                                                                                                                                                                                                                                                                                                                                                                                                                                                                                   |
|--------------|-------------------------------------------------------------------------------------------|--------------------------------------------------------------------------------------------------------------------------------------------------------------------------------------------------------------------------------------------------------------------------------------------------------------------------------------------------------------------------------------------------------------------------------------------------------------------------------------------------------------------------------------------------------------------------------------------------------------------------------------------------------------------------------------------------------------------------|
| Ataga 2017   | Placebo, High-dose Crizanlizumab, Low-dose Crizanlizumab                                  | Sickle cell–related pain crises were defined as acute episodes of pain, with no medically determined cause other than a vaso-occlusive event, that resulted in a medical facility visit and treatment. with oral or parenteral narcotic agents or with a parenteral nonsteroidal anti-inflammatory drug. The acute chest syndrome, hepatic sequestration, splenic sequestration, and priapism were also considered to be crisis events.                                                                                                                                                                                                                                                                                  |
| Ataga 2011   | Placebo, senicapoc                                                                        | A painful crisis was defined as an episode of acute pain with no cause other than a vaso-occlusive event that required a medical facility visit and treatment with oral or parenteral narcotics, or parenteral non-steroidal anti-inflammatory drugs. Included in the definition of painful crisis were acute chest syndrome, hepatic sequestration, splenic sequestration, priapism, stroke and death (with the exception of homicide, suicide, or accidental death). To ensure consistency across sites, all protocol-defined sickle-related painful crises identified by the Investigators that resulted in a visit to a medical facility were adjudicated by an independent, blinded, Crisis Review Committee (CRC). |
| Ataga 2008   | Placebo, senicapoc (low-dose), senicapoc (high-dose)                                      | An independent, blinded crisis review committee adjudicated all sickle cell painful crises and related adverse event data (Document S1). A painful crisis was defined as a period of severe pain (with no explanation other than SCD) lasting 4 or more hours in duration, requiring a visit to a health care facility, and requiring parenteral opiate or other narcotic for relief.                                                                                                                                                                                                                                                                                                                                    |
| Pace 2003    | Placebo, NAC (low-dose) 600 mg/day, NAC (mid-dose) 1200mg/day, NAC (high-dose) 2400mg/day | Defined as a visit to a medical facility that lasted more than 4 hr for acute pain related to vaso-occlusion requiring parenteral narcotics. The occurrence of acute chest syndrome, priapism, splenic, or hepatic sequestration was also counted as a VOC episode. Acute chest syndrome included those subjects with chest wall pain and a new infiltrate on chest X ray.                                                                                                                                                                                                                                                                                                                                               |
| Niihara 2018 | Placebo, L-glutamine                                                                      | A pain crisis was defined as pain leading to treatment with a parenterally administered narcotic or ketorolac in an emergency department (ED) (or outpatient treatment center) or during hospitalization.                                                                                                                                                                                                                                                                                                                                                                                                                                                                                                                |

## A.5 Additional risk of bias results

Overall, the RCTs were considered to have low risk of bias based on assessment using the Cochrane Collaboration's tool. Almost 50% were at unclear risk of bias due to allocation concealment, selective reporting, and random sequence generation. Also, 10-15% were at high risk of bias due to incomplete outcome data, blinding of outcome assessor, and blinding of personnel. Full results are in the appendix.

Overall, the single-arm studies were at high risk of bias due on several domains of the Newcastle-Ottawa scale (Figure 4): 93.7% at high risk of bias due to outcome of interest not being present at start, 87.5% at high risk of bias due to assessment of outcome, and 75% at high risk of bias due to comparability on additional factors. Also, almost 50% were at high risk of bias due to representativeness of exposed cohort, comparability on basic factors, or the follow-up not being long enough. This high risk of bias further discourages use of the single-arm studies for analysis.

Figure 2: Cochrane risk of bias assessment of 9 randomized controlled studies included in network meta-analysis

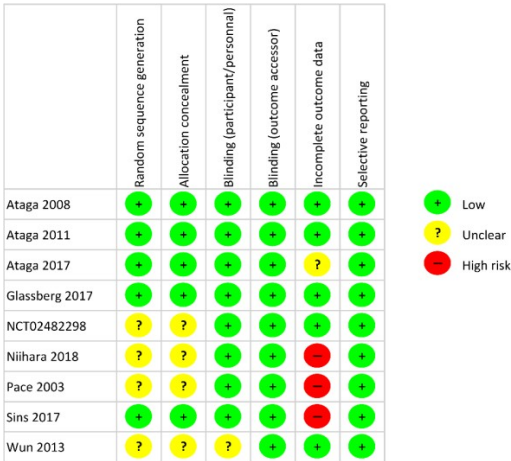

**Figure 3: Cochrane risk of bias assessment across all studies included in review presented as percentages across studies.**

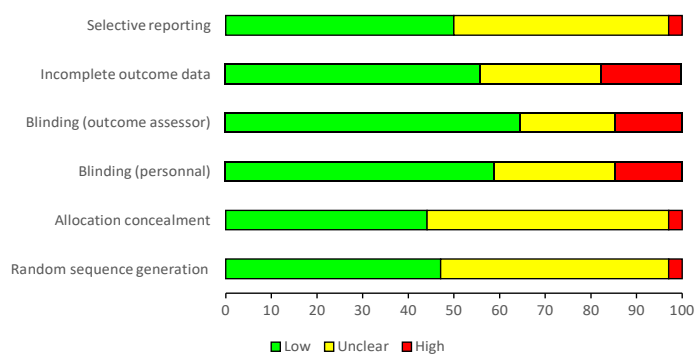

**Figure 4: Newcastle-Ottawa quality assessment of non-randomized trials presented as percentages across studies.**

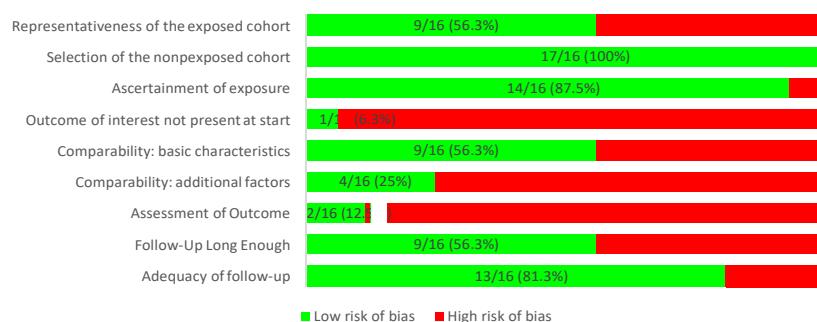



A.6 Table of characteristics and references for of all studies identified by SLR

| Author/Year/Country<br>Ref/Enrolment<br>/NCT registry | Design<br>Total N of PT<br>(N of female);<br>N of arm                     | Main in/exclusion criteria                                                                                                                                                                                                                                     | Participants                                                   |                                                               |                                |                                                      |                                                                                                    | Interventions                                                                                             |          |                                 | Sponsor                 | Pub<br>type |
|-------------------------------------------------------|---------------------------------------------------------------------------|----------------------------------------------------------------------------------------------------------------------------------------------------------------------------------------------------------------------------------------------------------------|----------------------------------------------------------------|---------------------------------------------------------------|--------------------------------|------------------------------------------------------|----------------------------------------------------------------------------------------------------|-----------------------------------------------------------------------------------------------------------|----------|---------------------------------|-------------------------|-------------|
|                                                       |                                                                           |                                                                                                                                                                                                                                                                | Age (years) <sup>†</sup>                                       | Total N of SCD<br>types (n, %)                                | Total N of<br>HU use<br>(n, %) | Baseline<br>pain/crisis/VOC<br>(n or %) <sup>†</sup> | Other baseline<br>characteristics<br>(n or %) <sup>†</sup>                                         | Group                                                                                                     | Duration | Other<br>concomitant<br>therapy |                         |             |
|                                                       |                                                                           |                                                                                                                                                                                                                                                                | Race (n, %) <sup>†</sup>                                       |                                                               |                                |                                                      |                                                                                                    |                                                                                                           |          |                                 |                         |             |
| Schlaeger<br>2017<br>USA<br><br>[1]                   | RCT, double-<br>blind                                                     | 1. 18-82 years<br>2. history of SCD pain that was not<br>well controlled (pain now score ≥ 4<br>on a 0-10 scale at registration)                                                                                                                               | Adults                                                         | HbSS: 15 (68%)<br>HbSC: 6 (27%)<br>HbSβ <sup>0</sup> : 1 (5%) | NR                             | NR                                                   | NR                                                                                                 | 1. Pregabalin 75mg BID<br>oral (n=11)<br>2. Placebo (n=11)                                                | 3 months | NR                              | NR                      | JA          |
|                                                       | Single centre<br>22 (16); 2                                               | Exclusion: renal impairment                                                                                                                                                                                                                                    | Mean (SD): 33.1<br>(9.9)<br><br>African american:<br>11 (100%) |                                                               |                                |                                                      |                                                                                                    |                                                                                                           |          |                                 |                         |             |
| Hoppe 2017<br>USA<br><br>[2]                          | Single-arm                                                                | 1. >10 years<br>2. history of ≥ 3 vaso-occlusive pain<br>episodes requiring treatment with a<br>prescribed oral or parenteral<br>analgesic in the preceding year<br>3. Patients receiving treatment with<br>HU at a stable dose for ≥3 months<br>were eligible | Adults and<br>children                                         | HbSS: 17 (89%)<br>HbSβ <sup>0</sup> : 2 (11%)                 | 10 (53%)                       | NR                                                   | NR                                                                                                 | Simvastatin (n=19*) OD<br>oral                                                                            | 3 months | NR                              | DDCF, NHLBI<br>and NCRR | JA          |
|                                                       | Single centre<br>24 (13); 1<br><br>NCT00508027                            |                                                                                                                                                                                                                                                                | Overall mean:<br>18.5 (range 10-<br>34)                        |                                                               |                                |                                                      |                                                                                                    | Dose adjusted by weight:<br>40 mg (weight >60 kg); 30<br>mg (weight 45–60 kg); 25<br>mg (weight 35–44 kg) |          |                                 |                         |             |
| Glassberg<br>2017<br>USA<br><br>[3]                   | RCT, triple-<br>blind                                                     | 1. HbSS or HbSβ <sup>0</sup><br>2. ≥15 years<br>3. self-report of cough or wheeze<br>over the preceding two months                                                                                                                                             | Adults and<br>adolescents                                      | HbSS: 50 (96%)<br>HbSβ <sup>0</sup> : 2 (4%)                  | 34 (65%)                       | NR                                                   | Prior ED<br>Utilization (past<br>12 months)                                                        | 1. Mometasone furoate<br>220mcg OD inhale (n=35*)<br>2. Placebo (n=17*)                                   | 16 weeks | NR                              | NHLBI                   | JA          |
|                                                       | Single centre<br>54 (23); 2<br><br>Feb 2014 to<br>Oct 2016<br>NCT02061202 | Exclusion: Diagnosis of asthma,<br>incarceration, pregnancy, ≥15 ED<br>visits for SCD pain over the prior 12<br>months and discharge from the<br>hospital within the previous 7 days                                                                           | Mean (SD):<br>30(8.56)                                         |                                                               |                                |                                                      | 0-5 visits: 71%<br>6-10 visits: 24%<br>11-15 visits: 6%<br><br>In addition to standard SCD<br>care |                                                                                                           |          |                                 |                         |             |

|                                                                                              |                                                      |                                                                                                                                                                                                                                                                                                                                                                      |                                                                                                                                      |                                                                                                                  |           |                                                                                 |                                     |                                                                                                                                                                                                                           |           |    |                                                          |             |
|----------------------------------------------------------------------------------------------|------------------------------------------------------|----------------------------------------------------------------------------------------------------------------------------------------------------------------------------------------------------------------------------------------------------------------------------------------------------------------------------------------------------------------------|--------------------------------------------------------------------------------------------------------------------------------------|------------------------------------------------------------------------------------------------------------------|-----------|---------------------------------------------------------------------------------|-------------------------------------|---------------------------------------------------------------------------------------------------------------------------------------------------------------------------------------------------------------------------|-----------|----|----------------------------------------------------------|-------------|
| Ataga 2017<br>Brazil,<br>Jamaica, USA<br><br>[4-8]<br>Aug 2013 to<br>Jan 2015<br>NCT01895361 | RCT, double-blind<br><br>Multicentre<br>198 (109); 3 | 1. HbSS, HbSC, HbSβ <sup>0</sup> , HbSβ <sup>+</sup><br>2. 16-65 years<br>3. two to ten SCD-related pain crises in the 12 months before the enrolment<br><br>Exclusion: long-term red-cell transfusion                                                                                                                                                               | Adults and adolescents<br><br>Median: 26 (range 16-56)<br><br>Black, or African American: 60 (90%)<br>White: 4 (6%)<br>Other: 3 (4%) | HbSS: 141 (71%)<br>HbSC: 32 (16%)<br>HbSβ <sup>0</sup> : 12 (6%)<br>HbSβ <sup>+</sup> : 10 (5%)<br>Other: 3 (2%) | 123 (62%) | N of SCD-related pain crises during previous 12 months<br>2-4: 63%<br>5-10: 37% | NR                                  | 1. High-dose Crizanlizumab 5 mg/kg IV (n=67)<br>2. Low-dose Crizanlizumab 2.5 mg/kg IV (n=66)<br>3. Placebo (n=65)<br><br>Two doses 2 weeks apart (loading dose) and then every 4 weeks. A total of 14 doses for 50 weeks | 52 weeks  | NR | Selexys Pharmaceuticals, NHLBI and OOPD                  | JA, JA supp |
| Lemonne 2017<br>Guadeloupe<br><br>[9]                                                        | Single-arm<br><br>Single centre<br>28 (13); 1        | 1. at the beginning of the HU therapy<br>2. patients were at steady state, i.e., no blood transfusions in the previous three months and absence of acute episodes (infection, VOC, ACS, stroke, priapism) at least one month before inclusion into the study.<br><br>Exclusion: renal insufficiency, hepatic insufficiency or human immunodeficiency virus infection | Adults<br><br>Overall mean: 37.0(SD 11.6)                                                                                            | All SCA (50% with α-thalassemia)                                                                                 | N/A       | Frequent hospitalized VOC: 14 (50%)<br><br>N of ACS ≥ 1: 10 (36%)               | NR                                  | HU Therapy (n=28)                                                                                                                                                                                                         | 2 years   | NR | Region of Guadeloupe.                                    | JA          |
| Quarmyne 2017<br>USA<br><br>[10]<br>2009-2011                                                | Single-arm<br><br>Retrospective<br>134 (74); 1       | 1. HbSS, HbSβ <sup>0</sup><br>2. started HU in 2009-2011<br><br>Exclusion: concurrent chronic transfusion and hydroxyurea therapy, underwent bone marrow transplant, no follow-up data                                                                                                                                                                               | Adults and Children<br><br>Overall Median: 7.5<br><br>≤5 years: 39%<br>6-10 years: 33%<br>11-15 years: 20%<br>>15 years: 8%          | NR                                                                                                               | None      | NR                                                                              | NR                                  | HU oral (n=78*)<br><br>Dose: 20 mg/kg/day (initially), followed by dose escalation every 2 months to 25–30 mg/kg/day or maximum tolerated dose if lower                                                                   | ~3 months | NR | NCATS, NIH and the Abraham J. & Phyllis Katz Foundation. | JA          |
| Daak 2018<br>USA<br><br>[11]                                                                 | RCT, double-blind<br><br>Multicentre<br>67(NR); 2    | 1. 5–17 years<br>2. two and ten (inclusive) documented SCC during the 12 months prior to screening<br>3. either not received, or were on a stable regimen of hydroxyurea (HU)                                                                                                                                                                                        | Children and Adolescents<br><br>NR                                                                                                   | NR                                                                                                               | 51 (76%)  | NR                                                                              | NR                                  | 1. Altemia <sup>TM</sup> (n=50)<br>2. Placebo (n=17)                                                                                                                                                                      | 2 months  | NR | NR                                                       | CA          |
| Bridges 2017<br>Unclear                                                                      | Single-arm                                           | Patients with SCD and severe anaemia, i.e. Hb < 6.5 g/dL                                                                                                                                                                                                                                                                                                             | Adults                                                                                                                               | HbSS:6 (86%)<br>HbSβ: 1 (14%)                                                                                    | NR        | Baseline VOC admission (total n): 15                                            | Baseline transfusions (total n): 24 | GBT440 900mg OD (n=7)                                                                                                                                                                                                     | 10 weeks  | NR | NR                                                       | CA          |

|                                                    |                                 |                                                                                                                                                                                                                                                                                                                                                                                                                |                                                               |                                                                              |                |                                                                                                                         |                                                                                        |                                                                   |           |                                                                                                                |                                                                                        |    |  |
|----------------------------------------------------|---------------------------------|----------------------------------------------------------------------------------------------------------------------------------------------------------------------------------------------------------------------------------------------------------------------------------------------------------------------------------------------------------------------------------------------------------------|---------------------------------------------------------------|------------------------------------------------------------------------------|----------------|-------------------------------------------------------------------------------------------------------------------------|----------------------------------------------------------------------------------------|-------------------------------------------------------------------|-----------|----------------------------------------------------------------------------------------------------------------|----------------------------------------------------------------------------------------|----|--|
| [12]                                               | Single centre<br>7(4); 1        |                                                                                                                                                                                                                                                                                                                                                                                                                | Overall mean:<br>48.6(SD 15.8)                                |                                                                              |                |                                                                                                                         |                                                                                        |                                                                   |           |                                                                                                                |                                                                                        |    |  |
| Charnigo 2017<br>Unclear                           | RCT (phase<br>1b)               | Stable SCD patients                                                                                                                                                                                                                                                                                                                                                                                            | NR                                                            | NR                                                                           | NR             | NR                                                                                                                      | NR                                                                                     | 1. PF-04447943 25mg or<br>5mg BID oral (n=22)<br>2. Placebo (n=7) | 29 days   | NR                                                                                                             | Pfizer                                                                                 | CA |  |
| [13]                                               | Retrospective<br>29 (NR); 2     |                                                                                                                                                                                                                                                                                                                                                                                                                |                                                               |                                                                              |                |                                                                                                                         |                                                                                        |                                                                   |           |                                                                                                                |                                                                                        |    |  |
| Sins 2017<br>Netherlands,<br>Belgium, UK           | RCT, double-<br>blind           | 1. HbSS, HbSC, HbSβ <sup>o</sup> , HbSβ <sup>-</sup><br>2. ≥ 12 years<br>3. History of at least 1.0 VOC per<br>year in the past 3 years                                                                                                                                                                                                                                                                        | Adults<br><br>Mean (SD):<br>28.4(8.9)                         | HbSS/HbSβ <sup>o</sup> : 46<br>(69%)<br>HbSC/HbSβ <sup>-</sup> : 21<br>(31%) | 28 ((42%)      | N of VOC over<br>past three years<br>Median: 11 (IQR<br>6-20)                                                           | Number of<br>hospital<br>admission over<br>past three years<br>Median: 3 (IQR 1-<br>6) | 1. Placebo (n=40*)<br>2. NAC 600mg BID oral<br>(n=27*)            | 6 months  | NR                                                                                                             | ZonMw, the<br>Academic<br>Medical Centre,<br>JANIVO<br>Stichting, Egbers<br>Stichting, | JA |  |
| [14, 15]<br>Apr 2013 to<br>Nov 2015<br>NCT01849016 | Multicentre<br>96 (40); 2       | Exclusion: Chronic blood transfusion<br>or transfusion in the preceding 3<br>months, VOC in the last 4 weeks,<br>pregnancy, active gastric/duodenal<br>ulcers, HU treatment with unstable<br>dose in the last 3 months or started<br>on HU shorter than 6 months prior to<br>study, use of pain medication for<br>SCD-related pains on more than 15<br>days per month in the past 6 months,<br>poor compliance | Latin-<br>America/Caribbea<br>n: 17 (43%)<br>Africa :23 (57%) |                                                                              |                |                                                                                                                         |                                                                                        |                                                                   |           |                                                                                                                |                                                                                        |    |  |
| Niihara 2018<br>US                                 | RCT, double-<br>blind (phase 3) | 1. > 5 years<br>2. had had at least two pain crises<br>(no upper limit) documented during<br>the previous year<br>3. HU at stable dose within 3 months<br>and continue during the trial                                                                                                                                                                                                                        | Adults and<br>children<br><br>Mean (SD):<br>21.4(12.42)       | SCA: 207 (90%)<br>HbSβ <sup>o</sup> : 21 (9%)<br>HbSβ <sup>-</sup> : 2 (1%)  | 153<br>(66.5%) | N of SCD pain<br>crises in the year<br>before trial<br><br>0-1: 0.7%<br>2-5: 84.2%<br>6-9: 9.9%<br>≥ 10: 5.3%           | NR                                                                                     | 1. L- glutamine 0.3 g/kg BID<br>oral (n=152)<br>2. placebo (n=78) | 48 weeks  | NR                                                                                                             | Emmaus Medical                                                                         | JA |  |
| [16-20]<br>Jun 2010 to<br>Dec 2013<br>NCT01179217  | Multicentre<br>230 (124); 2     |                                                                                                                                                                                                                                                                                                                                                                                                                | Black: 144 (95%)<br>Hispanic: 4 (3%)<br>Other: 4 (3%)         |                                                                              |                |                                                                                                                         |                                                                                        | Maximum dose: 30mg                                                |           |                                                                                                                |                                                                                        |    |  |
| Sethy 2018<br>India                                | Single-arm                      | 1. HbSS<br>2. ≥ 18 years<br>3. > 2 attacks of VOC per year and/or<br>rate of transfusion 1–2 units/month<br>were included in the study                                                                                                                                                                                                                                                                         | Adults                                                        | All HbSS                                                                     | N/A            | 64% presented<br>with repeated<br>VOC, 13% with<br>transfusion<br>dependency and<br>23% with both the<br>above features | NR                                                                                     | HU 10 mg/kg/day oral<br>(n=128*)                                  | 12 months | All the patients<br>were advised to<br>take folic acid<br>(5 mg/day) and<br>ensure<br>adequate fluid<br>intake | NR                                                                                     | JA |  |
| [21]<br>2013 to 2016                               | Single site<br>142 (46); 1      | Exclusion: pregnancy, human<br>immunodeficiency virus infection or<br>medications that could potentially<br>enhance HU toxicity, abnormal serum<br>Cr/ALT levels                                                                                                                                                                                                                                               |                                                               |                                                                              |                |                                                                                                                         |                                                                                        |                                                                   |           |                                                                                                                |                                                                                        |    |  |

|                                                                         |                                                           |                                                                                                                                                                 |                                                                                                                                   |                                                                                                                            |          |    |    |                                                                                                              |                                                     |                                                                                        |    |                |
|-------------------------------------------------------------------------|-----------------------------------------------------------|-----------------------------------------------------------------------------------------------------------------------------------------------------------------|-----------------------------------------------------------------------------------------------------------------------------------|----------------------------------------------------------------------------------------------------------------------------|----------|----|----|--------------------------------------------------------------------------------------------------------------|-----------------------------------------------------|----------------------------------------------------------------------------------------|----|----------------|
| Di Maggio<br>2018<br>Italy<br><br>[22]<br>January 2000<br>to April 2014 | Single-arm<br><br>Retrospective<br>140 (71); 1            | 1. start HU treatment<br>2. >3 painful vaso-occlusive crises<br>per year and/or >2 Acute Chest<br>Syndrome                                                      | Adults and<br>children<br><br>Median(range):<br>35 (0.4-61)                                                                       | HbSS: 25 (18%)<br>HbSβ <sup>0</sup> : 54 (39%)<br>HbSβ <sup>+</sup> : 56 (40%)<br>HbSα-β: 4 (3%)<br>HbSLepore: 1<br>(0.7%) | 90 (64%) | NR | NR | HU oral (n=140)<br><br>Starting dose: 10 mg/kg<br>daily<br>Titration: increased at a<br>rate of 5 mg/kg/week | Mean<br>follow-up:<br>6.6 years                     | NR                                                                                     | NR | JA, JA<br>supp |
| Youssry 2017<br>Egypt<br><br>[23]                                       | Single-arm<br><br>Retrospective<br>60 (37); 1             | Patients who were on HU therapy for<br>at least 3 consecutive months<br><br>Exclusion: Chronic blood transfusion,<br>chronic disabling hepatic/renal<br>disease | Adults and<br>children<br><br>Mean: 12.8 (SD<br>5.5) (range 4 to<br>24)                                                           | HbSS: 27 (45%)<br>HbSβ: 33 (55%)                                                                                           | N/A      | NR | NR | HU 15-30mg/kg/day oral<br>(n=60)                                                                             | Up to 120<br>months                                 | NR                                                                                     | NR | JA             |
| Bumma 2017<br>USA<br><br>[24]<br>1/1/2000 to<br>1/15/2016               | Single-arm<br><br>Retrospective<br>104 (60); 1            | NR                                                                                                                                                              | Adults and<br>Adolescents<br><br>Median (range):<br>24(15-62)                                                                     | HbSS: 89 (86%)                                                                                                             | 13%      | NR | NR | Scheduled outpatient red<br>cell exchange (n=104)                                                            | 1 year                                              | NR                                                                                     | NR | CA             |
| Kwiatkowski<br>2017<br>USA<br><br>[25]                                  | Single-arm<br><br>Registry data<br>291 (166); 0           | Inclusion on a patient registry has<br>been maintained for all US patients<br>who receive deferiprone                                                           | Adults and<br>children<br><br>Mean: 29.5<br>(SD15.7)<br><br>≤ 18years: 79                                                         | NR                                                                                                                         | NR       | NR | NR | Deferiprone oral (n=291)                                                                                     | Mean: 1.3<br>years<br>(range 0-<br>4.1)             | NR                                                                                     | NR | CA             |
| Rigano 2018<br>Italy<br><br>[26]                                        | Single-arm<br><br>Retrospective<br>cohort<br>652 (302); 1 | 1. On HU therapy<br>2. The indication for HU initiation was<br>2–3 vaso-occlusive crisis and/or<br>acute chest syndrome in the year<br>prior                    | Adults and<br>children<br><br>Mean: 24.5 (SD<br>15)<br>Median: 24<br>(range 1-67)<br><br>Caucasian:<br>400/621<br>Africa: 221/621 | HbSS: 277 (47%)<br>HbSβ <sup>0</sup> : 167 (28%)<br>HbSβ <sup>+</sup> : 131 (20%)<br>Other: 19 (3%)<br><br>Total N: 594    | N/A      | NR | NR | HU oral (n=628*)<br><br>10 mg/kg/day, and<br>adjusted or escalated<br>according to tolerance                 | Median<br>duration: 7<br>years<br>(range <1-<br>29) | Folic acid was<br>concomitantly<br>used in 71.3%<br>of patients<br>(n/N =<br>388/448). | NR | JA             |

|                                      |                                                                             |                                                                                                                                                                                                                                                                                                                   |                                                                                                                                                                                                                                   |                                                                                                                   |           |                                                                                        |                       |                                       |                   |    |                                                              |    |
|--------------------------------------|-----------------------------------------------------------------------------|-------------------------------------------------------------------------------------------------------------------------------------------------------------------------------------------------------------------------------------------------------------------------------------------------------------------|-----------------------------------------------------------------------------------------------------------------------------------------------------------------------------------------------------------------------------------|-------------------------------------------------------------------------------------------------------------------|-----------|----------------------------------------------------------------------------------------|-----------------------|---------------------------------------|-------------------|----|--------------------------------------------------------------|----|
| Al Hashmi<br>2017<br>Oman<br>[27]    | Single-arm<br><br>Single centre<br>18 (6); 1                                | 1. Aged ≥ 18 years<br>2. on HU 5-10mg/kg/day<br>3. history of more than three admissions with vaso-occlusive crises /year, history of acute chest syndrome, history of priapism, history of splenic sequestration crises<br><br>Exclusion: pregnancy, blood transfusion during the study, follow-up of < 6 months | Adults                                                                                                                                                                                                                            | NR                                                                                                                | N/A       | NR                                                                                     | NR                    | HU 5-10mg/kg/day oral (n=18)          | At least 6 months | NR | NR                                                           | CA |
| Colombatti<br>2018<br>Italy<br>[28]  | Single arm<br><br>Multicentre<br>204 (20); 1                                | 1. On HU therapy                                                                                                                                                                                                                                                                                                  | Children and adolescents<br><br>Overall mean: 7.68 (range 11-221 months)<br><br>Nigeria: 65 (32%)<br>Ghana: 32 (16%)<br>Senegal: 12 (6%)<br>Italy and Albania: 37 (18%)<br>Central America and India: 10 (5%)<br>Unknown: 10 (5%) | HbSS:172 (84%)<br>HbSβ <sup>0</sup> : 22 (11%)<br>HbSC: 8 (4%)<br>HbSβ <sup>-</sup> : 3 (1.5%)<br>Other: 1 (0.5%) | N/A       | NR                                                                                     | NR                    | HU therapy (varied by centre) (n=204) | 1 year            | NR | NR                                                           | JA |
| Brandalise<br>2017<br>Brazil<br>[29] | Single arm<br><br>Single centre<br>14 (5); 1<br><br>RBR-2s9xvn              | 1. Under chronic hydroxyurea treatment<br>2. >3 severe VOC episodes/year, that were refractory to opioids for periods longer than 3 weeks duration<br><br>Exclusion: pregnancy, concomitant infection                                                                                                             | Adults<br><br>Overall median: 23.5 (range 18-32)                                                                                                                                                                                  | HbSS:11(79%)<br>HbSC:3 (11%)                                                                                      | 14 (100%) | Previous VOC/month: 3.3 (95% CI 2.0-5.0)<br><br>(excluding one PT with 19.3 VOC/month) | Avascular necrosis: 7 | MTX 10mg weekly IM (n=14)             | 12 weeks          | NR | Boldrini Children's Center and UNIEM <sup>3</sup> Institute. | JA |
| Keikhaei<br>2015<br>Iran<br>[30]     | Single-arm<br><br>Single centre<br>48 (24); 1<br><br>Cohort<br>2013 to 2014 | 1. admitted to Shafa Hospital, Ahvaz, Iran, from 2013 to 2014<br>2. aged 6-18                                                                                                                                                                                                                                     | Children and adolescents<br><br>Overall mean 13.7 (range 6 to 18)                                                                                                                                                                 | NR                                                                                                                | NR        | NR                                                                                     | NR                    | HU 10 mg/kg/day oral (n=48)           | 1 year            | NR | Ahvaz Jundishapur University of Medical Sciences             | JA |

|                                                                                                                   |                                                                                |                                                                                                                                                                                                                                                                                                                                                                                                                                                                                                           |                                                                                                                   |                                                              |                                                            |                                                                         |                                                                                                                                                                                                                 |                                                           |                                                                            |                              |                           |    |
|-------------------------------------------------------------------------------------------------------------------|--------------------------------------------------------------------------------|-----------------------------------------------------------------------------------------------------------------------------------------------------------------------------------------------------------------------------------------------------------------------------------------------------------------------------------------------------------------------------------------------------------------------------------------------------------------------------------------------------------|-------------------------------------------------------------------------------------------------------------------|--------------------------------------------------------------|------------------------------------------------------------|-------------------------------------------------------------------------|-----------------------------------------------------------------------------------------------------------------------------------------------------------------------------------------------------------------|-----------------------------------------------------------|----------------------------------------------------------------------------|------------------------------|---------------------------|----|
| LeBlanc 2016<br>USA<br><br>[31]<br><br>NCT02709681                                                                | Single-arm<br><br>Retrospective cohort study<br>16 (6); 1                      | More than 5 pain events per year                                                                                                                                                                                                                                                                                                                                                                                                                                                                          | Adults and adolescents<br><br>Mean: 15.5 (SD 2.8)                                                                 | HbSS: 14 (88%)<br>HbSβ <sup>0</sup> : 1 (6%)<br>HbSC: 1 (6%) | NR                                                         | NR                                                                      | ED visit/month:<br>Mean 0.31 (SD 0.27)<br>Hospitalization/month: 0.19<br><br>Chronic transfusions: 10                                                                                                           | Methadone oral (n=16)<br>Flexible dose                    | Mean: 2.1 years                                                            | NR                           | NR                        | CA |
| Heeney 2016<br>Americas, Europe, Asia and Africa<br><br>[32, 33]<br>May 2013 to Jun 2015<br>NCT01794000           | RCT, double-blind (phase 3)<br><br>Multicentre<br>341 (173); 2                 | 1. HbSS, HbSβ <sup>0</sup><br>2. At least 2 VOC in the year prior to screening<br>3. TCD within the last year for patients ≤16 years of age<br>4. Children aged 2 to <18 years<br>5. Body weight ≥12 kg<br><br>Exclusion: abnormal/conditional TCD, chronic transfusion, hepatic/renal dysfunction, history of transient ischemic attack or haemorrhage, severe head traumatic stroke, chronic treatment with NSAID, use of anticoagulants or other antiplatelet drugs                                    | Children and adolescents<br><br>Mean:10.6 (SD 4.3)<br><br>White: 58/169<br>Black: 109/169<br>Multiple: 2/169      | NR                                                           | 153 (45%) N of VOCs in previous year:<br>Mean 4.0 (SD 7.9) | NR                                                                      | 1. Placebo (n=170)<br>2. Prasugrel oral (n=171)<br>Individual dose-adjustment strategy:<br><br>Initial dose: 0.08 mg/kg; maintenance: 0.04-0.12 mg/kg (maximum 10mg) by a targeted level of platelet reactivity | 9 to 24 months                                            | No anticoagulants or antiplatelet drugs during the study<br>No NSAID drugs | Daiichi Sankyo and Eli Lilly | JA                        |    |
| Reid 2014<br>United States, Lebanon, Egypt, Jamaica and Canada<br><br>[34]<br>Aug 2012 to May 2013<br>NCT01601340 | RCT, double-blind (phase 2, terminated early)<br><br>Multicentre<br>76 (49); 2 | 1. HbSS or HbSβ <sup>0</sup><br>2. Aged 12-60 years<br>3. at least one acute SCD-related complication or leg ulcers in 12 months prior to enrolment<br>4. no current (i.e., within 3 months prior to enrolment) HU treatment<br><br>Exclusion: regular transfusion, an acute vaso-occlusive event within 3 weeks, pulmonary hypertension requiring oxygen therapy, symptomatic untreated peptic ulcer or gastroesophageal reflux disease, history of pancreatitis, abnormal ALT/AST levels, HIV infection | Adults and children<br><br>Mean: 27.8 (range 12-55)<br><br>Black or African-American: 24 (63%)<br>White :14 (37%) | HbSS: 60 (79%)<br>HbSβ <sup>0</sup> : 16 (21%)               | N/A                                                        | N of pain crises in the 12 months before enrolment<br>0-1: 13<br>>2: 25 | NR                                                                                                                                                                                                              | 1. HQK-1001 15 mg/kg BID oral (n=38)<br>2. placebo (n=38) | 48 weeks                                                                   | Folic acid daily             | HemaQuest Pharmaceuticals | JA |

|                                                                                                  |                                                              |                                                                                                                                                                                                                                                                                                                                                                                                                                                                                                                                                                                                                           |                                                      |                                                                                              |    |                                                                    |                                                                                                                          |                                                                                                                                                                                                                                                                             |          |                                                                                |                                                                       |    |
|--------------------------------------------------------------------------------------------------|--------------------------------------------------------------|---------------------------------------------------------------------------------------------------------------------------------------------------------------------------------------------------------------------------------------------------------------------------------------------------------------------------------------------------------------------------------------------------------------------------------------------------------------------------------------------------------------------------------------------------------------------------------------------------------------------------|------------------------------------------------------|----------------------------------------------------------------------------------------------|----|--------------------------------------------------------------------|--------------------------------------------------------------------------------------------------------------------------|-----------------------------------------------------------------------------------------------------------------------------------------------------------------------------------------------------------------------------------------------------------------------------|----------|--------------------------------------------------------------------------------|-----------------------------------------------------------------------|----|
| Adegoke 2013<br>Nigeria<br><br>[35]<br>Jul to Dec 2011                                           | RCT, open<br><br>Multicentre<br>113 (56); 2                  | Steady state (no painful episode, anemic crisis, or infection on the day of recruitment)<br><br>Exclusion: alternative medicine (Aloe vera gel, Moringa oleifera, Solamine syrup, and Ciklavit (Cajanus cajan) suspension), hydroxyurea, Discrivite suspension, Niprisan                                                                                                                                                                                                                                                                                                                                                  | Children and adolescents<br><br>Mean: 4.55 (SD 3.57) | NR                                                                                           | NR | N of previous significant painful episodes<br>Mean: 3.27 (SD 3.93) | N of previous Transfusion<br>Mean: 1.29 (SD 0.77)<br><br>N of Previous hospitalization<br>Mean: 2.12 (SD 2.67)           | 1. Lime juice + Routine oral drugs (folic acid, vitamin B complex and proguanil) BID oral (n=58)<br>2. Control (Routine oral drugs (folic acid, vitamin B complex and proguanil)) BID (n=55)<br><br>Adjusted by body weight:<br>≤10kg: 5 ml; 11-20 kg: 10 ml; ≥20 kg: 15 mg | 6 months | NR                                                                             | NR                                                                    | JA |
| Arruda 2013<br>Brazil<br><br>[36]<br>Sep to Dec 2010                                             | RCT, double-blind<br><br>Single centre<br>83 (53); 2         | 1. HbSS or HbSβ <sup>o</sup><br><br>Exclusion: hospitalized patients, pregnancy, untreated iron overload, other investigational drugs in the last 12 months or contraindications to Vitamin C/E                                                                                                                                                                                                                                                                                                                                                                                                                           | Adults<br><br>Overall median: 27 (range 18-68)       | HbSS: 73 (88%)                                                                               | NR | NR                                                                 | Chronic use of NSAIDs: 52<br>Chronic use of opioids: 16<br>Transfused patients (past 12 months): 18                      | 1. Placebo (n=39)<br>2. Vitamins C 1400 mg/day and E 800 mg/day oral (n=44)                                                                                                                                                                                                 | 6 months | NR                                                                             | FAPESP and CNPq                                                       | JA |
| Wun 2013<br>United States and Canada<br><br>[37-39]<br>26 Aug 2010 to 13 Jun 2011<br>NCT01167023 | RCT, double-blind (phase 2)<br><br>Multicentre<br>62 (30); 2 | 1. HbSS, HbSC, HbSβ <sup>o</sup> , HbSβ <sup>+</sup><br>2. aged 18 to 55 years<br>3. did not have a diagnosis of acute VOC within 30 days of the study screening visit<br>4. NSAIDs for treatment of pain were not permitted in the 5 days prior to randomization or for ≥5 consecutive days during the study period.<br>5. HU was permitted in patients already on a stable dose 30 days prior to randomization<br><br>Exclusion: hepatic/renal dysfunction, HCT < 18%, risk of excessive bleeding, history of bleeding disorders, haemorrhagic or ischemic stroke, retinal haemorrhage, TIA or intracranial haemorrhage | Adults<br><br>Mean:31.5                              | HbSS: 37 (61%)<br>HbSC: 15 (25%)<br>HbSβ <sup>o</sup> : 3 (5%)<br>HbSβ <sup>+</sup> : 6 (8%) | NR | Vaso-occlusive crisis: 61%<br>Pain intensity: Mean: 1.8 vs 2.4     | Acute chest syndrome: 22.0% (prasugrel) vs 9.5% (placebo)<br>Pulmonary hypertension: 17.1% (prasugrel) vs 9.5% (placebo) | 1. Prasugrel 5 mg/day oral (n=41)<br>2. placebo (n=19*)                                                                                                                                                                                                                     | 30 days  | NR                                                                             | Daiichi Sankyo Co., Ltd. and Eli Lilly and Company.                   | JA |
| Daak 2013<br>Sudan<br><br>[40]<br>Apr 2009 to May 2010                                           | RCT, double-blind<br><br>Single centre<br>140 (61); 2        | Steady state, defined as no evidence of fever, infection, or crisis for >4 week before the start of the study<br><br>Exclusion: other chronic diseases, transfusion within 4 months,                                                                                                                                                                                                                                                                                                                                                                                                                                      | Children and adolescents<br><br>Mean (SD): 7.8(5.5)  | All HbSS                                                                                     | NR | NR                                                                 | Crisis-induced hospitalization (N/year)<br><br>No. admission: 9.8%                                                       | 1. Placebo (n=61*)<br>2. Omega-3 (n=67*)                                                                                                                                                                                                                                    | 1 year   | All of the patients were receiving regular folate supplementation, and those 5 | Marie Curie Transfer of Knowledge Programme, Efamol, and the Kitchner | JA |

|                                                                                                                                                                        |                                                                                            |                                                                                                                                                                                                                                                                                                                                                                                                                                                                                                                                                                                                                 |                                                                                                                                                |                                                                                                               |           |                                                                       |                                              |                                                                                                                                                                                                                   |          |                                                                                                                                                        |                                                         |    |
|------------------------------------------------------------------------------------------------------------------------------------------------------------------------|--------------------------------------------------------------------------------------------|-----------------------------------------------------------------------------------------------------------------------------------------------------------------------------------------------------------------------------------------------------------------------------------------------------------------------------------------------------------------------------------------------------------------------------------------------------------------------------------------------------------------------------------------------------------------------------------------------------------------|------------------------------------------------------------------------------------------------------------------------------------------------|---------------------------------------------------------------------------------------------------------------|-----------|-----------------------------------------------------------------------|----------------------------------------------|-------------------------------------------------------------------------------------------------------------------------------------------------------------------------------------------------------------------|----------|--------------------------------------------------------------------------------------------------------------------------------------------------------|---------------------------------------------------------|----|
| ISRCTN80844<br>630                                                                                                                                                     |                                                                                            | hydroxyurea treatment, history of<br>overt stroke, pregnancy                                                                                                                                                                                                                                                                                                                                                                                                                                                                                                                                                    |                                                                                                                                                |                                                                                                               |           | 1-2: 43.7%<br>3-5: 24.1%<br>> 5: 22.4%                                |                                              |                                                                                                                                                                                                                   |          | y of age were<br>receiving<br>standard oral<br>prophylactic<br>penicillin.                                                                             | Memorial Trust<br>Fund and<br>University of<br>Khartoum |    |
| Ataga 2011<br>United<br><br>States,<br>Jamaica,<br>Brazil, France,<br>Trinidad and<br>the United<br><br>Kingdom.<br><br>[41]<br>Feb 2005 to<br>Apr 2007<br>NCT00102791 | RCT, double-<br>blind (phase 3,<br>terminated<br>early)<br><br>Multicentre<br>297 (160); 2 | 1. HbSS, HbSC, HbSβ <sup>0</sup> , HbSβ <sup>+</sup><br>2. aged 16-65 years<br>3. at least two acute sickle-related<br>painful crises in the previous 12<br>months<br>4. Patients were permitted to receive<br>concomitant therapy with HU if they<br>had received HU for the preceding 12<br>months and their dose was stabilized<br>for at least 3 months prior to the<br>study<br><br>Exclusion: unstable cardiovascular,<br>neurological, endocrine, hepatic, or<br>renal disorders, Hb < 40 or > 110 g/L,<br>chronic transfusion, cancer diagnosis<br>within 5 years, or hepatitis B/C or HIV<br>infection | Adults and<br>adolescents<br><br>Mean: 28.5(SD<br>9.9)<br><br>Black: 134 (92%)<br>Multiracial: 6 (4%)<br>Caucasian: 3<br>(2%)<br>Other: 2 (2%) | HbSS: 245 (85%)<br>HbSC: 16 (6%)<br>HbSβ <sup>0</sup> : 21(7%)<br>HbSβ <sup>+</sup> : 4 (1%)<br>Other: 3 (1%) | 163 (56%) | SCD crises<br>history in past 12<br>months (%)<br>2-4: 59%<br>>5: 41% | NR                                           | 1. Senicapoc 20mg/d BID<br>(loading) and then<br>10mg/dOD oral (n=145*)<br>2. placebo (n=144*)                                                                                                                    | 52 weeks | NR                                                                                                                                                     | Icagen<br>(Research<br>Triangle Park)                   | JA |
| Diop 2011<br>Senegal<br><br>[42, 43]<br>Sep 2007 to<br>Feb 2008                                                                                                        | RCT, open<br><br>Single centre<br>60 (31); 2                                               | 1. Follow-up at least 2 years before in<br>the clinic with records of standardized<br>clinical and laboratory<br><br>Exclusion: allergic to sulfonamide                                                                                                                                                                                                                                                                                                                                                                                                                                                         | Adults and<br>adolescents<br><br>Mean: 23.2 (SD<br>6.9)                                                                                        | All SCA                                                                                                       | NR        | N of VOC/year:<br>Mean 0.8 (SD<br>1.25)                               | N of SCD with<br>chronic<br>complications: 8 | 1. Sulfadoxine-<br>pyrimethamine (S: 25<br>mg/kg/P: 1.25 mg/kg) OD<br>oral (n=30)<br>2. Placebo (n=30)<br><br>The treatment was given<br>once during the following<br>months: September,<br>October, and November | 3 months | 1. Folic acid,<br>paracetamol<br>during pains<br>2. Artemisinin-<br>based<br>combination<br>therapy or<br>injectable<br>quinine for<br>malaria attacks | NR                                                      | JA |

|                                                                         |                                                                  |                                                                                                                                                                                                                                                                                                                                                                                                                                                                                                                                                                                                                                                                 |                                                                                |                                                                |          |                                                                                                                                            |                                                                                                                                                                                                                                                             |                                                                                                                                                                                                                     |                                                                        |    |                                              |    |
|-------------------------------------------------------------------------|------------------------------------------------------------------|-----------------------------------------------------------------------------------------------------------------------------------------------------------------------------------------------------------------------------------------------------------------------------------------------------------------------------------------------------------------------------------------------------------------------------------------------------------------------------------------------------------------------------------------------------------------------------------------------------------------------------------------------------------------|--------------------------------------------------------------------------------|----------------------------------------------------------------|----------|--------------------------------------------------------------------------------------------------------------------------------------------|-------------------------------------------------------------------------------------------------------------------------------------------------------------------------------------------------------------------------------------------------------------|---------------------------------------------------------------------------------------------------------------------------------------------------------------------------------------------------------------------|------------------------------------------------------------------------|----|----------------------------------------------|----|
| Alvim 2005<br>Saudi Arabia<br><br>[44, 45]<br>Sep 1998 to<br>Dec 1999   | RCT,<br>crossover,<br>double-blind<br><br>73 (40); 2             | Exclusion: renal, hepatic, cardiac or<br>coagulation disorders secondary or<br>not to SCD, regular transfusion,<br>hydroxyurea use, age > 20 or < 5<br>years, cognitive dysfunction                                                                                                                                                                                                                                                                                                                                                                                                                                                                             | Adults and<br>children<br><br>Median: 12.1<br>(range 5 to 20)                  | HbSS: 42 (58%)<br>HbSC: 26 (36%)<br>HbSβ <sup>0</sup> : 5 (7%) | NR       | NR                                                                                                                                         | History of<br>transfusion:<br>once: 13; 2-5<br>times: 19; More<br>than 5: 18<br><br>Splenectomy: 5<br>Cholecystectomy:<br>5<br>Osteomyelitis: 11<br>Acute splenic<br>sequestration: 12<br>Aplastic crisis: 1<br>Avascular<br>necrosis of<br>femoral head: 4 | 1. Piracetam 4.8 g/m <sup>2</sup> /day<br>QID (n=73*)<br>2. Placebo (n=73*)                                                                                                                                         | 6 months,<br>then<br>crossover<br>with 2<br>weeks<br>washout<br>period | NR | FAPEMIG, CNPq JA                             |    |
| Bao 2008<br>US<br><br>[46]                                              | RCT, double-<br>blind<br><br>Single centre<br>36 (14); 2         | Exclusion: non-ambulatory, receiving<br>more than 6 transfusions per year or<br>taking hydroxyurea, history of<br>substance abuse, neurological or<br>psychiatric deficits that could affect<br>compliance, use of<br>immunosuppressive<br>drugs, HIV and hepatitis B                                                                                                                                                                                                                                                                                                                                                                                           | Adults<br><br>Overall mean:<br>32.9 (SD 9.7)<br>(range 18-47)<br><br>All black | HbSS: 32 (89%)<br>HbSC: 3 (8%)<br>HbSβ <sup>0</sup> : 1 (3%)   | None     | N of sickle pain<br>episode 3-month<br>prior to the study:<br>5 (placebo); 3<br>(zinc)                                                     | NR                                                                                                                                                                                                                                                          | 1. Placebo (n=18)<br>2. Zinc 25mg TID (n=18)                                                                                                                                                                        | 3 months                                                               | NR | NR                                           | JA |
| Ataga 2008<br>US<br><br>[47]<br>Feb 2002 and<br>Jan 2004<br>NCT00040677 | RCT, double-<br>blind (phase 2)<br><br>Multicentre<br>90 (45); 3 | 1. HbSS<br>2. Aged 18-60 years<br>3. at least one prior acute sickle-<br>related painful episode (commonly<br>referred to as painful crisis) that had<br>required hospitalization, but none in<br>the 4 weeks prior to screening<br><br>Exclusion: Hb< 40 g/L or > 100 g/L,<br>received a transfusion within 30 days<br>or underwent an exchange<br>transfusion within 60 days, hepatitis<br>B, HIV, cancer diagnosis within 5<br>years, mediations (eg, amiodarone,<br>chlorperazine, disopyramide,<br>dofetilide,<br>haloperidol, procainamide, quinidine,<br>risperidone, sotalol, thioridazine,<br>trifluoperazine, warfarin sodium, and<br>erythropoietin) | Adults<br><br>Mean: 33.6(range<br>19-55)                                       | All HbSS                                                       | 24 (27%) | Hospitalizations<br>due to painful<br>episodes in<br>previous 12<br>months:<br>None: 12 (39%)<br>1: 6 (19%)<br>2-3: 6 (19%)<br>≥3: 7 (23%) | NR                                                                                                                                                                                                                                                          | 1. Placebo (n=30)<br>2. Senicapoc (low-dose):<br>100 mg (loading dose); 6<br>mg/d (maintenance) oral<br>OD (n=29)<br>3. Senicapoc (high-dose):<br>150 mg (loading dose); 10<br>mg/d (maintenance) oral<br>OD (n=31) | 12 weeks                                                               | NR | lcagen<br>(Research<br>Triangle Park,<br>NC) | JA |

|                            |                                                 |                                                                                                                                                                                 |                                                                                       |                     |      |                                                    |                                                                  |                                                                                                                                                                                                                                                 |                                                      |    |                                                                             |    |
|----------------------------|-------------------------------------------------|---------------------------------------------------------------------------------------------------------------------------------------------------------------------------------|---------------------------------------------------------------------------------------|---------------------|------|----------------------------------------------------|------------------------------------------------------------------|-------------------------------------------------------------------------------------------------------------------------------------------------------------------------------------------------------------------------------------------------|------------------------------------------------------|----|-----------------------------------------------------------------------------|----|
| Eke 2003<br>Nigeria        | RCT, open<br>(phase 2)                          | 1. HbSS<br>2. Aged 1-16 years<br>3. Stable condition                                                                                                                            | Children and<br>Adolescents                                                           | HbSS: 101<br>(100%) | NR   | NR                                                 | Total N of malarial<br>parasites: 20<br>(equally<br>distributed) | 1. Pyrimethamine 0.5<br>mg/kg once weekly oral<br>(n=36*)<br>2. Proguanil 1.5 mg/kg OD<br>oral (n=32*)<br>3. Placebo (Vitamin c 7<br>mg/kg) OD oral (n=29*)                                                                                     | 9 months                                             | NR | Combating<br>Childhood<br>Communicable<br>Diseases<br>(Atlanta,<br>Georgia) | JA |
| [48]                       | Single centre<br>101 (48); 3                    | Exclusion: loss to 2 consecutive<br>follow-up, pregnancy                                                                                                                        | Mean: 8.1 (SD<br>4.3) (Range 2-16)                                                    |                     |      |                                                    |                                                                  |                                                                                                                                                                                                                                                 |                                                      |    |                                                                             |    |
| Pace 2003<br>US            | RCT, double-<br>blind                           | 1. HbSS or HbSβ <sup>0</sup><br>2. Aged above 15 years<br>3. With dense cells greater than 6%<br>and 2 or more VOC episodes per<br>year for the 2 years prior to<br>enrollment. | Adults and<br>Adolescents                                                             | NR                  | NR   | N of VOC<br>episodes Mean: 5<br>(SD 2)             | NR                                                               | 1. Placebo (n=5)<br>2. NAC (low-dose) 600<br>mg/day (n=5)<br>3. NAC (mid-dose)<br>1200mg/day (n=5)<br>4. NAC (high-dose)<br>2400mg/day (n=6)                                                                                                    | 7 months                                             | NR | Zambon Corp.                                                                | JA |
| [49]                       | Single centre<br>21 (10); 4                     | Exclusion: pregnancy, narcotic<br>addition, chronic transfusions, history<br>of stroke, HIV, investigational drug                                                               | Mean:17.9<br>(SD1.2)                                                                  |                     |      |                                                    |                                                                  | All doses were divided by 3<br>to be taken                                                                                                                                                                                                      |                                                      |    |                                                                             |    |
| Wambebe<br>2001<br>Nigeria | RCT, cross-<br>over, double-<br>blind (Phase 2) | 1. HbSS<br>2. Aged 2-45 years<br>3. at least 3 painful or vaso-occlusive<br>crises in the previous year                                                                         | Adults and<br>children                                                                | All HbSS            | NR   | Mild to Moderate<br>Pains (Mean):<br>18.38         | NR                                                               | 1. Niprisan 12 mg/kg OD<br>(n= 70*)<br>2. Placebo (n=70*)                                                                                                                                                                                       | 6 months,<br>then<br>crossover<br>without<br>washout | NR | NR                                                                          | JA |
| [50, 65]                   | 82 (46); 2                                      | Exclusion: HIV, hepatitis, pregnancy                                                                                                                                            | Overall (years)<br>< 9: 1 (1%)<br>10-19: 67 (82%)<br>20-29: 11 (13%)<br>30-39: 3 (4%) |                     |      | Severe Pains:<br>12.67                             |                                                                  |                                                                                                                                                                                                                                                 |                                                      |    |                                                                             |    |
| Tomer 2001<br>US           | RCT, double-<br>blind                           | 1. Frequent pain episodes (≥3<br>events/year)<br>2. Not on HU                                                                                                                   | Adults                                                                                | NR                  | None | Frequency of pain<br>episodes in 12<br>months: 7.8 | NR                                                               | 1. Mehaden fish oil: 0.25<br>g/kg/day OD oral daily<br>(n=5*)<br>2. Placebo (n=5*)                                                                                                                                                              | 12 months                                            | NR | NR                                                                          | JA |
| [51, 52]                   | Single centre<br>13 (NR); 2                     |                                                                                                                                                                                 | NR                                                                                    |                     |      |                                                    |                                                                  |                                                                                                                                                                                                                                                 |                                                      |    |                                                                             |    |
| de Abood 1997<br>Spain     | RCT, double-<br>blind                           | 1. HbSS<br>2. history of at least one painfulcrisis<br>per month were included                                                                                                  | Adults                                                                                | All HbSS            | NR   | NR                                                 | NR                                                               | 1. DMPA 150mg per<br>month for first three<br>months, then usual dose of<br>150mg every 3 months oral<br>(n=13)<br>2. levonorgestrel/ethinyl<br>estradiol (0.15/0.03 mg)<br>OD oral (n=14)<br>3. Surgically sterilized<br>(n=16) [not eligible] | 12 months                                            | NR | Special<br>Programme of<br>Human<br>Reproduction of<br>WHO                  | JA |
| [53]                       | Single centre<br>43 (43); 3                     |                                                                                                                                                                                 | Overall range: 17-<br>39                                                              |                     |      |                                                    |                                                                  |                                                                                                                                                                                                                                                 |                                                      |    |                                                                             |    |

|                         |                            |                                                                                                                                                                                                                                                                                                                       |                           |                                               |    |                                                                                                                                                                   |    |                                                                                                                         |                                          |                                                                                                                        |    |
|-------------------------|----------------------------|-----------------------------------------------------------------------------------------------------------------------------------------------------------------------------------------------------------------------------------------------------------------------------------------------------------------------|---------------------------|-----------------------------------------------|----|-------------------------------------------------------------------------------------------------------------------------------------------------------------------|----|-------------------------------------------------------------------------------------------------------------------------|------------------------------------------|------------------------------------------------------------------------------------------------------------------------|----|
| Gupta 1995<br>India     | RCT, double-blind          | 1. > 5 years<br>2. HbSS                                                                                                                                                                                                                                                                                               | Adults and children       | All HbSS                                      | NR | NR                                                                                                                                                                | NR | 1. Zinc: 220 mg TID oral (n=65*)<br>2. Placebo (n=65*)                                                                  | 1.5 years                                | NR                                                                                                                     | NR |
| [54]                    | Phase 2<br>145 (34); 0     | Exclusion: chronic persistent infection or exposed to extremes of temperature variation frequently, on drug therapy for some other disease, evidence of organ failure                                                                                                                                                 | Mean: 16.4 (range12-27)   |                                               |    |                                                                                                                                                                   |    |                                                                                                                         |                                          |                                                                                                                        |    |
| Manrique 1987<br>Brazil | RCT                        | HbSS                                                                                                                                                                                                                                                                                                                  | Adults and children       | All HbSS                                      | NR | Overall pain events (n)<br>None: 11<br>< 5 times: 7<br>< 10 times: 15<br>> 10 times: 11<br>Persistent: 14<br>Not clear: 2                                         |    | 1. Placebo (n=29*)<br>2. Pentoxifylline : (Adults: 1200mg; children: 400-600 mg, depending on body weight) oral (n=28*) | 6 weeks                                  | NR                                                                                                                     | NR |
| [55]                    | Phase 2<br>60 (23); 2      | Exclusion: acute infections                                                                                                                                                                                                                                                                                           | Range: 7-34               |                                               |    | Overall pain duration (days)<br>None: 11<br>< 5 days: 12<br>< 10 days: 17<br>> 10 days: 4<br>Persistent: 14<br>Not clear: 2<br>All in 6 months observation period |    |                                                                                                                         |                                          |                                                                                                                        |    |
| Zago 1984<br>Brazil     | RCT, crossover             | NR                                                                                                                                                                                                                                                                                                                    | Adults and children       | HbSS: 25 (86%)<br>HbSβ <sup>0</sup> : 4 (14%) | NR | NR                                                                                                                                                                | NR | 1. Aspirin 17-45 mg/kg OD (n=29*)<br>2. Placebo (n=29*)                                                                 | 5 months, then crossover without washout | NR                                                                                                                     | NR |
| [56]                    | 42 (NR); 2                 |                                                                                                                                                                                                                                                                                                                       | Median: 12 (range 4 - 31) |                                               |    |                                                                                                                                                                   |    |                                                                                                                         |                                          |                                                                                                                        |    |
| Cabannes 1984<br>Africa | RCT, double-blind          | No antisickling treatment for two months before admission to the study                                                                                                                                                                                                                                                | Adults and adolescents    | All HbSS                                      | NR | N of crises in 6 months before study: 223                                                                                                                         | NR | 1. Ticlopidine 250mg BID if body weight <45kg; 250mg TID if body weight >45kg oral (n=70)<br>2. Placebo (n=70)          | 6 months                                 | Acute crises treatment varied depends on regions but including transfusions, analgesic, antibiotics and anticoagulants | NR |
| [57]                    | Multicentre<br>140 (NR); 2 | Exclusion: other than HbSS; uncontrolled parasitic disease; malnutrition; a history of drug abuse; glaucoma, prostatitis hypertrophy, urinary retention, hypersensitivity to ticlopidine or anticholinergic drugs, acute cerebro-vascular accidents, severe intercurrent infection, pulmonary oedema or renal failure | Overall range 15-45       |                                               |    |                                                                                                                                                                   |    |                                                                                                                         |                                          |                                                                                                                        |    |

JA

JA

JA

JA

|                              |                                                                           |                                                                                                                           |                                                               |                                                 |    |                                                             |    |                                                                                                                                                                             |                                                           |                                                                                                          |                                                               |                  |
|------------------------------|---------------------------------------------------------------------------|---------------------------------------------------------------------------------------------------------------------------|---------------------------------------------------------------|-------------------------------------------------|----|-------------------------------------------------------------|----|-----------------------------------------------------------------------------------------------------------------------------------------------------------------------------|-----------------------------------------------------------|----------------------------------------------------------------------------------------------------------|---------------------------------------------------------------|------------------|
| Gail 1982<br>Ghana           | RCT, double-blind                                                         | HbSS                                                                                                                      | Adults and children                                           | All HbSS                                        | NR | Number of crises in the previous year<br>0-2: 18<br>> 2: 21 | NR | 1. Control (n=39)<br>2. Urea: 0.266 g/kg Low-dose: twice a week; High-dose: daily (n=40)                                                                                    | Average: 13.7 months                                      | 1. Folic acid (1 mg) and multivitamins daily<br><br>2.Chloroquine was given with urea or sucrose placebo | International Sickle Cell Anemia Research Institute and CSRPM | JA               |
| [58]<br>Sep 1976 to Sep 1978 | Phase 2<br>79 (39); 2                                                     | Exclusion: other major illnesses                                                                                          | Overall:<br>< 5 years: 21<br>5-14 years: 28<br>> 14 years: 30 |                                                 |    |                                                             |    |                                                                                                                                                                             |                                                           |                                                                                                          |                                                               |                  |
| Deceulaer 1982<br>Jamaica    | RCT, crossover, double-blind                                              | HbSS                                                                                                                      | Adults                                                        | All HbSS                                        | NR | NR                                                          | NR | 1. placebo (n=10*)<br>2. medroxyprogesterone acetate 150mg every 3-month IM (n=13*)                                                                                         | 2 years (9 months, then crossover after 6 months washout) | NR                                                                                                       | NR                                                            | JA               |
| [59]                         | Single centre<br>25 (25); 2                                               |                                                                                                                           | Overall age range: 20-41                                      |                                                 |    |                                                             |    |                                                                                                                                                                             |                                                           |                                                                                                          |                                                               |                  |
| Mann 1974<br>UK              | RCT, crossover                                                            | 1. HbSS, HbSC, HbSβ<br>2. 5-17 years<br>3. Previously suffered painful crises                                             | Children and adolescents                                      | HbSS: 15 (83%)<br>HbSC: 2 (11%)<br>HbSβ: 1 (6%) | NR | NR                                                          | NR | 1. Folic acid 5 mg daily oral (n=25)<br>2. Folic acid 5mg + Sodium bicarbonate 0.06-0.2 gm/kg/day initially, then 0.1-0.4 mg/kg/day oral (n=25)                             | 2 years (1 year than crossover without washout)           | NR                                                                                                       | United Birmingham Hospitals and Endowment Research Fund       | JA               |
| [60]                         | Single centre<br>18 (12); 2                                               |                                                                                                                           | Overall mean 8.4 (SD 3.2)                                     |                                                 |    |                                                             |    |                                                                                                                                                                             |                                                           |                                                                                                          |                                                               |                  |
| Isaacs 1972<br>Nigeria       | RCT, crossover<br><br>(preliminary report before crossover)<br>44 (28); 2 | 1. HbSS<br>2. Moderately severe pain at least once in three months (with little or no fever or exacerbations of jaundice) | Adults and children                                           | All HbSS                                        | NR | NR                                                          | NR | 1. Saline IM (n=44*)<br>2. Steroid (Testosterone/Progesterone)<br>) Male: testosterone 10 mg;<br>Female: progesterone 10 mg every week IM (n=44*)                           | 4-6 months                                                | All patients were on regular folates and had high or normal serum-iron values                            | Glaxo Allenburys of Nigeria                                   | Journ al article |
| [61]                         |                                                                           |                                                                                                                           | Overall range 2-35                                            |                                                 |    |                                                             |    |                                                                                                                                                                             |                                                           |                                                                                                          |                                                               |                  |
| Oski 1968<br>USA             | RCT, crossover, double-blind                                              | At least 2 painful episodes during the 2 year period prior to study                                                       | Adults and children                                           | HbSS: 10 (71%)<br>HbSC: 4 (29%)                 | NR | NR                                                          | NR | 1. Promazine hydrochloride oral (n=14*) Based on weight: 2 tablets a day: 40-80 pounds; 3 tablets a day: 80-120 pounds; 4 tablets a day: > 120 pounds<br>2. Placebo (n=14*) | 3 months                                                  | NR                                                                                                       | NR                                                            | JA               |
| [62]                         | 14 (5); 2                                                                 |                                                                                                                           | NR                                                            |                                                 |    |                                                             |    |                                                                                                                                                                             |                                                           |                                                                                                          |                                                               |                  |

|                                                                                                          |                                                                        |                                                                                                                                                                                                                     |                                                                                                  |                                   |               |                    |                                                                                                       |                                                                                                                                                                              |             |    |                       |    |
|----------------------------------------------------------------------------------------------------------|------------------------------------------------------------------------|---------------------------------------------------------------------------------------------------------------------------------------------------------------------------------------------------------------------|--------------------------------------------------------------------------------------------------|-----------------------------------|---------------|--------------------|-------------------------------------------------------------------------------------------------------|------------------------------------------------------------------------------------------------------------------------------------------------------------------------------|-------------|----|-----------------------|----|
| NCT02482298<br>USA, Egypt, France, Italy, Kenya, Lebanon, UK, Turkey<br><br>[63]<br>Jul 2015 to Nov 2016 | RCT, double-blind<br><br>Multicentre<br>87 (47); 3                     | 1. HbSS, HbSβ <sup>0</sup><br>2. Aged 18-30<br>3. If treated with hydroxyurea, the dose must have been stable for 3 months                                                                                          | Adults<br><br>Mean: 21.6 (SD 3.42)<br><br>Black Or African American: 17 (57%)<br>White: 13 (43%) | NR                                | NR            | NR                 | NR                                                                                                    | 1. Placebo (n =30)<br>2. Ticagrelor 10MG BID oral (n=27)<br>3. Ticagrelor 45mg BID oral (n=30)                                                                               | 12 weeks    | NR | AstraZeneca           | CT |
| NCT01476696<br>USA<br><br>[64]<br>Feb 2014 to Oct 2016<br>NCT01476696                                    | Single-arm<br><br>Phase 2 (Part B)<br>18 (NR); 1                       | 1. HbSS, HbSβ<br>2. ≥2 to <18 years of age and ≥ 12 kg body weight<br>3. Participants on hydroxyurea must be on a stable dose for the 60 days prior to enrolment without signs of hematologic toxicity at screening | Children and adolescents<br><br>NR (only reported overall, part A+B)                             | NR                                | NR            | NR                 | NR                                                                                                    | Prasugrel 0.06-0.12 mg/kg depending on their steady-state PD response oral (n=18)                                                                                            | 14 ± 4 days | NR | Eli Lilly and Company | CT |
| Vichinsky 2010 [66]                                                                                      | RCT<br><br>36 (NR)                                                     | 1. HbSS<br>2. Normal neurological exam, WAIS III PIQ score ≤ 90, hemoglobin ≤ 9 g/dL<br>3. Aged 21-55                                                                                                               | Adults<br><br>Mean: 29                                                                           | All HbSS                          | HU: 14 (39%)  | NR                 | Transfusion group had average of 5.6 transfusions (which differ from standard care group)<br>ACS: 35% | 1. Chronic transfusion (n = 20) maintaining a hemoglobin of 2 g/dL rise over baseline with matched red cells for D, C/c, E/e, and Kell antigens<br>2. Standard care (n = 16) | 4 weeks     | NR | NR                    | CT |
| Styles USA<br><br>[67]                                                                                   | Single-arm<br><br>Open-label ½ study<br><br>Three centers<br>15 (0); 1 | NR                                                                                                                                                                                                                  | Adults<br><br>Mean: 32 (range 18-50)<br><br>All African-American                                 | HbSS: 13<br>HbSβ <sup>0</sup> : 2 | HU: 4 (26.7%) | VOC: 6 (past year) | ACS: 2 (past year)<br>Transfusion: 2 (past year)<br>Priapism: 1 (past year)                           | GMI-1070 20mg/kg (first dose) and 10 mg/kg after 10 hours                                                                                                                    | 28 days     | NR | NR                    | CT |

†If not stated, only one arm data were shown as representative  
\*final number used for analysis or crossover design  
ACS: Acute chest syndrome; ALT: Alanine transaminase; CA: Conference abstract; Cr: creatinine; CSRP: Center for Scientific Research into Plant Medicine; CT: Clinical trial registry; DDC: Doris Duke Charitable Foundation; ED: emergency department; HbSS: Homozygous sickle haemoglobin (HbS); HbSC: sickle haemoglobin S and haemoglobin C; HbSβ: sickle beta thalassemia, type '0' or '+'; HU: hydroxyurea; JA: Journal article; MTX: Methotrexate; NAD: N-acetylcysteine; NCATS: National Center for Advancing Translational Sciences; NCR: National Center for Research Resources; NHLBI: National Heart Lung and Blood Institute; NSAID: Nonsteroidal anti-inflammatory drugs; NR: Not reported; OOPD: FDA's Office of Orphan Products Development; PT: patient; SCD: sickle cell disease; TCD: transcranial Doppler; ZonMw: The Netherlands Organisation for Health Research and Development

## Reference

- Schlaeger JMM, Robert E.; Yao, Yingwei; Suarez, Marie L.; Golembiewski, Julie; Wilkie, Diana J.; Votta-Velis, Gina: **Management of Sickle Cell Pain Using Pregabalin: A Pilot Study.** *Pain Management Nursing* 2017, **18**(6):391-400.
- Hoppe CJ, Eufemia; Styles, Lori; Kuypers, Frans; Larkin, Sandra; Vichinsky, Elliott: **Simvastatin reduces vaso-occlusive pain in sickle cell anaemia: a pilot efficacy trial.** *British Journal of Haematology* 2017, **177**(4):620-629.
- Glassberg JM, Caterina; Cromwell, Caroline; Cytryn, Lawrence; Kraus, Thomas; Skloot, Gwen S.; Connor, Jason T.; Rahman, Adeeb H.; Meurer, William J.: **Inhaled steroids reduce pain and sVCAM levels in individuals with sickle cell disease: A triple-blind, randomized trial.** *American Journal of Hematology* 2017, **92**(7):622-631.
- Ataga KIK, Abdullah; Kanter, Julie; Liles, Darla; Cancado, Rodolfo; Friedrisch, Joao; Guthrie, Troy H.; Knight-Madden, Jennifer; Alvarez, Ofelia A.; Gordeuk, Victor R.; Gualandro, Sandra; Colella, Marina P.; Smith, Wally R.; Rollins, Scott A.; Stocker, Jonathan W.; Rother, Russell P.: **Crizanlizumab for the Prevention of Pain Crises in Sickle Cell Disease.** *New England Journal of Medicine* 2017, **376**(5):429-439.
- Ataga KIK, A.; Kanter, J.; Liles, D.; Cancado, R.; Friedrisch, J.; Guthrie, T. H.; Knight-Madden, J.; Alvarez, O. A.; Gordeuk, V. R.; Gualandro, S.; Collela, M. P.; Smith, W. R.; Rollins, S. A.; Stocker, J. W.; Rother, R. P.: **SUSTAIN: A multicenter, randomized, placebo-controlled, double-blind, 12-month study to assess safety and efficacy of selg1 with or without hydroxyurea therapy in sickle cell disease patients with sickle cell-related pain crises.** *Blood Conference: 58th Annual Meeting of the American Society of Hematology, ASH* 2016, **128**(22).
- Kutlar AK, J.; Liles, D.; Cancado, R.; Bruederle, A.; Shi, M.; Zhu, Z.; Ataga, Ki: **Crizanlizumab, A P-selectin inhibitor, increases the likelihood of not experiencing a sickle cell-related pain crisis while on treatment: results from the phase II sustain study.** *Haematologica Conference: 22th congress of the european hematology association Spain* 2017, **102**:166.
- Kanter JK, A.; Liles, D.; Cancado, R.; Bruederle, A.; Shi, M.; Zhu, Z.; Ataga, Ki: **Crizanlizumab 5.0 mg/kg increased the time to first on-treatment sickle cell pain crisis: a subgroup analysis of the phase ii sustain study.** *Blood Conference: 59th annual meeting of the american society of hematology, ASH 2017 United states* 2017, **130**(Supplement 1) (no pagination).
- Washko JKK, A.; Liles, D.; Cancado, R.; Shi, M.; Zhu, Z.; Ataga, K.: **Crizanlizumab 5.0mg/kg increased the time to first on-treatment Sickle Cell Pain Crisis (SCPC) and the likelihood of not experiencing SCPC while on treatment: Subgroup analyses of the phase 2 sustain study.** *Pediatric Blood and Cancer* 2018, **65** (Supplement 1):S81.
- Lemonne NM, B.; Charlot, K.; Garnier, Y.; Waltz, X.; Lamarre, Y.; Antoine-Jonville, S.; Etienne-Julan, M.; Hardy-Dessources, M. D.; Romana, M.; Connes, P.: **Effects of hydroxyurea on blood rheology in sickle cell anemia: A two-years follow-up study.** *Clin Hemorheol Microcirc* 2017, **67**(2):141-148.
- Quarmyne MOD, W.; Theodore, R.; Anand, S.; Barry, V.; Adisa, O.; Buchanan, I. D.; Bost, J.; Brown, R. C.; Joiner, C. H.; Lane, P. A.: **Hydroxyurea effectiveness in children and adolescents with sickle cell anemia: A large retrospective, population-based cohort.** *American Journal of Hematology* 2017, **92**(1):77-81.
- Daak AH, M.; Dampier, C.; Fuh, B.; Kanter, J.; Alvarez, O.; Black, V.; McNaull, M.; Callaghan, M.; George, A.; Neumayr, L.; Hilliard, L.; Sancilio, F.; Rabinowicz, A.: **Clinical effect of SC411 (Altemia TM) on children with sickle cell disease in the scot trial: A phase 2 randomized, double-blind, placebo-controlled, parallel-group, dose-finding multi-center study.** *Pediatric Blood and Cancer* 2018, **65** (Supplement 1):S8.
- Bridges KRG, B.; Bronte, L.: **A single center experience of GBT440 treatment of severe anemia in sickle cell disease (SCD).** *Blood Conference: 59th Annual Meeting of the American Society of Hematology, ASH* 2017, **130**(Supplement 1).

13. Charnigo RJT, B.; Rybin, D.; Pittman, D. D.; Sivamurthy, K. M.; Beidler, D.; Clarke, N.: **Safety and tolerability of PF-04447943 across a clinical trial program including 277 patients.** *Blood Conference: 59th Annual Meeting of the American Society of Hematology, ASH 2017*, **130**(Supplement 1).
14. Sins JWRF, K.; Rijneveld, A. W.; Boom, M. B.; Kerkhoffs, J. L. H.; van Meurs, A. H.; de Groot, M. R.; Heijboer, H.; Dresse, M. F.; Le, P. Q.; Hermans, P.; Vanderfaeillie, A.; Van Den Neste, E. W.; Benghiat, F. S.; Kesse-Adu, R.; Delannoy, A.; Efira, A.; Azerad, M. A.; de Borgie, C. A.; Biemond, B. J.: **Effect of N-acetylcysteine on pain in daily life in patients with sickle cell disease: A randomised clinical trial.** *British Journal of Haematology* 2017.
15. Sins JWRF, K.; Rijneveld, A. W.; Boom, M. B.; Kerkhoffs, J. L.; Van Meurs, A. H.; De Groot, M. R.; Heijboer, H.; Dresse, M. F.; Ferster, A.; Hermans, P.; Vanderfaeillie, A.; Van Den Neste, E. W.; Benghiat, F. S.; Howard, J.; Kesse-Adu, R.; Delannoy, A.; Efira, A.; Azerad, M. A.; De Borgie, C. A. J. M.; Biemond, B. J.: **N-acetylcysteine in patients with sickle cell disease: A randomized controlled trial.** *Blood Conference: 58th Annual Meeting of the American Society of Hematology, ASH 2016*, **128**(22).
16. Niihara Y, Miller ST, Kanter J, Lanzkron S, Smith WR, Hsu LL, Gordeuk VR, Viswanathan K, Sarnaik S, Osunkwo I *et al*: **A Phase 3 Trial of L-Glutamine in Sickle Cell Disease.** *N Engl J Med* 2018, **379**(3):226-235.
17. Niihara YT, Lan; Razon, Rafael; Stark, Charles; Macan, Henry: **Decrease in the Severity of Painful Sickle Cell Crises with Oral Pglg [Conference].** *Blood* 2015, **126**(23).
18. Niihara YK, Han A.; Tran, Lan; Razon, Rafael; Macan, Henry; Stark, Charles; Wun, Ted; Adams-Graves, Patricia: **A Phase 3 Study of L-Glutamine Therapy for Sickle Cell Anemia and Sickle beta(0)-Thalassemia [Conference].** *Blood* 2014, **124**(21).
19. Niihara YV, K.; Miller, S. T.; Guillaume, E.; Blackwood, M.; Razon, R.; Tran, L.; Stark, C.: **Phase 3 study of L-glutamine therapy in sickle cell anemia and sickle beta0 -thalassemia subgroup analyses show consistent clinical improvement.** *Blood Conference: 58th Annual Meeting of the American Society of Hematology, ASH 2016*, **128**(22).
20. Niihara YM, S.; Razon, R.; Claggett, B.; Onyekwere, O. C.; Ikeda, A.; Singleton, T.; Wood, A. K.; Singh, R.; Tran, L.; Stark, C. W.: **Phase 3 study of L-glutamine in sickle cell disease: Analyses of time to first and second crisis and average cumulative recurrent events.** *Blood Conference: 59th Annual Meeting of the American Society of Hematology, ASH 2017*, **130**(Supplement 1).
21. Sethy SP, T.; Jena, R. K.: **Beneficial Effect of Low Fixed Dose of Hydroxyurea in Vaso-occlusive Crisis and Transfusion Requirements in Adult HbSS Patients: A Prospective Study in a Tertiary Care Center.** *Indian Journal of Hematology and Blood Transfusion* 2018, **34**(2):294-298.
22. Di Maggio RH, M. M.; Zhao, X.; Calvaruso, G.; Rigano, P.; Renda, D.; Tisdale, J. F.; Maggio, A.: **Chronic administration of hydroxyurea (HU) benefits caucasian patients with sickle-beta thalassemia.** *International Journal of Molecular Sciences* 2018, **19** (3) (no pagination)(681).
23. Youssry IA-S, A.; Ismail, R.; Bou-Fakhredin, R.; Mohamed Samy, R.; Ezz El-Deen, F.; Taher, A. T.: **Enhancing Effect of Hydroxyurea on Hb F in Sickle Cell Disease: Ten-Year Egyptian Experience.** *Hemoglobin* 2017, **41**(4-6):267-273.
24. Bumma NK, A.; Surapaneni, M.; Kim, S.; Swerdlow, P.: **Scheduled outpatient red blood cell exchange program reduces admission and complications in sickle cell disease.** *Blood Conference: 59th Annual Meeting of the American Society of Hematology, ASH 2017*, **130**(Supplement 1).
25. Kwiatkowski JLT, F.; Rozova, A.: **Safety of deferiprone in individuals with sickle cell disease.** *Blood Conference: 59th Annual Meeting of the American Society of Hematology, ASH 2017*, **130**(Supplement 1).
26. Rigano PDF, L.; Sainati, L.; Piga, A.; Piel, F. B.; Cappellini, M. D.; Fidone, C.; Masera, N.; Palazzi, G.; Gianesin, B.; Forni, G. L.: **Real-life experience with hydroxyurea in sickle cell disease: A multicenter study in a cohort of patients with heterogeneous descent.** *Blood Cells, Molecules, and Diseases* 2018, **69**:82-89.
27. Al Hashmi KA-D, H.; Jose, S.; Al-Khabori, M. K.: **Hydroxyurea: Clinical and hematological effects in omani patients with sickle cell disease.** *Blood Conference: 59th Annual Meeting of the American Society of Hematology, ASH 2017*, **130**(Supplement 1).

28. Colombatti RP, G.; Masera, N.; Notarangelo, L. D.; Bonetti, E.; Samperi, P.; Barone, A.; Perrotta, S.; Facchini, E.; Miano, M.; Del Vecchio, G. C.; Guerzoni, M. E.; Corti, P.; Menzato, F.; Cesaro, S.; Casale, M.; Rigano, P.; Forni, G. L.; Russo, G.; Sainati, L.: **Hydroxyurea prescription, availability and use for children with sickle cell disease in Italy: Results of a National Multicenter survey.** *Pediatric Blood and Cancer* 2018, **65** (2) (no pagination)(e26774).
29. Brandalise SRA, R.; Laranjeira, A. B. A.; Yunes, J. A.; de Campos-Lima, P. O.: **Low-dose methotrexate in sickle-cell disease: A pilot study with rationale borrowed from rheumatoid arthritis.** *Experimental Hematology and Oncology* 2017, **6** (1) (no pagination)(18).
30. Keikhaei BY, H.; Bahadoram, M.: **Hydroxyurea: Clinical and Hematological Effects in Patients With Sickle Cell Anemia.** *Global journal of health science* 2015, **8**(3):252-256.
31. LeBlanc ZV, C.; Zhang, J.; Macksoud, S. R.; Battle, S.; Hilliard, L.; Lebensburger, J. D.; Howard, T. H.: **Management of severe chronic pain with methadone in pediatric patients with sickle cell disease.** *Blood Conference: 58th Annual Meeting of the American Society of Hematology, ASH* 2016, **128**(22).
32. Heeney MMH, Carolyn C.; Abboud, Miguel R.; Inusa, Baba; Kanter, Julie; Ogotu, Bernhards; Brown, Patricia B.; Heath, Lori E.; Jakubowski, Joseph A.; Zhou, Chunmei; Zamoryakhin, Dmitry; Agbenyega, Tsiri; Colombatti, Raffaella; Hassab, Hoda M.; Nduba, Videlis N.; Oyieko, Janet N.; Robitaille, Nancy; Segbefia, Catherine I.; Rees, David C.: **A Multinational Trial of Prasugrel for Sickle Cell Vaso-Occlusive Events.** *New England Journal of Medicine* 2016, **374**(7):625-635.
33. Heeney MH, C.; Abboud, M.; Inusa, B.; Kanter, J.; Ogotu, B.; Brown, P.; Heath, L.; Jakubowski, J.; Zhou, C.; Zamoryakhin, D.; Agbenyega, T.; Colombatti, R.; Hassab, H.; Nduba, V.; Oyieko, J.; Robitaille, N.; Segbefia, C.; Rees, D.: **Determining effects of platelet inhibition on vaso-occlusive events (DOVE) trial: A double-blind, placebo-controlled, study of prasugrel in paediatric patients with sickle cell anaemia.** *Haematologica* 2016, **101** (Supplement 1):136-137.
34. Reid MEEB, Amal; Inati, Adlette; Kutlar, Abdullah; Abboud, Miguel R.; Haynes, Johnson, Jr.; Ward, Richard; Sharon, Bruce; Taher, Ali T.; Smith, Wally; Manwani, Deepa; Ghalie, Richard G.: **A double-blind, placebo-controlled phase II study of the efficacy and safety of 2,2-dimethylbutyrate (HQB-1001), an oral fetal globin inducer, in sickle cell disease.** *American Journal of Hematology* 2014, **89**(7):709-713.
35. Adegoke SAS, Umar Abdullahi; Mohammed, Lasisi Oluwafemi; Sanusi, Yunusa; Oyelami, Oyeku Akibu: **Influence of Lime Juice on the Severity of Sickle Cell Anemia.** *Journal of Alternative and Complementary Medicine* 2013, **19**(6):588-592.
36. Arruda MMM, Grazielle; Rodrigues, Celso A.; Matsuda, Sandra S.; Rabelo, Iara B.; Figueiredo, Maria S.: **Antioxidant vitamins C and E supplementation increases markers of haemolysis in sickle cell anaemia patients: a randomized, double-blind, placebo-controlled trial.** *British Journal of Haematology* 2013, **160**(5):688-700.
37. Wun TS, Denis; Frelinger, Andrew L.; Krishnamurti, Lakshmanan; Novelli, Enrico M.; Kutlar, Abdullah; Ataga, Kenneth I.; Knupp, Charles L.; McMahon, Lillian E.; Strouse, John J.; Zhou, Chunmei; Heath, Lori E.; Nwachuku, Chuke E.; Jakubowski, Joseph A.; Riesmeyer, Jeffrey S.; Winters, Kenneth J.: **A double-blind, randomized, multicenter phase 2 study of prasugrel versus placebo in adult patients with sickle cell disease.** *Journal of Hematology & Oncology* 2013, **6**.
38. Soulieres DK, L.; Kutlar, A.; Ataga, K.; Zhou, C.; Heath, L.E.; Nwachuku, C.; Jakubowski, J.A.; Winters, K.J.; Riesmeyer, J. S.; Wun, T.: **A Randomized, Double-Blind, Adaptive Phase 2 Multi-Center Study of Prasugrel Compared to Placebo in Adults with Sickle Cell Disease** *American Journal of Hematology* 2012, **87**(7):E18-E19.
39. Wun TS, Denis; Krishnamurti, Lakshmanan; Kutlar, Abdullah; Ataga, Kenneth; Zhou, Chunmei; Heath, Lori E.; Nwachuku, Chuke E.; Jakubowski, Joseph A.; Winters, Kenneth J.; Riesmeyer, Jeffrey S.: **A Randomized, Double-Blind, Adaptive Phase 2 Multi-Center Study of Prasugrel Compared to Placebo in Adults with Sickle Cell Disease.** *Blood* 2011, **118**(21):847-847.

40. Daak AAG, Kebreab; Hassan, Zahir; Attallah, Bakhita; Azan, Haj H.; Elbashir, Mustafa I.; Crawford, Michael: **Effect of omega-3 (n-3) fatty acid supplementation in patients with sickle cell anemia: randomized, double-blind, placebo-controlled trial.** *American Journal of Clinical Nutrition* 2013, **97**(1):37-44.
41. Ataga KIR, Marvin; Ballas, Samir K.; Yasin, Zahida; Bigelow, Carolyn; St James, Luther; Smith, Wally R.; Galacteros, Frederic; Kutlar, Abdullah; Hull, James H.; Stocker, Jonathan W.: **Improvements in haemolysis and indicators of erythrocyte survival do not correlate with acute vaso-occlusive crises in patients with sickle cell disease: a phase III randomized, placebo-controlled, double-blind study of the gardos channel blocker senicapoc (ICA-17043).** *British Journal of Haematology* 2011, **153**(1):92-104.
42. Diop SS, Fabienne; Seck, Moussa; Gueye, Youssou Bamar; Dieye, Tandakha Ndiaye; Fall, Awa Oumar Toure; Sall, Abibatou; Thiam, Doudou; Diakhate, Lamine: **Sickle-cell disease and malaria: evaluation of seasonal intermittent preventive treatment with sulfadoxine-pyrimethamine in Senegalese patients-a randomized placebo-controlled trial.** *Annals of Hematology* 2011, **90**(1):23-27.
43. Diop SS, Moussa; Gueye, Youssou Bamar; Soudre, Fabienne; Fall, Awa Oumar Toure; Sall, Abibatou; Thiam, Doudou: **Sickle-Cell Disease and Malaria: Evaluation of Seasonal Intermittent Preventive Treatment with Sulfadoxine-Pyrimethamine in Senegalese patients-a Randomized Placebo-Controlled Trial [Conference].** *Blood* 2010, **116**(21):686-686.
44. Viana MBA, R. C.: **Painful Crises in Children with Sickle Cell Disease Are Not Prevented by Piracetam.** *Acta Haematologica* 2009, **121**(1):9-10.
45. Alvim RCV, M. B.; Pires, M. A. S.; Franklin, Hmoh; Paula, M. J.; Brito, A. C.; Oliveira, T. F.; Rezende, P. V.: **Inefficacy of piracetam in the prevention of painful crises in children and adolescents with sickle cell disease.** *Acta Haematologica* 2005, **113**(4):228-233.
46. Bao BP, Ananda S.; Beck, Frances W. J.; Snell, Diane; Suneja, Anupam; Sarkar, Fazlul H.; Doshi, Nimisha; Fitzgerald, James T.; Swerdlow, Paul: **Zinc supplementation decreases oxidative stress, incidence of infection, and generation of inflammatory cytokines in sickle cell disease patients.** *Translational Research* 2008, **152**(2):67-80.
47. Ataga KIS, Wally R.; De Castro, Laura M.; Swerdlow, Paul; Sauntharajah, Yogen; Castro, Oswaldo; Vichinsky, Elliot; Kutlar, Abdullah; Orringer, Eugene P.; Rigdon, Greg C.; Stocker, Jonathan W.: **Efficacy and safety of the Gardos channel blocker, senicapoc (ICA-17043), in patients with sickle cell anemia.** *Blood* 2008, **111**(8):3991-3997.
48. Eke FUA, I.: **Effects of pyrimethamine versus proguanil in malarial chemoprophylaxis in children with sickle cell disease: A randomized, placebo-controlled, open-label study.** *Current Therapeutic Research-Clinical and Experimental* 2003, **64**(8):616-625.
49. Pace BSS, A.; Pack-Mabien, A.; Mulekar, M.; Ardia, A.; Goodman, S. R.: **Effects of N-acetylcysteine on dense cell formation in sickle cell disease.** *American Journal of Hematology* 2003, **73**(1):26-32.
50. Wambebe CK, H.; Momoh, J. A. F.; Ekpeyong, M.; Audu, B. S.; Njoku, O. S.; Bamgboye, E. A.; Nasipuri, R. N.; Kunle, O. O.; Okogun, J. I.; Enwerem, M. N.; Audam, J. G.; Gamaniel, K. S.; Obodozie, O. O.; Samuel, B.; Fojule, G.; Ogunyale, O.: **Double-blind, placebo-controlled, randomised cross-over clinical trial of NIPRISAN (R) in patients with Sickle Cell Disorder.** *Phytomedicine* 2001, **8**(4):252-261.
51. Tomer AK, S.; Connor, W. E.; Clark, S.; Harker, L. A.; Eckman, J. R.: **Reduction of pain episodes and prothrombotic activity in sickle cell disease by dietary n-3 fatty acids.** *Thrombosis and Haemostasis* 2001, **85**(6):966-974.
52. Tomer AH, L. A.; Kasey, S.; Eckman, J. R.: **Dietary n-3 fatty acid treatment reduces the frequency of pain episodes and the prothrombotic state in sickle cell disease (SCD) [Conference].** *Blood* 1997, **90**(10 SUPPL. 1 PART 1):445A-445A.
53. de Aboud MdC, Z.; Guerrero, F.; Espino, M.; Austin, K. L.: **Effect of Depo-Provera (R) or Microgynon (R) on the painful crises of sickle cell anemia patients.** *Contraception* 1997, **56**(5):313-316.
54. Gupta VLC, B. S.: **Efficacy of zinc therapy in prevention of crisis in sickle cell anemia: a double blind, randomized controlled clinical trial.** *The Journal of the Association of Physicians of India* 1995, **43**(7):467-469.
55. Manrique RV: **Placebo Controlled Double-Blind-Study of Pentoxifylline in Sickle-Cell Disease Patients.** *Journal of Medicine* 1987, **18**(5-6):277-291.

56. Zago MAC, F. F.; Ismael, S. J.; Tone, L. G.; Bottura, C.: **Treatment of Sickle-Cell Diseases with Aspirin.** *Acta Haematologica* 1984, **72**(1):61-64.
57. Cabannes RL, J.; Castaigne, J. P.; Ondo, A.; Plassard, A.; Zohoun, I.: **Clinical and biological double-blind-study of ticlopidine in preventive treatment of sickle-cell disease crises.** *Agents and actions Supplements* 1984, **15**:199-212.
58. Gail MB, J.; Dark, A.; Lewis, R.; Morrow, H.: **A Double-Blind Randomized Trial of Low-Dose Oral Urea to Prevent Sickle-Cell Crises.** *Journal of Chronic Diseases* 1982, **35**(2):151-161.
59. Deceulaer KH, R.; Gruber, C.; Serjeant, G. R.: **Medroxyprogesterone Acetate and Homozygous Sickle-Cell Disease.** *Lancet* 1982, **2**(8292):229-231.
60. Mann JRS, J.: **Sodium-Bicarbonate Prophylaxis of Sickle-Cell Crisis.** *Pediatrics* 1974, **53**(3):414-416.
61. Isaacs WAA, O.; Effiong, C. E.: **Steroid Treatment in Prevention of Painful Episodes in Sickle-Cell Disease.** *Lancet* 1972, **1**(7750):570-8.
62. Oski FC, F. L.; Lessen, L.: **Failure of Promazine Hcl to Prevent Painful Episodes in Sickle Cell Anemia.** *Journal of Pediatrics* 1968, **73**(2):265-266.
63. NCT02482298: **A Study to Assess the Effect of Ticagrelor in Reducing the Number of Days With Pain in Patients With Sickle Cell Disease.** 2016.
64. NCT01476696: **A Study of Prasugrel in Pediatric Participants With Sickle Cell Disease.** 2012.
65. Wambebe COB, E. A.; Badru, B. O.; Khamofu, H.; Momoh, J. A.; Ekpeyong, M.; Audu, B. S.; Njoku, S. O.; Nasipuri, N. R.; Kunle, O. O.; Okogun, J. I.; Enwerem, N. M.; Gamaniel, S. K.; Obodozie, O. O.; Samuel, B.; Fojule, G.; Ogunyale, P. O.: **Efficacy of niprisan in the prophylactic management of patients with sickle cell disease.** *Current Therapeutic Research-Clinical and Experimental* 2001, **62**(1):26-34.
66. Vichinsky, E ; Neumayr, L.; Gold, J. I.; Weiner, M. W.; Kasten, J.; Truran, D.; Snyder, C.; Kesler, K.; Mahmoud Hussein, A.; Harrington, T. J.; McMahon, L.; Gordeuk, V. R.; Kutlar, A.; Orringer, E. P.; De Castro, L. M.; Field, J.; Swerdlow, P. S.; Bessman, J. D.; Snyder, R.; Strouse, J. J.; Armstrong, F. D. . Blood Conference: 52nd Annual Meeting of the American Society of Hematology, ASH. A randomized trial of the safety and benefit of transfusion vs. standard care in the prevention of sickle cell-related complications in adults: A preliminary report from the phase II NHLBI comprehensive sickle cell centers (CSCC) study of neuropsychological dysfunction and neuroimaging abnormalities in neurologically intact adult patients with sickle cell disease. 2010;116(21).
67. Styles LW, T.; De Castro, L. M.; Telen, M. J.; Kramer, W.; Flanner, H.; Magnani, J. L.; Thackray, H. GMI-1070, a pan-selectin inhibitor: Safety and PK in a phase 1/2 study in adults with sickle cell disease. Blood Conference: 52nd Annual Meeting of the American Society of Hematology, ASH. 2010;116(21).
