# Supplementary material
Source: HighWire-hosted journal article supplement (https://bmjopen.bmj.com/content/10/9/e034147)
Supplement: inline-supplementary-material-4 [file inline-supplementary-material-4.pdf]

## Appendix D. Systematic literature review protocol for transfusions.

### Search protocol

#### Objective

This search protocol aims to supplement new evidence on the treatment effects of transfusion used for preventing crises in sickle cell disease (SCD) patients in adults and adolescents for previous systematic literature review (led by Thomas Statistical Consultants). The search strategy and concept are modified from a recent systematic review by Sins et al.<sup>1</sup> and Fortin et al.<sup>2</sup>. The strategy has been developed to fulfil updated eligibility criteria (Table 1) and retrieve single-arm trials.

Table 1. Eligibility criteria

| Criteria             | Description                                                                                                                                                                                                                                                                                                                     |
|----------------------|---------------------------------------------------------------------------------------------------------------------------------------------------------------------------------------------------------------------------------------------------------------------------------------------------------------------------------|
| <b>Population</b>    | Trials that included SCD patients aged 16 and above                                                                                                                                                                                                                                                                             |
| <b>Interventions</b> | <ul style="list-style-type: none"> <li>• Red blood cell transfusions</li> <li>• Other types of transfusions</li> </ul>                                                                                                                                                                                                          |
| <b>Comparators</b>   | <ul style="list-style-type: none"> <li>• Placebo or best medical care</li> <li>• Interventions included in previous systematic review</li> </ul>                                                                                                                                                                                |
| <b>Outcomes</b>      | <ul style="list-style-type: none"> <li>• Pain, crisis and VOC (frequency, intensity and duration in one event)</li> <li>• Hospital admission, including emergency department (ED) and nurse visits</li> <li>• SCD complications, including acute chest syndromes</li> <li>• Analgesic use</li> <li>• Adverse events*</li> </ul> |
| <b>Study design</b>  | <ul style="list-style-type: none"> <li>• Randomized controlled trials (RCTs)</li> <li>• Single-arm studies</li> </ul>                                                                                                                                                                                                           |
| <b>Language</b>      | <ul style="list-style-type: none"> <li>• Only studies published in English</li> </ul>                                                                                                                                                                                                                                           |

\*In addition to efficacy outcomes, adverse events are of interest for the review, but will not be used as study selection criteria

#### Resources

##### *Electronic databases*

Studies will be identified by searching the following electronic databases:

- Cochrane Central Register of Controlled Trials (CENTRAL)
- Medical Literature Analysis and Retrieval System Online (MEDLINE)
- Excerpta Medica database (Embase)

##### *Hand-searches*

<sup>1</sup> Sins JWR, Mager DJ, Davis S, Biemond BJ, Fijnvandraat K: **Pharmacotherapeutical strategies in the prevention of acute, vaso-occlusive pain in sickle cell disease: a systematic review**. *Blood advances* 2017, 1(19):1598-1616.

<sup>2</sup> Fortin PM, Hopewell S, Estcourt LJ. **Red blood cell transfusion to treat or prevent complications in sickle cell disease: an overview of Cochrane reviews**. *Cochrane Database of Systematic Reviews* 2018, Issue 8. Art. No.: CD012082. DOI: 10.1002/14651858.CD012082.pub2.

- ClinicalTrial.gov

### Search strategy

Search strategies have been developed individually for CENTRAL, MEDLINE, Embase and ClinicalTrial.gov and their results are listed in Appendix 1-4. The concept of a search strategy is elaborated using MEDLINE as an example (Table 2). The search strategy was constructed according to the criteria (e.g. outcomes, population, intervention and study design) using MeSH or Emtree terms (thesaurus terms, headings and subheadings) and text words to retrieve potential references.

Table 2. Search strings and concepts

| No | Searches                                                                                                                                                                                                                                                                            | Results |              |
|----|-------------------------------------------------------------------------------------------------------------------------------------------------------------------------------------------------------------------------------------------------------------------------------------|---------|--------------|
| 1  | anemia, sickle cell/                                                                                                                                                                                                                                                                | 19329   | Population   |
| 2  | hemoglobin, sickle/                                                                                                                                                                                                                                                                 | 3011    |              |
| 3  | (sickle cell or sickle h?emoglobin or drepanocyt* or drepanotic or drepanocytemia or h?emoglobin-s or Hb-S or sickle an?emia or meniscocytosis).mp.                                                                                                                                 | 27120   |              |
| 4  | 1 or 2 or 3                                                                                                                                                                                                                                                                         | 27602   |              |
| 5  | Blood Transfusion/                                                                                                                                                                                                                                                                  | 48056   | Intervention |
| 6  | Erythrocyte Transfusion/                                                                                                                                                                                                                                                            | 8033    |              |
| 7  | ((blood or erythrocyte* or red cell* or red blood cell* or RBC*) adj5 (transfus* or infus* or unit* or therap*)).ti,ab.                                                                                                                                                             | 90906   |              |
| 8  | ((red cell* or RBC* or erythrocyte* or red blood cell* or whole blood or transfus*) adj5 (use* or usage* or utiliz* or utilis* or requir* or need* or administ* or replac* or support* or strateg* or management or practic* or indicat* or criteri* or standard* or program*)).ab. | 47785   |              |
| 9  | ((red cell* or RBC* or erythrocyte* or blood or transfus*) and (use* or usage* or utiliz* or utilis* or requir* or need* or administ* or replac* or support* or strateg* or management or practic* or indicat* or criteri* or standard* or program*)).ti.                           | 35184   |              |
| 10 | (allogeneic blood or (unit* adj2 blood) or allogenic blood or (blood adj2 exposure) or donor blood or blood product* or blood component* or blood support).ti,ab.                                                                                                                   | 26829   |              |
| 11 | (hemotransfus* or haemotransfus* or hypertransfus* or hemotherap* or haemotherap*).tw.                                                                                                                                                                                              | 1217    |              |
| 12 | (red cell* or erythrocyte* or blood or RBC*).tw. and transfus*.ti.                                                                                                                                                                                                                  | 24060   |              |
| 13 | 5 or 6 or 7 or 8 or 9 or 10 or 11 or 12                                                                                                                                                                                                                                             | 183648  |              |
| 14 | Blood Component Transfusion/                                                                                                                                                                                                                                                        | 3477    |              |
| 15 | PLASMA EXCHANGE/ or PLATELET TRANSFUSION/ or exp LEUKOCYTE TRANSFUSION/                                                                                                                                                                                                             | 16726   |              |

|    |                                                                                                                                                                                                                                                       |         |         |
|----|-------------------------------------------------------------------------------------------------------------------------------------------------------------------------------------------------------------------------------------------------------|---------|---------|
| 16 | 14 not 15                                                                                                                                                                                                                                             | 3229    |         |
| 17 | ERYTHROCYTES/                                                                                                                                                                                                                                         | 128578  |         |
| 18 | (red cell* or red blood cell* or erythrocyte* or RBC*).tw.                                                                                                                                                                                            | 216650  |         |
| 19 | 17 or 18                                                                                                                                                                                                                                              | 258199  |         |
| 20 | 16 and 19                                                                                                                                                                                                                                             | 834     |         |
| 21 | ((transfus* or red cell* or red blood cell* or RBC*) adj10 (trigger* or thresh?old* or target* or restrict* or liberal* or aggressive* or conservative* or prophylactic* or limit* or protocol* or policy or policies or practice* or standard*)).tw. | 13177   |         |
| 22 | ((transfus* or red cell* or red blood cell* or RBC* or h?ematocrit*) and (level* or critical* or intensive* or h?emorrhag* or bleed*)) or hypertransfus*).ti.                                                                                         | 3326    |         |
| 23 | 13 or 20 or 21 or 22                                                                                                                                                                                                                                  | 188025  |         |
| 24 | exp pain/                                                                                                                                                                                                                                             | 362648  |         |
| 25 | (pain or painfull).tw.                                                                                                                                                                                                                                | 547392  |         |
| 26 | (venoocclusive or "vein occlusive" or "vein interruption" or "vein obstruction" or "vein occlusion" or "vena obstruction" or "veno occlusive" or "venous obstruction" or "venous occlusion" or vaso-occlusiv* or crisis or crises).tw.                | 66169   | Outcome |
| 27 | exp length of stay/                                                                                                                                                                                                                                   | 77857   |         |
| 28 | (hospital adj3 (admission or stay)).tw.                                                                                                                                                                                                               | 104873  |         |
| 29 | (patient adj3 (admission or stay)).tw.                                                                                                                                                                                                                | 6507    |         |
| 30 | or/24-29                                                                                                                                                                                                                                              | 901074  |         |
| 31 | 4 and 23 and 30                                                                                                                                                                                                                                       | 848     |         |
| 32 | clinical trial/                                                                                                                                                                                                                                       | 512148  |         |
| 33 | (clinic adj5 trial*).ti,ab,sh.                                                                                                                                                                                                                        | 1010    |         |
| 34 | single blind method/                                                                                                                                                                                                                                  | 25632   |         |
| 35 | double blind method/                                                                                                                                                                                                                                  | 147368  |         |
| 36 | random allocation/                                                                                                                                                                                                                                    | 95709   |         |
| 37 | placebos/                                                                                                                                                                                                                                             | 34063   |         |
| 38 | (placebo or random*).ti,ab,sh.                                                                                                                                                                                                                        | 1263924 |         |
| 39 | randomized controlled trial/                                                                                                                                                                                                                          | 467730  |         |
| 40 | (randomized controlled trial or controlled clinical trial or clinical trial).pt.                                                                                                                                                                      | 786522  |         |
| 41 | ((single or double or triple or treble) adj (blind or mask*)).ti,ab,sh.                                                                                                                                                                               | 145215  |         |
| 42 | randomi?ed control trial*.tw.                                                                                                                                                                                                                         | 6481    |         |
| 43 | or/32-42                                                                                                                                                                                                                                              | 1565168 |         |

|    |                                                                                                                                                                                                   |         |                           |
|----|---------------------------------------------------------------------------------------------------------------------------------------------------------------------------------------------------|---------|---------------------------|
| 44 | epidemiologic studies/ or case-control studies/ or cross-sectional studies/ or cohort studies/ or follow-up studies/ or longitudinal studies/ or prospective studies/ or retrospective studies/   | 2187051 | Single-arm studies filter |
| 45 | ((epidemiologic or prospective or retrospective or cross-sectional or feasibil* or pilot or case control* or cohort or longitudinal) adj3 (study or trial* or studies)).ti,ab,kf.                 | 1071161 |                           |
| 46 | (case control* or cross-sectional or cohort? or follow-up or followup or longitudinal or prospective or retrospective or observational or population).ti.                                         | 615678  |                           |
| 47 | ((cohort? adj2 (analys* or compar* or data or study or studies)) or (population adj2 (based or data* or study or studies or register? or registry or registries or survey? or surveillance))).ab. | 340559  |                           |
| 48 | Clinical Trial, Phase I.pt.                                                                                                                                                                       | 18409   |                           |
| 49 | Clinical Trial, Phase II.pt.                                                                                                                                                                      | 29604   |                           |
| 50 | Clinical Trial, Phase III.pt.                                                                                                                                                                     | 14110   |                           |
| 51 | (registry or registries).ti,ab,kf,hw.                                                                                                                                                             | 139501  |                           |
| 52 | ((single adj arm*) or single-arm or single group or uncontrol* or un-control* or "no control*").ti,ab,kf,hw.                                                                                      | 53439   |                           |
| 53 | ((phase 1 or Phase i or Phase 2 or Phase ii or Phase 3 or Phase iii) and (trial* or study or studies)).ti,ab,kf.                                                                                  | 114108  |                           |
| 54 | (nonrandom* or non-random*).ti,ab,kf.                                                                                                                                                             | 34084   |                           |
| 55 | ((control* adj2 before adj2 after) or CBA study).ti,ab,kf.                                                                                                                                        | 2644    |                           |
| 56 | (all adj3 received).ab.                                                                                                                                                                           | 41192   |                           |
| 57 | or/44-56                                                                                                                                                                                          | 3114626 |                           |
| 58 | 31 and 43                                                                                                                                                                                         | 120     |                           |
| 59 | 31 and 57                                                                                                                                                                                         | 278     |                           |

## Search results

The numbers of references retrieved by search strategies from three databases are listed below. The search date was from the earliest date to 29<sup>th</sup> Aug 2018 in all databases. In total, there were 1,631 references retrieved.

### CENTRAL

- Number of references related to controlled trials: 332

### MEDLINE

- Number of references related to randomised controlled trials: 120
- Number of references related to single-arm studies: 279

#### Embase

- Number of references related to randomised controlled trials: 245
- Number of references related to single-arm studies: 599

#### ClinicalTrial.gov

- Number of references: 56

#### Deduplication

Duplicates were identified firstly by 'find duplicates' function in Endnote X8 and then double-checked manually by sorting author, title, volume and issue. After that, all references were de-duplicate against references retrieved from previous systematic review. This left 825 references from the electronic databases to be screened.

In terms of references from ClinicalTrial.gov, there were only 16 references left to be screened after deduplication.

In total, there are 841 references to go through during the title and abstract screening stage.

## Appendix 1. Search strategy and results for CENTRAL database

Search Strategy:

| #   | Searches                                                                                                                                                                                                                                                                                        | Results |
|-----|-------------------------------------------------------------------------------------------------------------------------------------------------------------------------------------------------------------------------------------------------------------------------------------------------|---------|
| #1  | MeSH descriptor: [Anemia, Sickle Cell] this term only                                                                                                                                                                                                                                           | 583     |
| #2  | MeSH descriptor: [Hemoglobin, Sickle] this term only                                                                                                                                                                                                                                            | 19      |
| #3  | (sickle cell or sickle h*emoglobin or drepanocyt* or drepanotic or drepanocytemia or h*emoglobin-s or Hb-S or sickle an*emia or meniscocytosis):ti,ab,kw                                                                                                                                        | 4790    |
| #4  | #1 or #2 or #3                                                                                                                                                                                                                                                                                  | 4790    |
| #5  | MeSH descriptor: [Blood Transfusion] this term only                                                                                                                                                                                                                                             | 1766    |
| #6  | MeSH descriptor: [Erythrocyte Transfusion] explode all trees                                                                                                                                                                                                                                    | 564     |
| #7  | ((blood or erythrocyte* or "red cell*" or "red blood cell*" or RBC*) near/5 (transfus* or infus* or unit*))                                                                                                                                                                                     | 14775   |
| #8  | ((red cell* or RBC* or erythrocyte* or red blood cell* or whole blood or transfus*) near/5 (use* or usage* or utiliz* or utilis* or requir* or need* or administ* or replac* or support* or strateg* or management or practic* or indicat* or criteri* or standard* or program* or therapy)):ab | 30189   |
| #9  | ((red cell* or RBC* or erythrocyte* or blood or transfus*) and (use* or usage* or utiliz* or utilis* or requir* or need* or administ* or replac* or support* or strateg* or management or practic* or indicat* or criteri* or standard* or program*)):ti                                        | 3612    |
| #10 | ("allogeneic blood" or (unit* near/2 blood) or "allogenic blood" or (blood near/2 exposure) or "donor blood" or "blood product*" or "blood component*" or "blood support")                                                                                                                      | 3365    |
| #11 | hemotransfus* or haemotransfus* or hypertransfus* or hemotherap* or haemotherap*                                                                                                                                                                                                                | 107     |
| #12 | (red cell* or erythrocyte* or blood or RBC*) and transfus*:ti                                                                                                                                                                                                                                   | 2434    |
| #13 | #5 or #6 or #7 or #8 or #9 or #10 or #11 or #12                                                                                                                                                                                                                                                 | 41927   |
| #14 | MeSH descriptor: [Blood Component Transfusion] this term only                                                                                                                                                                                                                                   | 115     |
| #15 | MeSH descriptor: [Erythrocytes] this term only                                                                                                                                                                                                                                                  | 1478    |
| #16 | (red cell* or red blood cell* or erythrocyte* or RBC*)                                                                                                                                                                                                                                          | 12756   |
| #17 | #14 and (#15 or #16)                                                                                                                                                                                                                                                                            | 39      |
| #18 | #13 or #17                                                                                                                                                                                                                                                                                      | 41927   |
| #19 | MeSH descriptor: [Pain] explode all trees                                                                                                                                                                                                                                                       | 42323   |
| #20 | (pain or painfull):ti,ab,kw                                                                                                                                                                                                                                                                     | 124349  |

|     |                                                                                                                                                                                                                                             |        |
|-----|---------------------------------------------------------------------------------------------------------------------------------------------------------------------------------------------------------------------------------------------|--------|
| #21 | (venoocclusive or "vein occlusive" or "vein interruption" or "vein obstruction" or "vein occlusion" or "vena obstruction" or "veno occlusive" or "venous obstruction" or "venous occlusion" or vaso-occlusiv* or crisis or crises):ti,ab,kw | 4404   |
| #22 | MeSH descriptor: [Length of Stay] explode all trees                                                                                                                                                                                         | 6488   |
| #23 | (hospital near/3 (admission or stay)):ti,ab,kw                                                                                                                                                                                              | 20854  |
| #24 | (patient near/3 (admission or stay)):ti,ab,kw                                                                                                                                                                                               | 1779   |
| #25 | #19 or #20 or #21 or #22 or #23 or #24                                                                                                                                                                                                      | 153780 |
| #26 | #4 and #18 and #25                                                                                                                                                                                                                          | 332    |

Of 332 results:

- Cochrane reviews: 35
- Cochrane Protocol: 1
- Trials: 296
- Editorials: 0
- Special collections: 0
- Clinical Answers: 0

## Appendix 2. Search strategy and results for MEDLINE

Database(s): **Ovid MEDLINE(R) and Epub Ahead of Print, In-Process & Other Non-Indexed Citations and Daily** 1946 to August 29, 2018

Search Strategy:

| #  | Searches                                                                                                                                                                                                                                                                            | Results |
|----|-------------------------------------------------------------------------------------------------------------------------------------------------------------------------------------------------------------------------------------------------------------------------------------|---------|
| 1  | anemia, sickle cell/                                                                                                                                                                                                                                                                | 19329   |
| 2  | hemoglobin, sickle/                                                                                                                                                                                                                                                                 | 3011    |
| 3  | (sickle cell or sickle h?emoglobin or drepanocyt* or drepanotic or drepanocytemia or h?emoglobin-s or Hb-S or sickle an?emia or meniscocytosis).mp.                                                                                                                                 | 27120   |
| 4  | 1 or 2 or 3                                                                                                                                                                                                                                                                         | 27602   |
| 5  | Blood Transfusion/                                                                                                                                                                                                                                                                  | 48056   |
| 6  | Erythrocyte Transfusion/                                                                                                                                                                                                                                                            | 8033    |
| 7  | ((blood or erythrocyte* or red cell* or red blood cell* or RBC*) adj5 (transfus* or infus* or unit* or therap*)).ti.ab.                                                                                                                                                             | 90906   |
| 8  | ((red cell* or RBC* or erythrocyte* or red blood cell* or whole blood or transfus*) adj5 (use* or usage* or utiliz* or utilis* or requir* or need* or administ* or replac* or support* or strateg* or management or practic* or indicat* or criteri* or standard* or program*)).ab. | 47785   |
| 9  | ((red cell* or RBC* or erythrocyte* or blood or transfus*) and (use* or usage* or utiliz* or utilis* or requir* or need* or administ* or replac* or support* or strateg* or management or practic* or indicat* or criteri* or standard* or program*)).ti.                           | 35184   |
| 10 | (allogeneic blood or (unit* adj2 blood) or allogenic blood or (blood adj2 exposure) or donor blood or blood product* or blood component* or blood support).ti.ab.                                                                                                                   | 26829   |
| 11 | (hemotransfus* or haemotransfus* or hypertransfus* or hemotherap* or haemotherap*).tw.                                                                                                                                                                                              | 1217    |
| 12 | (red cell* or erythrocyte* or blood or RBC*).tw. and transfus*.ti.                                                                                                                                                                                                                  | 24060   |
| 13 | 5 or 6 or 7 or 8 or 9 or 10 or 11 or 12                                                                                                                                                                                                                                             | 183648  |
| 14 | Blood Component Transfusion/                                                                                                                                                                                                                                                        | 3477    |
| 15 | PLASMA EXCHANGE/ or PLATELET TRANSFUSION/ or exp LEUKOCYTE TRANSFUSION/                                                                                                                                                                                                             | 16726   |
| 16 | 14 not 15                                                                                                                                                                                                                                                                           | 3229    |
| 17 | ERYTHROCYTES/                                                                                                                                                                                                                                                                       | 128578  |
| 18 | (red cell* or red blood cell* or erythrocyte* or RBC*).tw.                                                                                                                                                                                                                          | 216650  |



|    |                                                                                                                                                                                                                                                       |         |
|----|-------------------------------------------------------------------------------------------------------------------------------------------------------------------------------------------------------------------------------------------------------|---------|
| 19 | 17 or 18                                                                                                                                                                                                                                              | 258199  |
| 20 | 16 and 19                                                                                                                                                                                                                                             | 834     |
| 21 | ((transfus* or red cell* or red blood cell* or RBC*) adj10 (trigger* or thresh?old* or target* or restrict* or liberal* or aggressive* or conservative* or prophylactic* or limit* or protocol* or policy or policies or practice* or standard*)).tw. | 13177   |
| 22 | ((transfus* or red cell* or red blood cell* or RBC* or h?ematocrit*) and (level* or critical* or intensive* or h?emorrhag* or bleed*)) or hypertransfus*).ti.                                                                                         | 3326    |
| 23 | 13 or 20 or 21 or 22                                                                                                                                                                                                                                  | 188025  |
| 24 | exp pain/                                                                                                                                                                                                                                             | 362648  |
| 25 | (pain or painfull).tw.                                                                                                                                                                                                                                | 547392  |
| 26 | (venoocclusive or "vein occlusive" or "vein interruption" or "vein obstruction" or "vein occlusion" or "vena obstruction" or "veno occlusive" or "venous obstruction" or "venous occlusion" or vaso-occlusiv* or crisis or crises).tw.                | 66169   |
| 27 | exp length of stay/                                                                                                                                                                                                                                   | 77857   |
| 28 | (hospital adj3 (admission or stay)).tw.                                                                                                                                                                                                               | 104873  |
| 29 | (patient adj3 (admission or stay)).tw.                                                                                                                                                                                                                | 6507    |
| 30 | or/24-29                                                                                                                                                                                                                                              | 901074  |
| 31 | 4 and 23 and 30                                                                                                                                                                                                                                       | 848     |
| 32 | clinical trial/                                                                                                                                                                                                                                       | 512148  |
| 33 | (clinic adj5 trial*).ti,ab,sh.                                                                                                                                                                                                                        | 1010    |
| 34 | single blind method/                                                                                                                                                                                                                                  | 25632   |
| 35 | double blind method/                                                                                                                                                                                                                                  | 147368  |
| 36 | random allocation/                                                                                                                                                                                                                                    | 95709   |
| 37 | placebos/                                                                                                                                                                                                                                             | 34063   |
| 38 | (placebo or random*).ti,ab,sh.                                                                                                                                                                                                                        | 1263924 |
| 39 | randomized controlled trial/                                                                                                                                                                                                                          | 467730  |
| 40 | (randomized controlled trial or controlled clinical trial or clinical trial).pt.                                                                                                                                                                      | 786522  |
| 41 | ((single or double or triple or treble) adj (blind or mask*)).ti,ab,sh.                                                                                                                                                                               | 145215  |
| 42 | randomi?ed control trial*.tw.                                                                                                                                                                                                                         | 6481    |
| 43 | or/32-42                                                                                                                                                                                                                                              | 1565168 |
| 44 | epidemiologic studies/ or case-control studies/ or cross-sectional studies/ or cohort studies/ or follow-up studies/ or longitudinal studies/ or prospective studies/ or retrospective studies/                                                       | 2187051 |
| 45 | ((epidemiologic or prospective or retrospective or cross-sectional or feasibil* or pilot or case control* or cohort or longitudinal) adj3 (study or trial* or studies)).ti,ab,kf.                                                                     | 1071161 |

|    |                                                                                                                                                                                                   |         |
|----|---------------------------------------------------------------------------------------------------------------------------------------------------------------------------------------------------|---------|
| 46 | (case control* or cross-sectional or cohort? or follow-up or followup or longitudinal or prospective or retrospective or observational or population).ti.                                         | 615678  |
| 47 | ((cohort? adj2 (analys* or compar* or data or study or studies)) or (population adj2 (based or data* or study or studies or register? or registry or registries or survey? or surveillance))).ab. | 340559  |
| 48 | Clinical Trial, Phase I.pt.                                                                                                                                                                       | 18409   |
| 49 | Clinical Trial, Phase II.pt.                                                                                                                                                                      | 29604   |
| 50 | Clinical Trial, Phase III.pt.                                                                                                                                                                     | 14110   |
| 51 | (registry or registries).ti,ab,kf,hw.                                                                                                                                                             | 139501  |
| 52 | ((single adj arm*) or single-arm or single group or uncontrol* or un-control* or "no control*").ti,ab,kf,hw.                                                                                      | 53439   |
| 53 | ((phase 1 or Phase i or Phase 2 or Phase ii or Phase 3 or Phase iii) and (trial* or study or studies)).ti,ab,kf.                                                                                  | 114108  |
| 54 | (nonrandom* or non-random*).ti,ab,kf.                                                                                                                                                             | 34084   |
| 55 | ((control* adj2 before adj2 after) or CBA study).ti,ab,kf.                                                                                                                                        | 2644    |
| 56 | (all adj3 received).ab.                                                                                                                                                                           | 41192   |
| 57 | or/44-56                                                                                                                                                                                          | 3114626 |
| 58 | 31 and 43                                                                                                                                                                                         | 120     |
| 59 | 31 and 57                                                                                                                                                                                         | 278     |

### Appendix 3. Search strategy and results for Embase database

Database(s): **Embase** 1974 to 2018 Week 35

Search Strategy:

| #  | Searches                                                                                                                                                                                                                                                                            | Results |
|----|-------------------------------------------------------------------------------------------------------------------------------------------------------------------------------------------------------------------------------------------------------------------------------------|---------|
| 1  | exp Anemia, Sickle Cell/                                                                                                                                                                                                                                                            | 32009   |
| 2  | (h?emoglobin s or h?emoglobin sc or h?emoglobin se or h?emoglobin ss or h?emoglobin c or h?emoglobin d or Hb s or Hb sc or Hb se or Hb ss or Hb c or Hb d or sc disease*).tw.                                                                                                       | 5794    |
| 3  | (sickle cell or sicklemlia or sickled or sickling or meniscocyt* or drepanocyt*).tw.                                                                                                                                                                                                | 29569   |
| 4  | 1 or 2 or 3                                                                                                                                                                                                                                                                         | 38361   |
| 5  | Blood Transfusion/                                                                                                                                                                                                                                                                  | 108332  |
| 6  | Erythrocyte Transfusion/                                                                                                                                                                                                                                                            | 23021   |
| 7  | ((blood or erythrocyte* or red cell* or red blood cell* or RBC*) adj5 (transfus* or infus* or unit* or therap*)).ti,ab.                                                                                                                                                             | 135137  |
| 8  | ((red cell* or RBC* or erythrocyte* or red blood cell* or whole blood or transfus*) adj5 (use* or usage* or utiliz* or utilis* or requir* or need* or administ* or replac* or support* or strateg* or management or practic* or indicat* or criteri* or standard* or program*)).ab. | 77239   |
| 9  | ((red cell* or RBC* or erythrocyte* or blood or transfus*) and (use* or usage* or utiliz* or utilis* or requir* or need* or administ* or replac* or support* or strateg* or management or practic* or indicat* or criteri* or standard* or program*)).ti.                           | 38387   |
| 10 | (allogeneic blood or (unit* adj2 blood) or allogenic blood or (blood adj2 exposure) or donor blood or blood product* or blood component* or blood support).ti,ab.                                                                                                                   | 43111   |
| 11 | (hemotransfus* or haemotransfus* or hypertransfus* or hemotherap* or haemotherap*).tw.                                                                                                                                                                                              | 1555    |
| 12 | (red cell* or erythrocyte* or blood or RBC*).tw. and transfus*.ti.                                                                                                                                                                                                                  | 28985   |
| 13 | 5 or 6 or 7 or 8 or 9 or 10 or 11 or 12                                                                                                                                                                                                                                             | 273982  |
| 14 | Blood Component Transfusion/                                                                                                                                                                                                                                                        | 2629    |
| 15 | PLASMA EXCHANGE/ or PLATELET TRANSFUSION/ or exp LEUKOCYTE TRANSFUSION/                                                                                                                                                                                                             | 19765   |
| 16 | 14 not 15                                                                                                                                                                                                                                                                           | 2279    |
| 17 | ERYTHROCYTES/                                                                                                                                                                                                                                                                       | 112741  |
| 18 | (red cell* or red blood cell* or erythrocyte* or RBC*).tw.                                                                                                                                                                                                                          | 256379  |

|    |                                                                                                                                                                                                                                                       |         |
|----|-------------------------------------------------------------------------------------------------------------------------------------------------------------------------------------------------------------------------------------------------------|---------|
| 19 | 17 or 18                                                                                                                                                                                                                                              | 278120  |
| 20 | 16 and 19                                                                                                                                                                                                                                             | 523     |
| 21 | ((transfus* or red cell* or red blood cell* or RBC*) adj10 (trigger* or thresh?old* or target* or restrict* or liberal* or aggressive* or conservative* or prophylactic* or limit* or protocol* or policy or policies or practice* or standard*)).tw. | 22304   |
| 22 | ((transfus* or red cell* or red blood cell* or RBC* or h?ematocrit*) and (level* or critical* or intensive* or h?emorrhag* or bleed*)) or hypertransfus*).ti.                                                                                         | 4095    |
| 23 | 13 or 20 or 21 or 22                                                                                                                                                                                                                                  | 279695  |
| 24 | exp pain/                                                                                                                                                                                                                                             | 1146280 |
| 25 | (pain or painfull).tw.                                                                                                                                                                                                                                | 789805  |
| 26 | (venoocclusive or "vein occlusive" or "vein interruption" or "vein obstruction" or "vein occlusion" or "vena obstruction" or "veno occlusive" or "venous obstruction" or "venous occlusion" or vaso-occlusiv* or crisis or crises).tw.                | 82887   |
| 27 | exp length of stay/                                                                                                                                                                                                                                   | 150699  |
| 28 | (hospital adj3 (admission or stay)).tw.                                                                                                                                                                                                               | 169748  |
| 29 | (patient adj3 (admission or stay)).tw.                                                                                                                                                                                                                | 12514   |
| 30 | or/24-29                                                                                                                                                                                                                                              | 1690290 |
| 31 | 4 and 23 and 30                                                                                                                                                                                                                                       | 2325    |
| 32 | randomized controlled trial/                                                                                                                                                                                                                          | 508600  |
| 33 | (RCT or randomi#ed or randomi#ation).ab,ti,kw,hw.                                                                                                                                                                                                     | 1062285 |
| 34 | (random* adj3 (administ* or allocat* or assign* or class* or control* or determine* or divide* or distribut* or expose* or fashion* or number* or place* or recruit* or substitut* or treat*)).ab,kw.                                                 | 560662  |
| 35 | trial.ti.                                                                                                                                                                                                                                             | 248694  |
| 36 | crossover procedure/                                                                                                                                                                                                                                  | 56042   |
| 37 | ((singl* or doubl* or tripl* or trebl*) adj3 (blind* or mask* or dumm*)).ti,ab,kw,hw.                                                                                                                                                                 | 276112  |
| 38 | phase 2 clinical trial/ or phase 3 clinical trial/ or phase 4 clinical trial/                                                                                                                                                                         | 99658   |
| 39 | or/32-38                                                                                                                                                                                                                                              | 1386841 |
| 40 | prospective study/ or retrospective study/ or longitudinal study/ or cohort analysis/ or cross-sectional study/ or case control study/ or population based case control study/                                                                        | 1771952 |
| 41 | ((epidemiologic or prospective or retrospective or cross-sectional or feasibil* or pilot or case control* or cohort or longitudinal) adj3 study).ti,ab,kw.                                                                                            | 1282224 |
| 42 | (case control* or cross-sectional or cohort? or follow-up or followup or longitudinal or prospective or retrospective or observational or population).ti.                                                                                             | 790240  |
| 43 | ((cohort? adj2 (analys* or compar* or data or study or studies)) or (population adj2 (based or data* or study or studies or register? or registry or registries or survey? or surveillance))).ab,kw.                                                  | 500633  |

|    |                                                                                                                  |         |
|----|------------------------------------------------------------------------------------------------------------------|---------|
| 44 | (registry or registries).ti,ab,kw,hw.                                                                            | 183687  |
| 45 | (nonrandom* or non-random*).ti,ab,kw.                                                                            | 42777   |
| 46 | ((control* adj2 before adj2 after) or CBA study).ti,ab,kw.                                                       | 3333    |
| 47 | ((single adj arm*) or single-arm or single group or uncontrol* or un-control* or "no control*").ti,ab,kw.        | 80316   |
| 48 | (all adj3 received).ab.                                                                                          | 75969   |
| 49 | phase 2 clinical trial/ or phase 3 clinical trial/ or phase 1 clinical trial/                                    | 126474  |
| 50 | ((phase 1 or Phase i or Phase 2 or Phase ii or Phase 3 or Phase iii) and (trial* or study or studies)).ti,ab,kw. | 205403  |
| 51 | or/40-50                                                                                                         | 3180246 |
| 52 | 31 and 39                                                                                                        | 245     |
| 53 | 31 and 51                                                                                                        | 599     |

## Appendix 4. Search strategy and results for ClinicalTrial.gov

| #  | Searches                                                                                                                                                                                                                           | Search column          |
|----|------------------------------------------------------------------------------------------------------------------------------------------------------------------------------------------------------------------------------------|------------------------|
| #1 | Anemia, Sickle Cell OR Sickle Beta Thalassemia OR Sickle Cell Anemia OR Sickle Cell trait                                                                                                                                          | Condition or disease   |
| #2 | SCD OR SCA OR Sickle                                                                                                                                                                                                               | Other terms            |
| #3 | Transfusion OR blood OR RBC OR hematocrit OR erythrocyte                                                                                                                                                                           | Intervention/treatment |
| #4 | pain OR hospitalisation OR hospitalization OR (hospital AND (admission OR stay)) OR crisis OR VOC OR ((vaso OR vein OR vena OR venous) AND (occlusive OR occlusive OR interruption OR obstruction)) OR survival OR quality of life | Outcome Measures       |
|    | #1 or #2 or #3 or #4                                                                                                                                                                                                               |                        |

\*Advanced Search option without any restrictions except search strings listed.
