# Supplementary material
Source: HighWire-hosted journal article supplement (https://bmjopen.bmj.com/content/10/9/e034147)
Supplement: inline-supplementary-material-6 [file inline-supplementary-material-6.pdf]

## Appendix F: Characteristics and outcomes of studies included in the network meta-analysis\*

| Author/Year/Country Ref/Enrolment/NCT registry       | Design Total N of PT (N of female); N of arm Follow-ups | Interventions                                                                                                                                      | Crisis                            | All-cause Hospitalization days        | Adverse events (AE)               | Serious adverse events (SAE)       |
|------------------------------------------------------|---------------------------------------------------------|----------------------------------------------------------------------------------------------------------------------------------------------------|-----------------------------------|---------------------------------------|-----------------------------------|------------------------------------|
| Glassberg 2017 <sup>47</sup><br>USA                  | RCT, triple-blind<br><br>Adults and adolescents         | 1. Mometasone furoate 220mcg OD inhale (n=35)<br><br>In addition to standard SCD care                                                              |                                   | Rate hospitalization days: 2.67       | Total number of AE: 32            |                                    |
| Feb 2014 to Oct 2016<br>NCT02061202                  | Single centre<br>54 (23); 2<br><br>16 weeks             | 2. Placebo (n=17)<br><br>In addition to standard SCD care                                                                                          |                                   | Rate of hospitalization days: 4.09    | Total number of AE: 9             |                                    |
| Ataga 2017 <sup>15</sup><br><br>Brazil, Jamaica, USA | RCT, double-blind<br><br>Adults and adolescents         | 1. Crizanlizumab 5 mg/kg IV (n=67)<br><br>Two doses 2 weeks apart (loading dose) and then every 4 weeks. A<br><br>total of 14 doses for 50 weeks   | Median annual rate of crisis 1.63 | Annual rate of days hospitalized 4.00 | Number of patients with ≥1 AE: 57 | Number of patients with ≥1 SAE: 17 |
| Aug 2013 to Jan 2015<br>NCT01895361                  | Multicentre<br><br>198 (109); 3<br><br>52 weeks         | 2. Crizanlizumab 2.5 mg/kg IV (n=66)<br><br>Two doses 2 weeks apart (loading dose) and then every 4 weeks. A<br><br>total of 14 doses for 50 weeks | Median annual rate of crisis 2.01 | Annual rate of days hospitalized 6.87 | Number of patients with ≥1 AE: 56 | Number of patients with ≥1 SAE: 21 |
|                                                      |                                                         | 3. Placebo (n=65)                                                                                                                                  | Median annual rate of crisis 2.98 | Annual rate of days hospitalized 6.87 | Number of patients with ≥1 AE: 55 | Number of patients with ≥1 SAE: 17 |
| Sins 2017 <sup>48</sup><br>Netherlands, Belgium, UK  | RCT, double-blind<br><br>Adults                         | 1. NAC 600mg BID oral (n=27)                                                                                                                       |                                   | Total hospital admission days: 9      | Total number of AE: 39            | Total number of SAE: 8             |
| Apr 2013 to Nov 2015<br>NCT01849016                  | Multicentre<br>96 (40); 2<br><br>6 months               | 2. Placebo (n=40)                                                                                                                                  |                                   | Total hospital admission days: 53     | Total number of AE: 36            | Total number of SAE: 2             |
| Niihara 2018 <sup>12</sup><br>US                     | RCT, double-blind (phase 3)                             | 1. L-glutamine 0.3 g/kg BID oral (n=152)<br><br>Maximum dose: 30mg                                                                                 | Mean number pain crises: 3.2      | Total hospitalization days: 12.1      | Percentage with ≥1 AE: 0.98       | Percentage with ≥1 SAE: 0.782      |

|                                                                                                                      |                                                                                                                                   |                                                                                                                                                                                                                                                                                  |                                 |                                                                                                                                          |                                   |                                                              |
|----------------------------------------------------------------------------------------------------------------------|-----------------------------------------------------------------------------------------------------------------------------------|----------------------------------------------------------------------------------------------------------------------------------------------------------------------------------------------------------------------------------------------------------------------------------|---------------------------------|------------------------------------------------------------------------------------------------------------------------------------------|-----------------------------------|--------------------------------------------------------------|
| Jun 2010 to Dec 2013<br>NCT01179217                                                                                  | Adults and children<br>Multicentre<br>230 (124); 2<br><br>48 weeks                                                                | 2. placebo (n=78)                                                                                                                                                                                                                                                                | Mean number<br>pain crises: 3.9 | Total hospitalization<br>days: 18.1                                                                                                      | Percentage with $\geq 1$ AE: 1.00 | Percentage with $\geq 1$ SAE: 0.871                          |
| Ataga 2011 <sup>56</sup><br>United<br><br>States, Jamaica, Brazil,<br>France, Trinidad and<br>the United<br>Kingdom. | RCT, double-blind (phase 3,<br>terminated early)<br><br>Adults and adolescents<br><br>Multicentre<br>297 (160); 2<br><br>52 weeks | 1. Senicapoc 20mg/d BID (loading) and then<br>10mg/dOD oral (n=145)<br><br>2. Placebo (n=144)                                                                                                                                                                                    |                                 | Total number of<br>crises: 89<br><br>Total number of<br>crises: 106                                                                      |                                   | Total number of AE:<br>127<br><br>Total number of AE:<br>119 |
| Feb 2005 to Apr 2007<br>NCT00102791                                                                                  |                                                                                                                                   |                                                                                                                                                                                                                                                                                  |                                 |                                                                                                                                          |                                   |                                                              |
| Ataga 2008 <sup>52</sup><br>US                                                                                       | RCT, double-blind (phase 2)<br><br>Adults                                                                                         | 1. Senicapoc (high-dose): 150 mg (loading dose);10<br>mg/d (maintenance) oral OD (n=31)                                                                                                                                                                                          |                                 | Total number of<br>crises: 5                                                                                                             |                                   |                                                              |
| Feb 2002 and Jan 2004<br>NCT00040677                                                                                 | Multicentre<br>90 (45); 3<br><br>12 weeks                                                                                         | 2. Senicapoc (low-dose): 100 mg (loading dose);6<br>mg/d(maintenance) oral OD (n=29)<br><br>3. Placebo (n=30)                                                                                                                                                                    |                                 | Total number of<br>crises: 5<br><br>Total number of<br>crises: 5                                                                         |                                   |                                                              |
| Pace 2003 <sup>51</sup><br>USA                                                                                       | RCT, double-blind<br><br>Adults and Adolescents<br><br>Single centre<br>21 (10); 4<br><br>7 months                                | 1. NAC (high-dose) 2400mg/day (n=6)<br><br>All doses were divided by 3 to be taken<br>2. NAC (mid-dose) 1200mg/day (n=5)<br><br>All doses were divided by 3 to be taken<br>3. NAC (low-dose) 600 mg/day (n=5)<br><br>All doses were divided by 3 to be taken<br>4. Placebo (n=5) |                                 | Total number of<br>crises: 5<br><br>Total number of<br>crises: 5<br><br>Total number of<br>crises: 4<br><br>Total number of<br>crises: 3 |                                   |                                                              |
| NCT02482298 <sup>55</sup><br>USA, Egypt, France,<br>Italy, Kenya, Lebanon,<br>UK, Turkey                             | RCT, double-blind<br><br>Adults                                                                                                   | 1. Ticagrelor 45mg BID oral (n=30)<br><br>2. Ticagrelor 10MG BID oral (n=27)                                                                                                                                                                                                     |                                 |                                                                                                                                          |                                   | Total number of<br>SAE: 5<br><br>Total number of<br>SAE: 6   |

|                                                       |                                                   |                                   |                           |
|-------------------------------------------------------|---------------------------------------------------|-----------------------------------|---------------------------|
| Jul 2015 to Nov 2016                                  | Multicentre<br>87 (47); 3                         | 3. Placebo (n =30)                | Total number of<br>SAE: 6 |
| Wun 2013 <sup>46</sup><br>United States and<br>Canada | 12 weeks<br>RCT, double-blind (phase 2)<br>Adults | 1. Prasugrel 5 mg/day oral (n=41) | Total number of<br>SAE: 8 |
| 26 Aug 2010 to 13 Jun<br>2011<br>NCT01167023          | Multicentre<br>62 (30); 2                         | 2. placebo (n=19)                 | Total number of<br>SAE: 4 |

\*ACS: Acute chest syndrome; ALT: Alanine transaminase; CA: Conference abstract; Cr: creatinine; CSRPM: Center for Scientific Research into Plant Medicine; CT: Clinical trial registry; DDCF: Doris Duke Charitable Foundation; ED: emergency department; HbSS: Homozygous sickle haemoglobin (HbS); HbSC: sickle haemoglobin S and haemoglobin C; HbSβ: sickle beta thalassemia, type '0' or '+'; HU: hydroxyurea; JA: Journal article; MTX: Methotrexate; NAD: N-acetylcysteine ;NCATS: National Center for Advancing Translational Sciences; NCCR: National Center for Research Resources; NHLBI: National Heart Lung and Blood Institute; NSAID: Nonsteroidal anti-inflammatory drugs; NR: Not reported; OOPD: FDA's Office of Orphan Products Development; PT: patient; SCD: sickle cell disease; TCD: transcranial Doppler; ZonMw: The Netherlands Organisation for Health Research and Development

\*\* Entry is blank if no data provided for crisis, all-cause hospitalization days, adverse events, or serious adverse events. See appendix for relevant link function to connect different outcome summaries to network meta-analysis.
